# Supplementary material for: How people fit in at work: systematic review of the association between person–organisation and person–group fit with staff outcomes in healthcare
Source: PubMed Central journal article supplement — BMJ Open. 2019 May 9;9(5):e026266. doi: 10.1136/bmjopen-2018-026266 (PMC6527974; doi:10.1136/bmjopen-2018-026266), 2019-05-09
Supplement: bmjopen-2018-026266.draft_revisions.pdf [file bmjopen-2018-026266.draft_revisions.pdf]

# BMJ Open

BMJ Open is committed to open peer review. As part of this commitment we make the peer review history of every article we publish publicly available.

When an article is published we post the peer reviewers' comments and the authors' responses online. We also post the versions of the paper that were used during peer review. These are the versions that the peer review comments apply to.

The versions of the paper that follow are the versions that were submitted during the peer review process. They are not the versions of record or the final published versions. They should not be cited or distributed as the published version of this manuscript.

BMJ Open is an open access journal and the full, final, typeset and author-corrected version of record of the manuscript is available on our site with no access controls, subscription charges or pay-per-view fees (<http://bmjopen.bmj.com>).

If you have any questions on BMJ Open's open peer review process please email [info.bmjopen@bmj.com](mailto:info.bmjopen@bmj.com)

# BMJ Open

## How people fit in at work: A systematic review of the association between person-organisation and person-group fit with staff outcomes in healthcare

|                               |                                                                                                                                                                                                                                                                                                                                                                                                                                                                                         |
|-------------------------------|-----------------------------------------------------------------------------------------------------------------------------------------------------------------------------------------------------------------------------------------------------------------------------------------------------------------------------------------------------------------------------------------------------------------------------------------------------------------------------------------|
| Journal:                      | <i>BMJ Open</i>                                                                                                                                                                                                                                                                                                                                                                                                                                                                         |
| Manuscript ID                 | bmjopen-2018-026266                                                                                                                                                                                                                                                                                                                                                                                                                                                                     |
| Article Type:                 | Research                                                                                                                                                                                                                                                                                                                                                                                                                                                                                |
| Date Submitted by the Author: | 24-Aug-2018                                                                                                                                                                                                                                                                                                                                                                                                                                                                             |
| Complete List of Authors:     | Herkes, Jessica; Macquarie University, Australian Institute of Health Innovation<br>Churruca, Kate; Macquarie University, Australian Institute of Health Innovation; Macquarie University<br>Ellis, Louise A.; Macquarie University, Institute of Health Innovation<br>Pomare, Chiara; Macquarie University Faculty of Medicine and Health Sciences, Australian Institute of Health Innovation<br>Braithwaite, Jeffrey; Macquarie University, Australian Institute of Health Innovation |
| Keywords:                     | Organisational development < HEALTH SERVICES ADMINISTRATION & MANAGEMENT, Organisation of health services < HEALTH SERVICES ADMINISTRATION & MANAGEMENT, Human resource management < HEALTH SERVICES ADMINISTRATION & MANAGEMENT                                                                                                                                                                                                                                                        |
|                               |                                                                                                                                                                                                                                                                                                                                                                                                                                                                                         |

SCHOLARONE™  
Manuscripts

Only

1  
2  
3 **HOW PEOPLE FIT IN AT WORK: A SYSTEMATIC REVIEW OF THE ASSOCIATION**  
4  
5 **BETWEEN PERSON-ORGANISATION AND PERSON-GROUP FIT WITH STAFF**  
6  
7 **OUTCOMES IN HEALTHCARE**  
8  
9

10  
11 **Herkes, J<sup>\*1</sup>**

12  
13 **Churruca, K<sup>1</sup>**

14  
15 **Ellis, LA<sup>1</sup>**

16  
17 **Pomare, C<sup>1</sup>**

18  
19 **Braithwaite, J<sup>1</sup>**  
20  
21  
22

23  
24 <sup>1</sup>Centre for Healthcare Resilience and Implementation Science, Australian Institute of Health  
25  
26 Innovation, Macquarie University.  
27  
28

29  
30  
31 \*Corresponding Author

32  
33 [jess.herkes@mq.edu.au](mailto:jess.herkes@mq.edu.au)

34  
35 Level 6, 75 Talavera Rd

36  
37 Macquarie University  
38  
39

40  
41 Word count: 3340  
42  
43  
44  
45  
46  
47  
48  
49  
50  
51  
52  
53  
54  
55  
56  
57  
58  
59  
60

## ABSTRACT

**Objectives:** People interact with their workplace and organisation through being, to a greater or lesser extent, compatible with aspects of their setting. This interaction between person and environment is particularly relevant in healthcare settings where compatibility affects not only the healthcare professionals who deliver care but also potentially the patient who receives care. One way to understand this phenomenon is to examine the association between person-organisation (P-O) fit, and person-group (P-G) fit. The aim of this systematic review was to identify and synthesise knowledge on both P-O and P-G fit in healthcare to determine their association with staff outcomes. It was hypothesised that there would be a positive relationship between fit and staff outcomes, such that the experience of compatibility and ‘fitting in’ would be associated with better staff outcomes.

**Design:** A systematic review was conducted based on an extensive search strategy guided by PRISMA to identify relevant literature.

**Results:** Following an abstract and full-text review against the inclusion criteria, 24 articles were retained. Of these, 95.8% (23/24) reported a significant, positive association between perception of fit and staff outcomes in healthcare contexts, such that a sense of compatibility had various positive implications for staff, including job satisfaction and retention.

**Conclusions:** Evidence suggested an association between employees’ perceived compatibility with the workplace or organisation and a variety of staff outcomes in healthcare settings.

## ARTICLE SUMMARY

### Strengths and Limitations of the study

- Systematic review is specific to healthcare, in contrast to previous reviews in the field of fit research.
- Focus specifically on the components of person-environment fit that contribute to organisational and workplace culture in healthcare settings.

- 1  
2  
3 - Results of this review can be leveraged to inform improvements in staff outcomes.  
4  
5  
6

### 7 **Competing Interests**

8  
9 The authors have no conflicts of interest to disclose.  
10  
11  
12

### 13 **Funding**

14  
15 JH was funded by a Research Training Program Master of Research (RTPMRES) stipend  
16 scholarship at Macquarie University. JB is supported by multiple NHMRC grants.  
17  
18  
19  
20  
21

### 22 **Authorship**

23  
24 JH conceptualised and drafted the manuscript and was involved in the search strategy with KC and  
25 CP. KC, LAE and JB edited the manuscript and critically reviewed its intellectual content. All  
26 authors approve of the final version of the manuscript.  
27  
28  
29  
30  
31  
32  
33  
34  
35  
36  
37  
38  
39  
40  
41  
42  
43  
44  
45  
46  
47  
48  
49  
50  
51  
52  
53  
54  
55  
56  
57  
58  
59  
60

1  
2  
3 **HOW PEOPLE FIT IN AT WORK: A SYSTEMATIC REVIEW OF THE ASSOCIATION**  
4  
5 **BETWEEN PERSON-ORGANISATION AND PERSON-GROUP FIT WITH STAFF**  
6  
7 **OUTCOMES IN HEALTHCARE**  
8  
9  
10

11 How do people fit into their workplace environment, organisation, or group? This is a key aspect to  
12 understanding organisational and workplace cultures in healthcare settings.[1-3] Research  
13 increasingly attempts to make sense of how shared attitudes, values, beliefs and practices can have  
14 downstream effects on outcomes such as productivity and staff retention.[4, 5] In healthcare  
15 contexts, culture holds consequences for both staff and patients.[2, 6] The ways in which people  
16 experience their organisational and workplace cultures, both in healthcare and other contexts, is  
17 intrinsic to this problem, with many culture improvement interventions being designed and  
18 implemented.[7-10] However, the components of effective culture change have not been sufficiently  
19 teased out, and this may be a contributing factor to explain why interventions have a failure rate as  
20 high as 70%.[11] Thus, we need to understand how people interact with their environment, and how  
21 culture change strategies can be more efficiently and sustainably implemented in the light of this  
22 knowledge.[12] The person-environment (P-E) fit paradigm provides one such research avenue to  
23 further understand culture, focusing on *how people perceive themselves in relation to their work*  
24 *environment*. The P-E fit theory describes the compatibility of the individual and an aspect of their  
25 work context; for example, fit with the job, supervisor, group, organisation or vocation.[13-15]  
26  
27  
28  
29  
30  
31  
32  
33  
34  
35  
36  
37  
38  
39  
40  
41  
42  
43

44 Past reviews of P-E fit, although useful in highlighting the relevance of the topic, have  
45 synthesised information from across other industries,[16] limiting the utility of these findings to  
46 healthcare specifically. Uniquely, the presence of patients and the caring role of health providers  
47 creates an important point of departure from other contexts. While there have been quite a range of  
48 studies investigating P-E specifically in healthcare settings (such as hospitals,[17] pharmaceutical  
49  
50  
51  
52  
53  
54  
55  
56  
57  
58  
59  
60

1  
2  
3 distribution firms,[16] and elderly care facilities,[18]) examining outcomes more typically associated  
4 with caring work (e.g., burnout), these findings have not yet been rigorously synthesised.[15, 19-21]  
5  
6

7 Additionally, past systematic reviews on the fit concept have tended to focus exclusively on  
8 compatibility between employees and one element of their environment, such as the person-  
9 organisation (P-O) or person-group (P-G) fit,[15, 19, 20] or alternatively examined P-E fit as a  
10 whole, without differentiation of components such as group or vocation fit.[14] These approaches do  
11 not, therefore, account for the possible interactions among different types of fit (i.e., employees may  
12 simultaneously experience different levels of fit with their organisation, their supervisor, and their  
13 work group). In particular, there is evidence to suggest that organisational cultures and work group  
14 subcultures may interact with and influence one another.[22] In P-E fit research, we can measure the  
15 interacting individual and contextual factors that determine the compatibility of an individual  
16 employee with his or her organisation and work group; these are known as person-organisation (P-O)  
17 and person-group (P-G) fit respectively.[23] This emerges if: 1) at least one entity fulfils the needs of  
18 the other; 2) they share similar characteristics; or 3) both 1) and 2) occur.[15] **Table 1** offers  
19 definitions of the commonly identified components of P-E fit (including supplementary,  
20 complementary, needs-supplies and demands-abilities fit) in the literature.  
21  
22  
23  
24  
25  
26  
27  
28  
29  
30  
31  
32  
33  
34  
35  
36  
37  
38  
39  
40  
41  
42  
43

44 **[Insert Table 1 here]**  
45  
46  
47  
48  
49  
50  
51  
52  
53  
54  
55  
56  
57  
58  
59  
60

In research investigating P-E fit, one of the most important downstream effects to consider is the  
impact of fit perceptions on the staff themselves. Although the aim of studying organisational culture  
in healthcare is often ultimately to improve patient outcomes, employees are the first point of  
reference in attempts to alter, modify and ultimately transform organisational culture.[24-31] Staff  
outcomes are particularly important to understand in healthcare settings because of the frequent  
reports of employee burnout, stress, intent to leave and turnover (see **Figure 1** for a graphical

1  
2  
3 depiction).[32-36] By first understanding the factors, such as P-E fit that influence these outcomes in  
4 healthcare settings, initiatives may be developed to improve staff well-being or reduce, for example,  
5 negative organisational cultures.[24-31]  
6  
7  
8  
9

10  
11 **[Insert Figure 1 here]**  
12  
13

14  
15  
16 In the present systematic review, available evidence for the compatibility of staff with the culture of  
17 their organisation or workplace, and the effect of this compatibility on staff outcomes, is examined  
18 for the first time in healthcare settings. Because of their broader applicability to organisational and  
19 workplace cultures, it was decided that both P-O and P-G fit would be examined. Therefore, the aim  
20 of this systematic review was to *investigate the extent to which P-O and P-G fit are associated with*  
21 *staff outcomes in healthcare settings*. It was postulated that the majority of studies would show a  
22 positive relationship between fit and staff outcomes, such that increased fit would be associated with  
23 improved outcomes for staff.  
24  
25  
26  
27  
28  
29  
30  
31  
32  
33  
34

## 35 **METHODS**

### 36 **Eligibility criteria**

37  
38 All types of empirical study were considered, including longitudinal and cross-sectional analysis,  
39 quantitative, qualitative and mixed-methods designs. Each of these methods, if conducted in a valid  
40 and rigorous way, had the potential to provide insights by which to address the study's aim.  
41  
42 Inclusion was limited to peer-reviewed articles published in academic journals. Additionally, all  
43 types of "healthcare" settings were eligible for inclusion in the review, encompassing any front-line  
44 clinical environment where health professionals (including clinicians, nurses, allied health  
45 professionals, paramedics and pharmacists) directly interact with patients, residents, or  
46 consumers.[2]  
47  
48  
49  
50  
51  
52  
53  
54  
55  
56  
57  
58  
59  
60



### Information sources

Relevant databases were identified for searching: CINAHL Complete, EMBASE, Ovid MEDLINE, PsycINFO and Scopus. To ensure the maximum number of relevant research articles were included in the review, a date restriction was not applied. The general search strategy (**Table 2**) was cross-checked with related systematic reviews to ensure relevant keywords were incorporated.[4, 5] The initial search was conducted on April 3, 2017 and the results were imported into EndNote.[37] Additionally, snowballing was conducted as systematic, narrative, or scoping reviews were identified and their reference lists searched for other potential articles to include. The reference lists of included articles were subject to the same process.

[Insert Table 2 here]

### Selection and data collection process

Guided by the Preferred Reporting Items for Systematic review and Meta-Analyses (PRISMA) statement,[38] an initial title and abstract review was completed based on the inclusion criteria (English language, healthcare context, published peer-reviewed journal article, addresses the aim of the review). A full text review was then conducted. Results were summarised and synthesised. Included articles were sorted according to the data type, setting, staff outcomes measured, and types of fit studied.

### Data items

The systematic review aimed to include different components of fit within P-G and P-O fit. Hence, the search strategy encompassed general terms (e.g., “person-organisation fit”) as well as more specific terms (e.g., “supplementary”).[15, 19] The search strategy also endeavoured to identify staff

1  
2  
3 outcomes, including but not limited to work attitude,[20, 39] staff satisfaction,[30] burnout,[26-28]  
4  
5 work stress,[25, 29, 40, 41] and organisational commitment.[31]  
6  
7

### 8 9 **Bias**

10  
11 It was anticipated that there would be biases in individual studies. The Quality Assessment Tool[42]  
12  
13 was used to assess the bias and quality across nine categories. Each category was rated on a four-  
14  
15 point scale (from 1="very poor" to 4="good) to create a total score, with higher scores denoting  
16  
17 higher quality.[6, 43] There was also possible bias in the type of results published, for example,  
18  
19 publication bias.[44]  
20  
21  
22  
23

## 24 **RESULTS**

### 25 **Study selection**

26  
27 Four hundred and twenty-five articles were identified from the database search and snowballing  
28  
29 techniques. Duplicates were deleted and the remaining articles were screened. Two authors (JH and  
30  
31 CP) independently reviewed 5% of the EndNote Library, and then discussed results until consensus  
32  
33 was reached. Cohen's Kappa statistic was 0.84, indicating substantial agreement.[45] The remaining  
34  
35 articles were screened by JH. Two hundred and one texts did not meet the inclusion criteria, and the  
36  
37 remaining 71 articles were subjected to full-text review (**Figure 2**). Ultimately, 24 articles were  
38  
39 included in the review.  
40  
41  
42  
43  
44  
45

46 **[Insert Figure 2 here]**  
47  
48  
49

### 50 **Risk of bias in individual studies**

51  
52 Based on the Quality Assessment Tool,[42] the included articles scored between 23-36 points out of  
53  
54 a potential 36 points. The classification system quality grades facilitates the categorisation of articles  
55  
56  
57  
58  
59

1  
2  
3 as low (9-23 points), medium (24-29 points) and high (30-36 points).[46] In this study, there were  
4 three low, two medium and 19 high quality articles.[6] For complete classification of each article,  
5 see **Appendix 2** in the Supplementary File.  
6  
7  
8  
9

### 10 11 **Study characteristics**

12  
13 The articles in the final analysis originated from multiple countries, including nine from the United  
14 States of America (USA),[18, 47-54] four from Canada,[55-58] two from Spain,[59, 60] and one  
15 each from China,[61] Germany,[62] Greece,[63] Turkey,[64] Korea,[65] the Netherlands,[66] New  
16 Zealand,[67] Norway,[68] and the United Kingdom.[24] There were also differences in the study  
17 setting, though the largest proportion of research was conducted in hospitals (54%) (**Table 3**).  
18  
19  
20  
21  
22  
23  
24  
25

26  
27 **[Insert Table 3 here]**  
28  
29  
30

31 The included studies differed in their design. Of the 24 articles, five were longitudinal,[47, 50, 53,  
32 62, 66] and the remaining 19 were cross-sectional. The sample size varied considerably, from 56[68]  
33 to 2,563 participants.[57] Additionally, the type of participants varied. The most commonly recruited  
34 participants were nurses, followed by physicians. Further information about the specific  
35 characteristics of each study is reported in **Appendix 3** of the Supplementary File.  
36  
37  
38  
39  
40

41 Trends in publication of the included articles provide an insight into the potential of future  
42 research examining fit in healthcare. Only two of the 24 included articles were published before the  
43 year 2000, with the majority being published after 2010 (**Figure 3**).  
44  
45  
46  
47  
48  
49

50  
51 **[Insert Figure 3 here]**  
52  
53  
54  
55  
56  
57  
58  
59  
60

## Synthesis of results

Twenty articles exclusively measured P-O fit, two measured P-G fit, and two measured both P-O and P-G fit. The articles measuring P-G fit measured only supplementary value congruence. On the other hand, P-O fit articles measured various components of fit. The strength of the evidence for both P-O and P-G fit is examined in turn, before discussing the inferences for fit research as a whole.

### Articles measuring P-G fit

In the included studies, P-G fit, that is, the compatibility a healthcare staff member experiences with their work group, was only measured through value congruence, whereby the similarity of values between the individual and the group are measured. All four articles identified in this category also measured similar staff outcomes, namely job satisfaction[49, 53, 64, 68] and turnover intent,[49, 53, 64] although one also measured employee attitude and time pressure.[68] In all of these articles, increased value congruence was significantly positively associated with job satisfaction, and negatively associated with intention to leave the job.[49, 53, 64, 68] However, Dotson et al. [49] counter-intuitively reported that value congruence was *positively* associated with intent to leave the entire nursing profession; the authors speculated this may have been due to a lack of fulfilment of altruistic values in the nursing field, as well as external financial or bureaucratic pressures. Overall, the four studies indicated a relationship between P-G value congruence and staff outcomes, particularly a positive relationship with job satisfaction and a negative relationship with turnover intent.

### Articles measuring P-O fit

In contrast to P-G fit, P-O fit, the compatibility a healthcare staff member experiences with their organisation, was measured more frequently and in terms of various components of fit. Different ways of measuring some or all of the components were present in the 22 P-O fit articles (20 that

solely measured P-O fit and two that also measured P-G fit). **Table 4** reports on what authors purported to measure in their P-O fit studies.

[Insert Table 4 here]

Supplementary fit was the most commonly measured component of P-O fit in healthcare literature.[14, 15, 69, 70] P-O supplementary value congruence was measured in 18 studies. Seven articles measured value congruence through the Areas of Worklife Scale (AWS)[71] where “values” was one of six components the scale measured.[47, 53, 55-58, 60] Consequently, “fit” or “compatibility” was not the main focus of these articles, but they still reported the correlations with outcomes including burnout,[47, 55-58, 60] turnover intent,[58] and job satisfaction[54] in a variety of healthcare settings, including hospitals[54-56, 60] and acute care facilities.[58] The remaining survey tools measuring P-O value congruence were heterogeneous, with three studies[48, 59, 66] using the Perceived Fit Scale from Cable and DeRue [72], four studies deriving their survey questions from other sources,[52, 59, 63, 65] and five studies using tools crafted specifically for that study.[18, 49-51, 64] The heterogeneity of tools and study contexts made it difficult to compare across studies. However, collectively these studies suggested there are several valid ways to measure P-O supplementary value fit and their associations with staff outcomes.

Personality congruence was measured in two studies, one of which also measured knowledge, skills and abilities (KSA) congruence. Cha et al. [65] measured personality congruence under the heading of “prosocial P-O fit”, whereby high scores on personal and prosocial identities (in other words, high personality congruence) was associated with higher organisational citizenship and caring behaviour from hospital employees. However, they reported an unexpected link between the misfit of the person and organisation with prosocial behaviour, such that an individual would be intrinsically motivated to engage in these behaviours even if the organisation did not actively

1  
2  
3 encourage them. Similarly, the study measuring P-O KSA and personality congruence found that the  
4 overall measure of P-O fit was significantly associated with both job satisfaction and turnover  
5 intention.[64] However, personality and KSA congruence were not analysed separately, so there was  
6 not enough evidence to deduce the strength of the association between each type of congruence  
7 individually with staff outcomes.  
8  
9  
10  
11  
12

13  
14 Supplementary goal congruence was measured in one study of job strain amongst aged care  
15 workers, where Schmidt [62] found that goal incongruence was related to absenteeism and self-  
16 reported burnout. As there was only one study on goal congruence, it was difficult to draw  
17 conclusions regarding this particular component of supplementary fit.  
18  
19  
20  
21

22  
23 Two studies did not specify the aspect of supplementary fit that they measured. Hatton et al.  
24 [24] used an “ideal-real” organisational culture tool to test the congruence between employee’s  
25 perceptions of their organisation compared to those of an “ideal” organisation. It could not be  
26 determined from the original scale which component or components of supplementary fit were  
27 examined. The second study measuring an unspecified component of supplementary fit was also the  
28 sole article reporting a measure of complementary fit. Reportedly, each fit component  
29 (supplementary and complementary) was measured through four items.[67] However, upon review  
30 of the original survey items, it became apparent that the complementary fit scale consisted of items  
31 that would be defined as different elements of fit (needs-supplies and supplementary).[73] This  
32 combination of items made it difficult to draw theoretical conclusions from the study. Although  
33 general complementary fit itself was not measured, this article indicates the potential importance of  
34 needs-supplies P-O fit.  
35  
36  
37  
38  
39  
40  
41  
42  
43  
44  
45  
46  
47

48  
49 Zhang et al. [61] reported that needs-supplies P-O fit was directly associated with job  
50 satisfaction, as well as significantly inversely associated with intent to leave among community  
51 health workers in China. These results aligned with those of Cooper-Thomas et al. [67] who reported  
52 a significant positive correlation of P-O fit with job satisfaction and organisational commitment, and  
53  
54  
55  
56  
57  
58  
59  
60

1  
2  
3 a negative correlation with intention to quit. Moreover, both studies reported that job satisfaction  
4 partially mediated the relationship between needs-supplies P-O fit and intention to quit.  
5  
6  
7

#### 8 9 Articles measuring P-O and P-G fit

10  
11 There was a dearth of research examining P-O and P-G fit together in healthcare, limiting knowledge  
12 regarding their relationship. Of the two articles purporting to measure both P-O and P-G fit, it  
13 appeared that based on the items used, one rigorously measured only P-O fit,[64] and the other did  
14 not delve into the fit framework, but rather measured P-O and P-G value congruence.[49] As such, it  
15 was not possible to draw any reasonable conclusions on the potential interactional effect between P-  
16 O and P-G fit on staff outcomes in health environments.  
17  
18  
19  
20  
21  
22  
23  
24  
25

#### 26 Staff outcomes measured

27  
28 In addition to the variability amongst the type of fit studied, there was also variation in the staff  
29 outcomes measured. These main outcome groups included satisfaction, intention to quit,  
30 organisational commitment, burnout, and absenteeism (**Table 5**).  
31  
32  
33  
34  
35  
36

37  
38 **[Insert Table 5 here]**  
39  
40

#### 41 Overall findings

42  
43 Overall, 95.8% of included articles (23/24) reported a significant, positive relationship between P-O  
44 or P-G fit and staff outcomes, such that greater compatibility with one's workplace or organisation  
45 was associated with more positive outcomes for staff (e.g., lower levels of burnout, increased  
46 satisfaction). Of these, 18 articles reported an exclusively positive relationship, showing that the  
47 relationship between fit and each measured staff outcome was in the direction hypothesised. A  
48 further five articles reported a partially positive relationship; in other words, some staff outcomes  
49  
50  
51  
52  
53  
54  
55  
56  
57  
58  
59  
60

1  
2  
3 had a significant association with fit in the direction hypothesised, but the association with other  
4  
5 outcomes did not reach a level of statistical significance (e.g., a reported positive association  
6  
7 between measures of fit and job satisfaction and loyalty, but no association with turnover).[63]  
8  
9 Finally, one article reported no significant association between the two entities (namely, P-O value  
10  
11 fit and actual turnover).[66]  
12  
13  
14  
15

## 16 **DISCUSSION**

17  
18 The results of this review provided robust evidence for the initial postulation that stronger P-O fit,  
19  
20 and to a lesser extent P-G fit, would be associated with more positive outcomes, such as increased  
21  
22 organisational commitment and job satisfaction, and decreased intent to quit, burnout, and stress.  
23  
24 Even with a relatively small number of P-G fit articles compared with P-O fit articles, the trend  
25  
26 across the results suggests the importance of *both* constructs in increasing an individuals' perception  
27  
28 of fit, and that this is conducive to better staff outcomes in healthcare. Hence, this review highlights  
29  
30 the importance for people's well-being in feeling a sense of fit with both their work-group and their  
31  
32 wider organisation—a result that confirms previous results from systematic reviews not conducted in  
33  
34 healthcare.[15, 74] Specifically, evidence suggests the importance of similar values between  
35  
36 individuals and their workplace and organisation.[18, 49, 51-53, 57, 68] Not only may this have  
37  
38 positive downstream effects on the employees themselves, but it also has the potential to positively  
39  
40 impact on the outcomes they produce in the work environment which, in healthcare, equates to better  
41  
42 patient care.[6]  
43  
44  
45

46 Research regarding the process of individual adaption to the work context is growing,[75, 76]  
47  
48 which will add richness to the understanding of how to most effectively foster perceived fit and  
49  
50 improve cultures in healthcare settings. This review will, we hope, offer welcome guidance to  
51  
52 policymakers, managers and other custodians of organisational culture in healthcare on the  
53  
54  
55  
56  
57  
58  
59  
60



1  
2  
3 importance of enhancing fit perceptions, which may lead to improved staff outcomes in health  
4 settings. Ultimately, such strategies aim to increase mutually beneficial fit at work.  
5  
6

7 The results have important implications for clinicians, allied health professionals, healthcare  
8 managers, and policymakers involved in the development and implementation of culture change  
9 interventions. Most apparently, they suggest the importance of individuals being motivated to seek  
10 work at organisations that hold similar values and goals to their own.[49, 77] Alternatively, in the  
11 case of employed individuals being incompatible with the workplace or organisation, the results  
12 suggest the importance of bridging this gap.[78-80] The systematic review is the first in the context  
13 of healthcare to highlight the mutual benefit of adaption and flexibility of both the individual and the  
14 environment, in order to create better fit between health care staff and the places they work, which  
15 may also potentially improve patient care.  
16  
17  
18  
19  
20  
21  
22  
23  
24  
25  
26  
27  
28

### 29 **Strengths and limitations**

30  
31 There are several strengths and limitations to this study. The review searched multiple databases, and  
32 was thorough and rigorous, applying PRISMA methodology, and assessing bias and quality. Bias is  
33 unavoidable, and thus readers should be mindful of this potential bias when judging the strength of  
34 evidence for the association between P-O and P-G fit with staff outcomes. Additionally, the included  
35 articles were inconsistent and heterogeneous in their labelling and measuring of fit. For example,  
36 some articles measured value congruence but did not explain the wider concept of supplementary  
37 fit,[55, 60] whilst others specified this information.[48, 66] This meant we had to make some choices  
38 regarding the identification and grouping of articles for this review. In the future, empirical studies of  
39 P-O and P-G fit in health settings could address these limitations by explicitly identifying what facet  
40 of fit they are studying, and linking this to their measurement tool.  
41  
42  
43  
44  
45  
46  
47  
48  
49  
50  
51  
52  
53  
54  
55  
56  
57  
58  
59  
60

## CONCLUSION

The results of this systematic review indicate that fitting in at work is conducive to improved staff outcomes. The results argue in favour of the intrinsic benefit of improving staff well-being. Moreover, there is the potential added benefit of learning how to enhance organisational cultures, within which people fit or do not fit, which may have downstream effects on patient care.

For peer review only

## REFERENCES

1. Braithwaite J. A lasting legacy from Tony Blair? NHS culture change. *J R Soc Med.* 2011;104(2):87-9.
2. Braithwaite J, Herkes J, Ludlow K, Lamprell G, Testa L. The association between organisational and workplace cultures, and patient outcomes: systematic review protocol. *BMJ Open.* 2016;6(12):e013758.
3. Braithwaite J, Hyde P, Pope C. *Culture and Climate in Health Care Organizations.* Basingstoke, London: Palgrave Macmillan; 2010.
4. Parmelli E, Flodgren G, Beyer F, Baillie N, Schaafsma ME, Eccles MP. The effectiveness of strategies to change organisational culture to improve healthcare performance: a systematic review. *Implement Sci.* 2011;6(1):1-8.
5. MacDavitt K, Chou S, Stone P. Organizational climate and health care outcomes. *Jt Comm J Qual Patient Saf.* 2007;33:45-56.
6. Braithwaite J, Herkes J, Ludlow K, Testa L, Lamprell G. The association between organisational and workplace cultures, and patient outcomes: systematic review. *BMJ Open.* 2017;7(11):e017708.
7. Higgins J, Altman D, Sterne J. Chapter 8: assessing risk of bias in included studies. In: Higgins J, Green S, editors. *Cochrane Handbook for Systematic Reviews of Interventions Version 5.1.0: The Cochrane Collaboration; 2011.*
8. Larson E, Early E, Cloonan P, Sugrue S, Parides M. An organisational climate intervention associated with increased handwashing and decreased nosocomial infections. *J Behav Med.* 2000;26(1):14-22.
9. Nosrati H, Clay-Williams R, Cunningham F, Hillman K, Braithwaite J. The role of organisational and cultural factors in the implementation of system-wide interventions in acute hospitals to improve patient outcomes: protocol for a systematic literature review. *BMJ Open.* 2013;3(3):e002268.
10. Sacks G, Shannon E, Dawes A, Rollo J, Nguyen D, Russell M, et al. Teamwork, communication and safety climate: a systematic review of interventions to improve surgical culture. *BMJ Qual Saf.* 2015;24(7):458-67.
11. Nohria N, Beer M. Cracking the code of change. *Harv Bus Rev.* 2000(May-June).
12. Isouard G. Leading and managing the implementation process: the key to successful national health reform. *APJHM.* 2010;5(1):11-6.
13. Morley M. Person-organization fit. *J Manag Psychol.* 2007;22(2):109-17.
14. Kristof-Brown A, Guay R. Person-environment fit. In: Zedeck S, editor. *APA Handbook of Industrial and Organizational Psychology: Maintaining, Expanding, and Contracting the Organization.* 3: American Psychological Association; 2011. p. 3-50.
15. Kristof A. Person-organization fit: an integrative review of its conceptualizations, measurement, and implications. *Pers Psychol.* 1996;49:1-49.
16. Cennamo L, Gardner D. Generational differences in work values, outcomes and person-organisation values fit. *J Manage Psychol.* 2008;23(8):891-906.
17. Parkes L, Bochner S, Schneider S. Person-organisation fit across cultures: an empirical investigation of individualism and collectivism. *Appl Psychol Int Rev.* 2001;50(1):81-108.
18. Ren T, Hamann DJ. Employee value congruence and job attitudes: the role of occupational status. *Pers Rev.* 2015;44(4):550-66.
19. Piasentin K, Chapman D. Subjective person-organization fit: bridging the gap between conceptualization and measurement. *J Vocat Behav.* 2006;69:202-21.
20. Verquer M, Beehr T, Wagner S. A meta-analysis of relations between person-organization fit and work attitudes. *J Vocat Behav.* 2003;63:473-89.

21. dos Santos L, De Domenico S. Person-organization fit: bibliometric study and research agenda. *Eur Bus Rev.* 2015;27(6):573-92.
22. Vogel R, Feldman D. Integrating the levels of person-environment fit: the roles of vocational fit and group fit. *J Vocat Behav.* 2009;75:68-81.
23. Chatman J. Improving interactional organizational research: A model of person-organization fit. *The Academy of Management Review.* 1989;14(3):333-49.
24. Hatton C, Rivers M, Mason H, Mason L, Emerson E, Kiernan C, et al. Organizational culture and staff outcomes in services for people with intellectual disabilities. *J Intellect Disabil Res.* 1999;43(3):206-18.
25. Edwards D, Burnard P, Coyle D, Fothergill A, Hannigan B. Stress and burnout in community mental health nursing: a review of the evidence. *J Psychiatr Ment Health Nurs.* 2000;7:7-14.
26. Fong T, Ho R, Au-Yeung F, Sing C, Law K, Lee L, et al. The relationships of change in work climate with changes in burnout and depression: a 2-year longitudinal study of Chinese mental health care workers. *Psychol Health Med.* 2016;21(4):401-12.
27. Kilroy A, Flood P, Bosak J, Chenevert D. Perceptions of high-involvement work practices, person-organization fit, and burnout: a time-lagged study of health care employees. *Hum Resour Manage.* 2016:1-15.
28. Maslach C, Jackson S. The measurement of experienced burnout. *J Occup Behav.* 1981;2:99-113.
29. Shinn M, Rosario M, Morch H, Chestnut D. Coping with job stress and burnout in the human services. *J Pers Soc Psychol.* 1984;46(4):864-76.
30. Chen P, Sparrow P, Cooper C. The relationship between person-organization fit and job satisfaction. *J Manage Psychol.* 2016;31(5):946-59.
31. Kinjerski V, Skrypnik B. The promise of spirit at work: increasing job satisfaction and organizational commitment and reducing turnover and absenteeism in long-term care. *J Gerontol Nurs.* 2008;34(10):17-25.
32. Grunfeld E, Whelan T, Zitzelsberger L, Willan A, Montesanto B, Evans W. Cancer care workers in Ontario: prevalence of burnout, job stress and job satisfaction. *Can Med Assoc J.* 2000;163(2):166-9.
33. Chew J, Chan C. Human resource practices, organizational commitment and intention to stay. *Int J Manpower.* 2008;29(6):503-22.
34. Piasentin K, Chapman D. Perceived similarity and complementarity as predictors of subjective person-organization fit. *J Occup Organ Psychol.* 2007;80:341-54.
35. Gould-Williams J, Mostafa A, Bottomley P. Public service motivation and employee outcomes in the Egyptian public sector: testing the mediating effect of person-organization fit. *J Public Adm Res Theory.* 2015;25(2):597-622.
36. Mostafa A, Gould-Williams J. Testing the mediation effect of person-organization fit on the relationship between high performance HR practices and employee outcomes in the Egyptian public sector. *Int J Hum Resour Man.* 2014;25(2):276-92.
37. Analytics C. Endnote. Endnote.
38. Moher D, Liberati A, Tetzlaff J, Altman D. Preferred Reporting Items for Systematic Reviews and Meta-Analyses: the PRISMA statement. *PLoS Med.* 2009;6(7):e1000097.
39. Warr P, Cook J, Wall T. Scales for the measurement of some work attitudes and aspects of psychological well-being. *Occup Psychol.* 1979;52:129-48.
40. Ramirez AJ, Graham J, Richards MA, Cull A, Gregory WM. Mental health of hospital consultants: the effects of stress and satisfaction at work. *Lancet.* 1996;347:724-8.
41. Ward L. Mental health nursing and stress: maintaining balance. *Int J Ment Health Nurs.* 2011;20:77-85.
42. Hawker S, Payne S, Kerr C, Hardey M, Powell J. Appraising the evidence: reviewing disparate data systematically. *Qual Health Res.* 2002;12(9):1284-99.

- 1
- 2
- 3 43. Taylor N, Clay-Williams R, Hodgen E, Braithwaite J, Groene O. High performing hospitals: a qualitative systematic review of associated factors and practical strategies for improvement. *BMC Health Serv Res.* 2015;15:244-66.
- 4
- 5
- 6 44. Dickersin K. The existence of publication bias and risk factors for its occurrence. *JAMA.* 1990;263:1385-9.
- 7
- 8 45. Landis J, Koch G. The measurement of observer agreement for categorical data. *Biometrics.* 1977;33(1):159-74.
- 9
- 10 46. Lorenc T, Petticrew M, Whitehead M, Neary D, Clayton S, Wright K, et al. Appendix 5: quality assessment for the systematic review of qualitative evidence. *Crime, Fear of Crime and Mental Health: Synthesis of Theory and Systematic Reviews of Interventions and Qualitative Evidence.* Public Health Research, No. 2.2. Southampton, United Kingdom: NIHR Journals Library; 2014.
- 11
- 12
- 13
- 14
- 15
- 16 47. Gregory ST, Menser T. Burnout among primary care physicians: a test of the areas of worklife model. *J Healthc Manag.* 2015;60(2):133-48.
- 17
- 18 48. Rehffuss MC, Gambrell CE, Meyer D. Counselors' perceived person-environment fit and career satisfaction. *Career Dev Q.* 2012;60:145-51.
- 19
- 20 49. Dotson MJ, Dave DS, Cazier JA, Spaulding TJ. An empirical analysis of nurse retention. *J Nurs Adm.* 2014;44(2):111-6.
- 21
- 22 50. Somers MJ. Patterns of attachment to organizations: commitment profiles and work outcomes. *J Occup Organ Psychol.* 2010;83(2):443-53.
- 23
- 24 51. Ren T. Sectoral differences in value congruence and job attitudes: the case of nursing home employees. *J Bus Ethics.* 2013;112(2):213-24.
- 25
- 26 52. Kalliath TJ, Bluedorn AC, Strube MJ. A test of value congruence effects. *J Organ Behav.* 1999;20(7):1175-98.
- 27
- 28 53. Gates MG, Mark BA. Demographic diversity, value congruence, and workplace outcomes in acute care. *Res Nurs Health.* 2012;35(3):265-76.
- 29
- 30 54. Risman KL, Erickson RJ, Diefendorff JM. The impact of person-organization fit on nurse job satisfaction and patient care quality. *Appl Nurs Res.* 2016;31:121-5.
- 31
- 32 55. Leiter M, Day A, Price L. Attachment styles at work: measurement, collegial relationships, and burnout. *Burn Res.* 2015;2(1):25-35.
- 33
- 34 56. Leiter MP. A two process model of burnout and work engagement: distinct implications of demands and values. *G Ital Med Lav Ergon.* 2008;30(1 Suppl A):A52-A8.
- 35
- 36 57. Leiter MP, Frank E, Matheson TJ. Demands, values, and burnout: relevance for physicians. *Can Fam Physician.* 2009;55(12):1224-6.
- 37
- 38 58. Leiter MP, Jackson NJ, Shaughnessy K. Contrasting burnout, turnover intention, control, value congruence and knowledge sharing between Baby Boomers and Generation X. *J Nurs Manag.* 2009;17(1):100-9.
- 39
- 40 59. Bao Y, Vedina R, Moodie S, Dolan S. The relationship between value incongruence and individual and organizational well-being outcomes: an exploratory study among Catalan nurses. *J Adv Nurs.* 2013;69(3):631-41.
- 41
- 42 60. Leiter MP, Gasco'n S, Mart'inez-Jarreta B. Making sense of work life: a structural model of burnout. *J Appl Soc Psychol.* 2010;40(1):57-75.
- 43
- 44 61. Zhang M, Yan F, Wang W, Li G. Is the effect of person-organisation fit on turnover intention mediated by job satisfaction? A survey of community health workers in China. *BMJ Open.* 2017;7(2):e013872.
- 45
- 46 62. Schmidt KH. The relation of goal incongruence and self-control demands to indicators of job strain among elderly care nursing staff: a cross-sectional survey study combined with longitudinally assessed absence measures. *Int J Nurs Stud.* 2010;47(7):855-63.
- 47
- 48 63. Bellou V. Matching individuals and organizations: evidence from the Greek public sector. *Employee Relat.* 2009;31(5):455-70.
- 49
- 50
- 51
- 52
- 53
- 54
- 55
- 56
- 57
- 58
- 59
- 60

64. Findik M, Öğüt A, Çağlıyan V. An evaluation about person-organization fit, job satisfaction, and turnover intention: a case of health institution. *Mediterr J Soc Sci.* 2013;4(11):434-40.
65. Cha J, Chang YK, Kim T-Y. Person-organization fit on prosocial identity: implications on employee outcomes. *J Bus Ethics.* 2014;123(1):57-69.
66. Boon C, Biron M. Temporal issues in person-organization fit, person-job fit and turnover: the role of leader-member exchange. *Hum Relat.* 2016;69(12):2177-200.
67. Cooper-Thomas HD, Poutasi C. Attitudinal variables predicting intent to quit among Pacific healthcare workers. *Asia Pac J Hum Resour.* 2011;49(2):180-92.
68. Verplanken B. Value congruence and job satisfaction among nurses: a human relations perspective. *Int J Nurs Stud.* 2004;41(6):599-605.
69. Guan Y, Deng H, Risavy S, Bond M, Li F. Supplementary fit, complementary fit, and work-related outcomes: the role of self-construal. *Appl Psychol Int Rev.* 2010;60(2).
70. Mehtap O, Alniacik E. Can dissimilar be congruent as well as the similar? A study on the supplementary and complementary fit. *Procedia Soc Behav Sci.* 2014;150:1111-9.
71. Leiter MP, Maslach C. Areas of worklife: a structured approach to organizational predictors of job burnout. *Emotional and Physiological Processes and Positive Intervention Strategies: Research in Occupational Stress and Well Being.* 3: Elsevier Ltd.; 2004. p. 91-134.
72. Cable D, DeRue D. The convergent and discriminant validity of subjective fit perceptions. *J Appl Psychol.* 2002;87(5):875-84.
73. Saks A, Ashforth B. Is job search related to employment quality? It all depends on fit. *J Appl Psychol.* 2002;87(4):646-54.
74. Kristof-Brown A, Zimmerman R, Johnson E. Consequences of individuals' fit at work: a meta-analysis of person-job, person-organization, person-group, and person-supervisor fit. *Pers Psychol.* 2005;58:281-342.
75. Herkes J, Churrua K, Ellis LA, Braithwaite J, editors. Coordinating care across boundaries in mental health facilities: a qualitative approach to understanding perceptions of fit at work. *Organ Behav Health Care;* 2018, forthcoming 13-16 May; Montreal, Canada.
76. Ryan A, Kristof-Brown A. Focusing on personality in person-organization fit research: unaddressed issues. In: Barrick M, Ryan A, editors. *Personality and Work: Reconsidering the Role of Personality in Organizations.* 1 ed. San Francisco, CA: Jossey-Bass; 2003. p. 262-88.
77. McDonald P, Gandz J. Getting value from shared values. *Organ Dyn.* 1992;20(3):64-77.
78. Judge T, Cable D. Applicant personality, organizational culture, and organization attraction. *Pers Psychol.* 1997;50:359-94.
79. Lievens F, Decaestecker C, Coetsier P, Geiraert J. Organisational attractiveness for prospective applicants: a person-organisation fit perspective. *Appl Psychol Int Rev.* 2001;50(1):30-51.
80. Saks A, Ashforth B. A longitudinal investigation of the relationship between job information sources, applicant perceptions of fit, and work outcomes. *Pers Psychol.* 1997;50:395-426.
81. Yu K, Davis H. Autonomy's impact on newcomer proactive behaviour and socialization: a needs-supplies fit perspective. *J Occup Organ Psychol.* 2016;89:172-97.



Tables to be inserted into manuscript

Table 1. Important definitions of the components of P-O and P-G fit

| Term                             | Definition                                                                                                                     | Associated Key Terms                           |
|----------------------------------|--------------------------------------------------------------------------------------------------------------------------------|------------------------------------------------|
| Supplementary/<br>similarity fit | Compatibility in which the individual and the environment are congruent (e.g., similar values, personality or goals).[15, 19]  | Fit, congruence, similarity fit, compatibility |
| Complementary<br>fit             | Fit in which the individual or organisation fills a gap in, adds something unique to, or “makes whole” the other.[19, 21, 34]  | Uniqueness                                     |
| Needs-supplies<br>fit            | A feeling of fit in which the needs, inclinations or requirements of the person are fulfilled by the work environment.[15, 81] | Supplies-values fit*                           |
| Demands-<br>abilities fit        | Fit in which the individual has the capabilities and capacity to meet the demands of the environment.[15]                      | N.a.                                           |

Sources: [15, 19, 21, 34, 81].

\*For simplicity, this term will not be used in this review to describe needs-supplies fit.

**Table 2. General search strategy**

| <b>Keyword</b>     | <b>Related terms/synonyms</b>                                                                                                                                                                                                                                                                                                                                                                                                                                                                                                                                             | <b>Alternative terms</b>                                 |
|--------------------|---------------------------------------------------------------------------------------------------------------------------------------------------------------------------------------------------------------------------------------------------------------------------------------------------------------------------------------------------------------------------------------------------------------------------------------------------------------------------------------------------------------------------------------------------------------------------|----------------------------------------------------------|
| P-O and P-G fit    | Person*organisation fit OR supplementary fit OR complementary fit OR needs-supplies fit OR supplies-values fit OR demands-abilities fit OR supplementary congruence OR complementary congruence OR similarity fit OR value congruence OR goal congruence OR personality congruence OR person-group fit OR person-team fit                                                                                                                                                                                                                                                 | Organization                                             |
| Healthcare context | Health organisation* OR hospital* OR health facilit* OR acute care OR primary care OR primary health care OR health context OR health setting OR health service OR health*care OR tertiary care OR nurse* OR health profession* OR doctor OR GP OR physician* OR dentist* OR health OR health care service* OR gyn*ecologist* OR h*ematologist* OR internist* OR obstetrician* OR p*ediatrician* OR pharmacist* OR physiotherapist* OR psychiatrist* OR psychologist* OR radiologist* OR surgeon* OR surgery OR therapist* OR counse*lor* OR neurologist* OR optometrist* | Health care<br>Healthcare<br>Health-care<br>Organization |
| Staff outcomes     | Burnout OR staff outcome* OR job satisfaction OR staff satisfaction OR employee satisfaction OR employee outcome* OR retention OR staff recognition OR employee recognition OR intention to stay OR                                                                                                                                                                                                                                                                                                                                                                       | Organization                                             |



1  
2  
3  
4  
5  
6  
7  
8  
9  
10  
11  
12  
13  
14  
15  
16  
17  
18  
19  
20  
21  
22  
23  
24  
25  
26  
27  
28  
29  
30  
31  
32  
33  
34  
35  
36  
37  
38  
39  
40  
41  
42  
43  
44  
45  
46  
47

| Keyword | Related terms/synonyms                                                                                                                                                                                                                        | Alternative terms |
|---------|-----------------------------------------------------------------------------------------------------------------------------------------------------------------------------------------------------------------------------------------------|-------------------|
|         | intention to leave OR debrief* OR intent to turnover OR turnover intention OR organisation* commitment<br><br>OR stress OR work attitude OR occupational hazard* OR collegiality OR working relationship* OR<br><br>teamwork OR collaboration |                   |

The symbol \* is used by the databases to symbolise truncation.

At least one keyword was needed from each row.

For complete search strategy, please refer to **Appendix 1** in Supplementary File.

**Table 3. Setting of included studies in systematic review**

| Study setting             | Number of included studies conducted in this context |
|---------------------------|------------------------------------------------------|
| Hospitals                 | 11 <sup>a</sup>                                      |
| Elderly care facilities   | 4 <sup>b</sup>                                       |
| Acute care facilities     | 1 <sup>c</sup>                                       |
| Ambulatory care           | 1 <sup>d</sup>                                       |
| Disability services       | 1 <sup>e</sup>                                       |
| Community health          | 1 <sup>f</sup>                                       |
| No contextual information | 1 <sup>g</sup>                                       |
| Multiple settings         | 4 <sup>h</sup>                                       |

<sup>a</sup>[50, 52-56, 59, 60, 63, 65, 68].

<sup>b</sup>[18, 51, 62, 66].

<sup>c</sup>[58].

<sup>d</sup>[47].

<sup>e</sup>[24].

1  
2  
3  
4  
5  
6  
7  
8  
9  
10  
11  
12  
13  
14  
15  
16  
17  
18  
19  
20  
21  
22  
23  
24  
25  
26  
27  
28  
29  
30  
31  
32  
33  
34  
35  
36  
37  
38  
39  
40  
41  
42  
43  
44  
45  
46  
47

<sup>f</sup>[61].

<sup>g</sup>[64].

<sup>h</sup>[48, 49, 57, 67].

For peer review only

**Table 4. Number of studies reported for each type of P-O fit**

| <b>Component of P-O fit</b> |                                        | <b>Number of studies<sup>a</sup></b> |
|-----------------------------|----------------------------------------|--------------------------------------|
|                             | Value                                  | 18                                   |
|                             | Personality                            | 2                                    |
| Supplementary               | Knowledge, skills and abilities (KSA)  | 1                                    |
|                             | Goal                                   | 1                                    |
|                             | Unspecified                            | 2                                    |
|                             | <b>Total</b>                           | <b>21<sup>b</sup></b>                |
| Complementary               |                                        | 1                                    |
| Needs-supplies              |                                        | 1                                    |
| Demands-abilities           |                                        | 0                                    |
|                             | <b>Total studies measuring P-O fit</b> | <b>22<sup>c</sup></b>                |

<sup>a</sup>Studies may have reported measuring additional types of fit in different aspects of the P-E paradigm (e.g., Reh fuss et al. (2012) measured needs-supplies and demands-abilities P-J fit).[48] These are not relevant to the aims of this systematic review and not reported here.

1  
2  
3  
4  
5  
6  
7 <sup>b</sup>The total number of articles measuring supplementary fit does not equate to the number of studies measuring each individual component of  
8 supplementary fit, as some studies measured multiple components of supplementary fit in the one study.  
9

10  
11 <sup>c</sup>The total number of articles measuring P-O fit does not equate to the number of studies measuring each individual component, as some studies  
12 measured multiple components of P-O fit in the one study.  
13  
14  
15  
16  
17  
18  
19  
20  
21  
22  
23  
24  
25  
26  
27  
28  
29  
30  
31  
32  
33  
34  
35  
36  
37  
38  
39  
40  
41  
42  
43  
44  
45  
46  
47

**Table 5. Staff outcomes assessed in the studies included in this review**

| <b>Term</b>               | <b>Alternative terms</b>                                                                                                   | <b>Included articles measuring and recording this outcome<sup>a</sup></b> |
|---------------------------|----------------------------------------------------------------------------------------------------------------------------|---------------------------------------------------------------------------|
| Satisfaction              | Job satisfaction, work satisfaction, career satisfaction                                                                   | 14                                                                        |
| Intention to quit         | Turnover intent, intention to stay, job search behaviour, intent to leave job, intent to leave profession, actual turnover | 14                                                                        |
| Organisational commitment | Loyalty, organisational citizenship behaviour (OCB) <sup>b</sup> , caring behaviour                                        | 9                                                                         |
| Burnout                   | N.A.                                                                                                                       | 9                                                                         |
| Stress                    | Time pressure, job stress, psychosomatic complaints                                                                        | 4                                                                         |
| Absenteeism               | Sick leave behaviour                                                                                                       | 4                                                                         |
| Other                     | Eg, Self-rated health, accident propensity, employee attitude                                                              | 2                                                                         |

<sup>a</sup>The total of this column does not equate to the total number of included articles, as some studies measured outcomes from more than one column.

<sup>b</sup>Organisational citizenship behaviour (OCB) is defined as voluntary actions undertaken by an employee and directed towards individuals or organisations. The actions may not be rewarded, but they contribute to the work environment.[65]

Figures to be inserted into manuscript

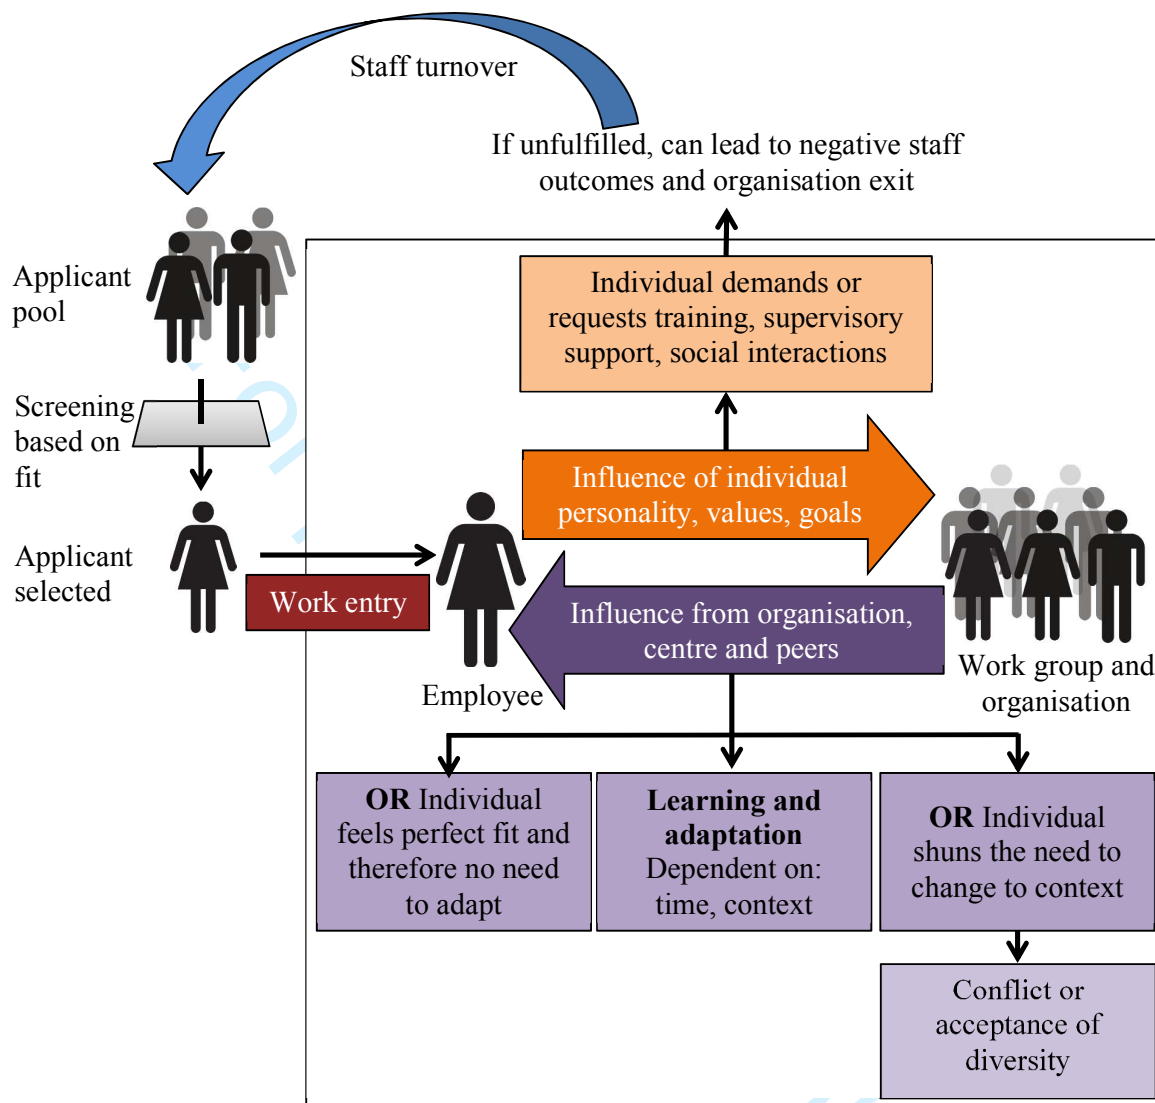

Figure 1. Rich picture modelling the process of fit and adaptation [75]

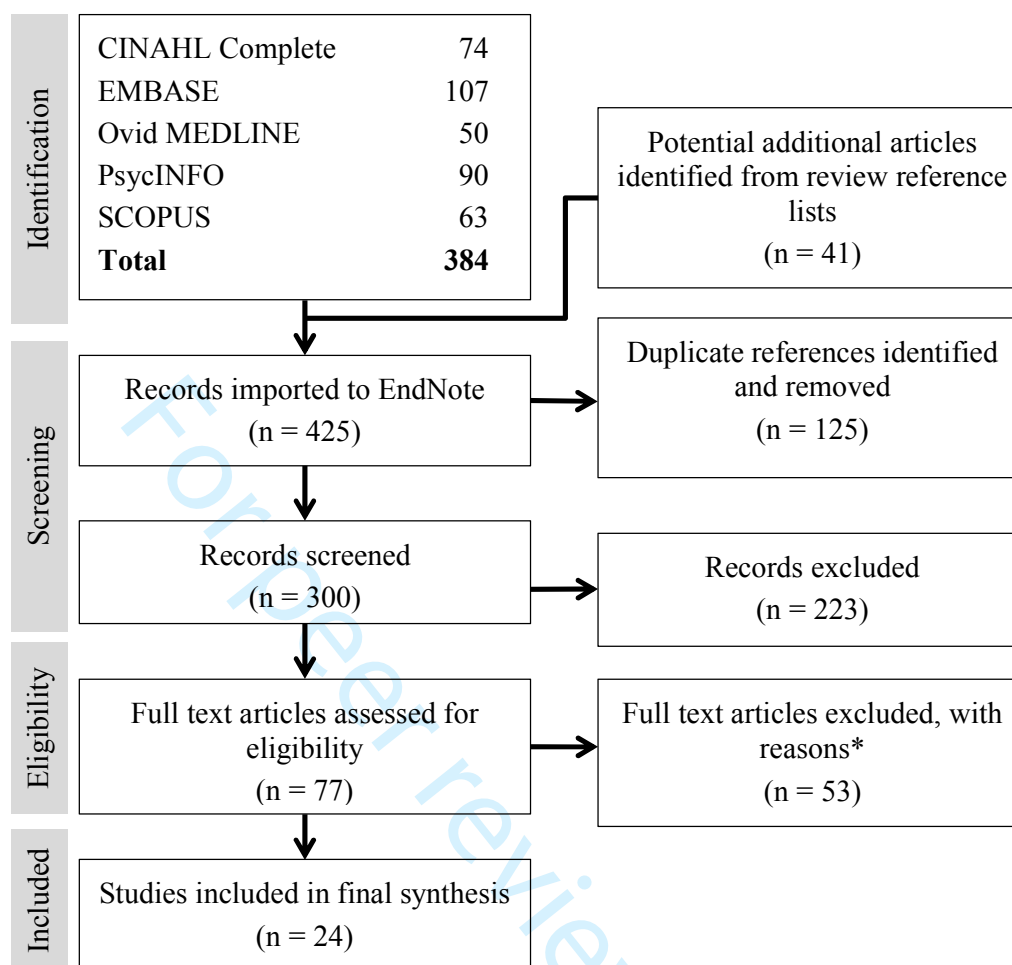

**\*Reason for exclusion of articles with full text review**

| Reason for exclusion              | Number of texts excluded for this reason <sup>a</sup> |
|-----------------------------------|-------------------------------------------------------|
| Full text not available           | 6                                                     |
| Language not in English           | 4                                                     |
| Not primary empirical study       | 4                                                     |
| Not in healthcare context         | 31                                                    |
| Not peer reviewed journal article | 5                                                     |
| Does not measure association      | 9                                                     |

**Figure 2. Search process**

<sup>a</sup>Total for “reasons for exclusion” does not add up to the total number of articles excluded, as some articles had multiple reasons for exclusion.



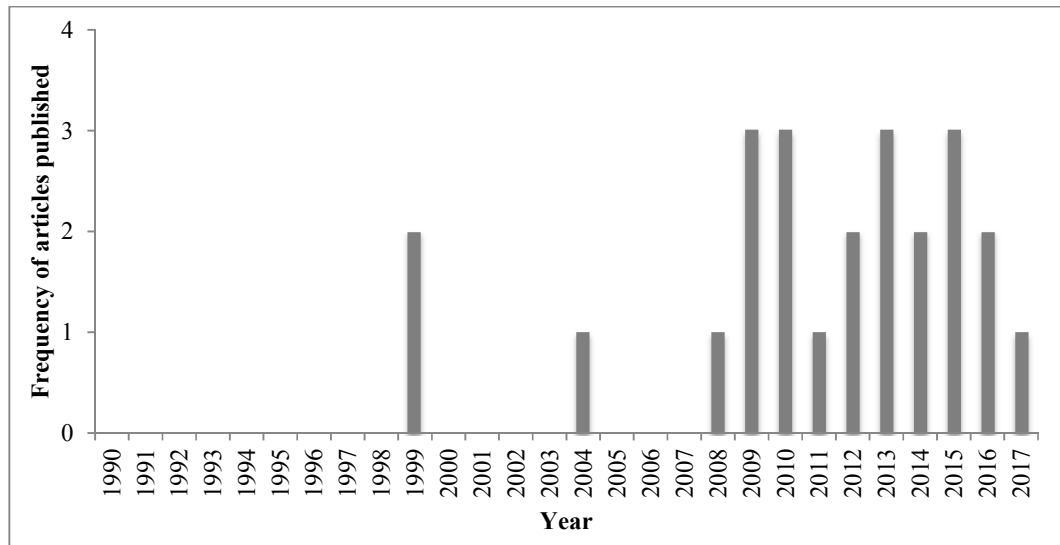

**Figure 3. Trends in the frequency of published P-O and P-G fit research conducted in a health setting over time**

Bars represent the number of peer-reviewed articles on this topic in the corresponding year (as established from inclusion in the systematic review).

1  
2  
3 **HOW PEOPLE FIT IN AT WORK: A SYSTEMATIC REVIEW OF THE**  
4 **ASSOCIATION BETWEEN PERSON-ORGANISATION AND PERSON-**  
5 **GROUP FIT WITH STAFF OUTCOMES IN HEALTHCARE**  
6  
7  
8  
9

10  
11 Supplementary File  
12  
13  
14  
15

16  
17 The following Supplementary File includes three appendices to complement the main  
18 document, with titles as follows:  
19

20 Appendix 1: Complete Search Strategy  
21

22 Appendix 2: Quality Assessment Tool Ratings of Articles Included in  
23 Systematic Review  
24

25 Appendix 3: Information About Included Articles from the Systematic Review  
26  
27  
28  
29  
30  
31  
32  
33  
34  
35  
36  
37  
38  
39  
40  
41  
42  
43  
44  
45  
46  
47  
48  
49  
50  
51  
52  
53  
54  
55  
56  
57  
58  
59  
60

## APPENDIX 1: Complete Search Strategy

Please see below for the search terms used to complete the searches for each electronic database. These are CINAHL Complete (**Table 1**), EMBASE (**Table 2**), Ovid MEDLINE (**Table 3**), PsycINFO (**Table 4**) and SCOPUS (**Table 5**).

**Table 1 CINAHL Complete search strategy**

|   |                                                                                                                                                                                                                                                                                                                                                                                                                                                                                                                                                                             |
|---|-----------------------------------------------------------------------------------------------------------------------------------------------------------------------------------------------------------------------------------------------------------------------------------------------------------------------------------------------------------------------------------------------------------------------------------------------------------------------------------------------------------------------------------------------------------------------------|
| 1 | (MH "Job Satisfaction") OR (MH "Personnel Turnover") OR (MH "Attitude of Health Personnel+") OR (MH "Personnel Retention") OR (MH "Personnel, Health Facility+") OR (MH "Burnout, Professional+")                                                                                                                                                                                                                                                                                                                                                                           |
| 2 | (Burnout OR staff outcome* OR job satisfaction OR staff satisfaction OR employee satisfaction OR employee outcome* OR retention OR staff recognition OR employee recognition OR intention to stay OR intention to leave OR debrief* OR intent to turnover OR turnover intention OR organi*ation* commitment OR stress OR work attitude OR occupational hazard* OR collegiality OR working relationship* OR teamwork OR collaboration)                                                                                                                                       |
| 3 | 1 OR 2                                                                                                                                                                                                                                                                                                                                                                                                                                                                                                                                                                      |
| 4 | (Health organi*ation* OR hospital* OR health facilit* OR acute care OR primary care OR primary health care OR health context OR health setting OR health service OR health*care OR tertiary care or nurse* or health profession* or doctor or GP or physician* or dentist* or health or health care service* or gyn*ecologist* or h*ematologist* or internist* or obstetrician* or p*ediatrician* or pharmacist* or physiotherapist* or psychiatrist* or psychologist* or radiologist* or surgeon* or surgery or therapist* or counse*lor* or neurologist* or optometrist*) |
| 5 | (person-organi*ation fit or person organi*ation fit or supplementary fit or complementary fit or needs-supplies fit or supplies-values fit or demands-abilities fit or supplementary congruence or complementary congruence or similarity fit or value congruence or goal congruence or personality congruence or person-group fit or person-team fit)                                                                                                                                                                                                                      |
| 6 | 3 AND 4 AND 5                                                                                                                                                                                                                                                                                                                                                                                                                                                                                                                                                               |

**Table 2. EMBASE search strategy**

|   |                                                                                                                                                                                                                                                                                                                                                                                                                                                                                                                                                                                                                                                                                                                                              |
|---|----------------------------------------------------------------------------------------------------------------------------------------------------------------------------------------------------------------------------------------------------------------------------------------------------------------------------------------------------------------------------------------------------------------------------------------------------------------------------------------------------------------------------------------------------------------------------------------------------------------------------------------------------------------------------------------------------------------------------------------------|
| 1 | (person-organi*ation fit or person organi*ation fit or supplementary fit or complementary fit or needs-supplies fit or supplies-values fit or demands-abilities fit or supplementary congruence or complementary congruence or similarity fit or value congruence or goal congruence or personality congruence or person-group fit or person-team fit).mp. [mp=title, abstract, heading word, drug trade name, original title, device manufacturer, drug manufacturer, device trade name, keyword, floating subheading]                                                                                                                                                                                                                      |
| 2 | (person adj3 group).ti,ab.                                                                                                                                                                                                                                                                                                                                                                                                                                                                                                                                                                                                                                                                                                                   |
| 3 | (person adj3 organi*ation).ti,ab.                                                                                                                                                                                                                                                                                                                                                                                                                                                                                                                                                                                                                                                                                                            |
| 4 | 1 OR 2 OR 3                                                                                                                                                                                                                                                                                                                                                                                                                                                                                                                                                                                                                                                                                                                                  |
| 5 | (Health organi*ation* or hospital* or health facilit* or acute care or primary care or primary health care or health context or health setting or health service or health*care or tertiary care or nurse* or health profession* or doctor or GP or physician* or dentist* or health or health care service* or gyn*ecologist* or h*ematologist* or internist* or obstetrician* or p*ediatrician* or pharmacist* or physiotherapist* or psychiatrist* or psychologist* or radiologist* or surgeon* or surgery or therapist* or counse*lor* or neurologist* or optometrist*).mp. [mp=title, abstract, heading word, drug trade name, original title, device manufacturer, drug manufacturer, device trade name, keyword, floating subheading] |
| 6 | exp health care facility/                                                                                                                                                                                                                                                                                                                                                                                                                                                                                                                                                                                                                                                                                                                    |

|    |                                                                                                                                                                                                                                                                                                                                                                                                                                                                                                                                                                                                        |
|----|--------------------------------------------------------------------------------------------------------------------------------------------------------------------------------------------------------------------------------------------------------------------------------------------------------------------------------------------------------------------------------------------------------------------------------------------------------------------------------------------------------------------------------------------------------------------------------------------------------|
| 7  | exp health care delivery/                                                                                                                                                                                                                                                                                                                                                                                                                                                                                                                                                                              |
| 8  | 5 OR 6 OR 7                                                                                                                                                                                                                                                                                                                                                                                                                                                                                                                                                                                            |
| 9  | (Burnout or staff outcome* or job satisfaction or staff satisfaction or employee satisfaction or employee outcome* or retention or staff recognition or employee recognition or intention to stay or intention to leave or debrief* or intent to turnover or turnover intention or organi*ation* commitment or stress or work attitude or occupational hazard* or collegiality or working relationship* or teamwork or collaboration).mp. [mp=title, abstract, heading word, drug trade name, original title, device manufacturer, drug manufacturer, device trade name, keyword, floating subheading] |
| 10 | Exp health personnel attitude/                                                                                                                                                                                                                                                                                                                                                                                                                                                                                                                                                                         |
| 11 | job satisfaction/                                                                                                                                                                                                                                                                                                                                                                                                                                                                                                                                                                                      |
| 12 | stress/                                                                                                                                                                                                                                                                                                                                                                                                                                                                                                                                                                                                |
| 13 | burnout/                                                                                                                                                                                                                                                                                                                                                                                                                                                                                                                                                                                               |
| 14 | 9 OR 10 OR 11 OR 12 OR 13                                                                                                                                                                                                                                                                                                                                                                                                                                                                                                                                                                              |
| 15 | 4 AND 8 AND 14                                                                                                                                                                                                                                                                                                                                                                                                                                                                                                                                                                                         |

**Table 3. Ovid MEDLINE search strategy**

|    |                                                                                                                                                                                                                                                                                                                                                                                                                                                                                                                                                                                                                                                                                                                                              |
|----|----------------------------------------------------------------------------------------------------------------------------------------------------------------------------------------------------------------------------------------------------------------------------------------------------------------------------------------------------------------------------------------------------------------------------------------------------------------------------------------------------------------------------------------------------------------------------------------------------------------------------------------------------------------------------------------------------------------------------------------------|
| 1  | (person-organi*ation fit or person organi*ation fit or supplementary fit or complementary fit or needs-supplies fit or supplies-values fit or demands-abilities fit or supplementary congruence or complementary congruence or similarity fit or value congruence or goal congruence or personality congruence or person-group fit or person-team fit).mp. [mp=title, abstract, heading word, drug trade name, original title, device manufacturer, drug manufacturer, device trade name, keyword, floating subheading]                                                                                                                                                                                                                      |
| 2  | (person adj3 group).ti,ab.                                                                                                                                                                                                                                                                                                                                                                                                                                                                                                                                                                                                                                                                                                                   |
| 3  | (person adj3 organi*ation).ti,ab.                                                                                                                                                                                                                                                                                                                                                                                                                                                                                                                                                                                                                                                                                                            |
| 4  | 1 OR 2 OR 3                                                                                                                                                                                                                                                                                                                                                                                                                                                                                                                                                                                                                                                                                                                                  |
| 5  | (Health organi*ation* or hospital* or health facilit* or acute care or primary care or primary health care or health context or health setting or health service or health*care or tertiary care or nurse* or health profession* or doctor or GP or physician* or dentist* or health or health care service* or gyn*ecologist* or h*ematologist* or internist* or obstetrician* or p*ediatrician* or pharmacist* or physiotherapist* or psychiatrist* or psychologist* or radiologist* or surgeon* or surgery or therapist* or counse*lor* or neurologist* or optometrist*).mp. [mp=title, abstract, heading word, drug trade name, original title, device manufacturer, drug manufacturer, device trade name, keyword, floating subheading] |
| 6  | “Delivery of Health Care”/                                                                                                                                                                                                                                                                                                                                                                                                                                                                                                                                                                                                                                                                                                                   |
| 7  | 5 OR 6                                                                                                                                                                                                                                                                                                                                                                                                                                                                                                                                                                                                                                                                                                                                       |
| 8  | (Burnout or staff outcome* or job satisfaction or staff satisfaction or employee satisfaction or employee outcome* or retention or staff recognition or employee recognition or intention to stay or intention to leave or debrief* or intent to turnover or turnover intention or organi*ation* commitment or stress or work attitude or occupational hazard* or collegiality or working relationship* or teamwork or collaboration).mp. [mp=title, abstract, heading word, drug trade name, original title, device manufacturer, drug manufacturer, device trade name, keyword, floating subheading]                                                                                                                                       |
| 9  | job satisfaction/                                                                                                                                                                                                                                                                                                                                                                                                                                                                                                                                                                                                                                                                                                                            |
| 10 | Stress, psychological/                                                                                                                                                                                                                                                                                                                                                                                                                                                                                                                                                                                                                                                                                                                       |
| 11 | Burnout, professional/                                                                                                                                                                                                                                                                                                                                                                                                                                                                                                                                                                                                                                                                                                                       |
| 12 | Personnel turnover/                                                                                                                                                                                                                                                                                                                                                                                                                                                                                                                                                                                                                                                                                                                          |

|    |                                |
|----|--------------------------------|
| 13 | Interprofessional relations/   |
| 14 | 8 OR 9 OR 10 OR 11 OR 12 OR 13 |
| 15 | 4 AND 7 AND 14                 |

**Table 4. PsycINFO search strategy**

|    |                                                                                                                                                                                                                                                                                                                                                                                                                                                                                                                                                                                                                                                                                                                                              |
|----|----------------------------------------------------------------------------------------------------------------------------------------------------------------------------------------------------------------------------------------------------------------------------------------------------------------------------------------------------------------------------------------------------------------------------------------------------------------------------------------------------------------------------------------------------------------------------------------------------------------------------------------------------------------------------------------------------------------------------------------------|
| 1  | (person-organi*ation fit or person organi*ation fit or supplementary fit or complementary fit or needs-supplies fit or supplies-values fit or demands-abilities fit or supplementary congruence or complementary congruence or similarity fit or value congruence or goal congruence or personality congruence or person-group fit or person-team fit).mp. [mp=title, abstract, heading word, drug trade name, original title, device manufacturer, drug manufacturer, device trade name, keyword, floating subheading]                                                                                                                                                                                                                      |
| 2  | (person adj3 group).ti,ab.                                                                                                                                                                                                                                                                                                                                                                                                                                                                                                                                                                                                                                                                                                                   |
| 3  | (person adj3 organi*ation).ti,ab.                                                                                                                                                                                                                                                                                                                                                                                                                                                                                                                                                                                                                                                                                                            |
| 4  | 1 OR 2 OR 3                                                                                                                                                                                                                                                                                                                                                                                                                                                                                                                                                                                                                                                                                                                                  |
| 5  | (Health organi*ation* or hospital* or health facilit* or acute care or primary care or primary health care or health context or health setting or health service or health*care or tertiary care or nurse* or health profession* or doctor or GP or physician* or dentist* or health or health care service* or gyn*ecologist* or h*ematologist* or internist* or obstetrician* or p*ediatrician* or pharmacist* or physiotherapist* or psychiatrist* or psychologist* or radiologist* or surgeon* or surgery or therapist* or counse*lor* or neurologist* or optometrist*).mp. [mp=title, abstract, heading word, drug trade name, original title, device manufacturer, drug manufacturer, device trade name, keyword, floating subheading] |
| 6  | Exp health care delivery/                                                                                                                                                                                                                                                                                                                                                                                                                                                                                                                                                                                                                                                                                                                    |
| 7  | 5 OR 6                                                                                                                                                                                                                                                                                                                                                                                                                                                                                                                                                                                                                                                                                                                                       |
| 8  | (Burnout or staff outcome* or job satisfaction or staff satisfaction or employee satisfaction or employee outcome* or retention or staff recognition or employee recognition or intention to stay or intention to leave or debrief* or intent to turnover or turnover intention or organi*ation* commitment or stress or work attitude or occupational hazard* or collegiality or working relationship* or teamwork or collaboration).mp. [mp=title, abstract, heading word, drug trade name, original title, device manufacturer, drug manufacturer, device trade name, keyword, floating subheading]                                                                                                                                       |
| 9  | Exp health personnel attitudes/                                                                                                                                                                                                                                                                                                                                                                                                                                                                                                                                                                                                                                                                                                              |
| 10 | Exp job satisfaction/                                                                                                                                                                                                                                                                                                                                                                                                                                                                                                                                                                                                                                                                                                                        |
| 11 | Exp occupational stress/                                                                                                                                                                                                                                                                                                                                                                                                                                                                                                                                                                                                                                                                                                                     |
| 12 | Exp employee turnover/                                                                                                                                                                                                                                                                                                                                                                                                                                                                                                                                                                                                                                                                                                                       |
| 13 | 8 OR 9 OR 10 OR 11 OR 12                                                                                                                                                                                                                                                                                                                                                                                                                                                                                                                                                                                                                                                                                                                     |
| 14 | 4 AND 7 AND 13                                                                                                                                                                                                                                                                                                                                                                                                                                                                                                                                                                                                                                                                                                                               |

**Table 5. SCOPUS search strategy**

TITLE-ABS-KEY(("person-organi\*ation fit" OR "person organi\*ation fit" OR "supplementary fit" OR "complementary fit" OR "needs-supplies fit" OR "supplies-values fit" OR "demands-abilities fit" OR "supplementary congruence" OR "complementary congruence" OR "similarity fit" OR "value congruence" OR "goal congruence" OR "personality congruence" OR "person-group fit" OR "person-team fit") AND ("Health organi\*ation\*" OR "hospital\*" OR "health facilit\*" OR "acute care" OR "primary care" OR "primary health care" OR "health context" OR "health setting" OR "health service"

1  
2  
3 OR “health\*care” OR “tertiary care” OR “nurse\*” OR “health profession\*” OR “doctor” OR “GP” OR  
4 “physician\*” OR “dentist\*” OR “health” OR “health care service\*” OR “gyn\*ecologist\*” OR  
5 “h\*ematologist\*” OR “internist\*” OR “obstetrician\*” OR “p\*ediatrician\*” OR “pharmacist\*” OR  
6 “physiotherapist\*” OR “psychiatrist\*” OR “psychologist\*” OR “radiologist\*” OR “surgeon\*” OR  
7 “surgery” OR “therapist\*” OR “counse\*lor\*” OR “neurologist\*” OR “optometrist\*”) AND (“Burnout”  
8 OR “staff outcome\*” OR “job satisfaction” OR “staff satisfaction” OR “employee satisfaction” OR  
9 “employee outcome\*” OR “retention” OR “staff recognition” OR “employee recognition” OR  
10 “intention to stay” OR “intention to leave” OR “debrief\*” OR “intent to turnover” OR “turnover  
11 intention” OR “organi\*ation\* commitment” OR “stress” OR “work attitude” OR “occupational  
12 hazard\*” OR “collegiality” OR “working relationship\*” OR “teamwork” OR “collaboration”))  
13  
14  
15  
16  
17  
18  
19  
20  
21  
22  
23  
24  
25  
26  
27  
28  
29  
30  
31  
32  
33  
34  
35  
36  
37  
38  
39  
40  
41  
42  
43  
44  
45  
46  
47  
48  
49  
50  
51  
52  
53  
54  
55  
56  
57  
58  
59  
60

1  
2  
3  
4  
5  
6  
7  
8  
9  
10  
11  
12  
13  
14  
15  
16  
17  
18  
19  
20  
21  
22  
23  
24  
25  
26  
27  
28  
29  
30  
31  
32  
33  
34  
35  
36  
37  
38  
39  
40  
41  
42  
43  
44  
45  
46  
47

**APPENDIX 2: Quality Assessment Tool Ratings of Articles Included in Systematic Review**

| Reference                                                                                              | Abstract and title | Introduction and aims | Method and data | Sampling | Data analysis | Ethics and bias | Results | Transferability/generalizability | Usefulness | Total |
|--------------------------------------------------------------------------------------------------------|--------------------|-----------------------|-----------------|----------|---------------|-----------------|---------|----------------------------------|------------|-------|
| Bao Y, Vedina R, Moodie S, and Dolan S. (2013) <i>Journal of Advanced Nursing</i> . 69(3):631-641.     | 4                  | 4                     | 4               | 4        | 4             | 4               | 4       | 4                                | 4          | 36    |
| Bellou V. (2009) <i>Employee Relations</i> . 31(5):455-470.                                            | 4                  | 4                     | 4               | 4        | 4             | 2               | 4       | 4                                | 4          | 34    |
| Boon C, and Biron M. (2016) <i>Human Relations</i> . 69(12):2177-2200.                                 | 4                  | 3                     | 4               | 4        | 4             | 2               | 3       | 4                                | 4          | 32    |
| Cha J, Chang YK, and Kim T-Y. (2014) <i>Journal of Business Ethics</i> . 123(1):57-69.                 | 4                  | 4                     | 4               | 4        | 4             | 2               | 4       | 4                                | 4          | 34    |
| Cooper-Thomas HD, and Poutasi C.(2011) <i>Asia Pacific Journal of Human Resources</i> . 49(2):180-192. | 4                  | 4                     | 4               | 4        | 4             | 4               | 4       | 3                                | 4          | 35    |
| Dotson MJ, Dave                                                                                        | 3                  | 2                     | 2               | 3        | 3             | 1               | 3       | 3                                | 3          | 23    |

| Reference                                                                                                                            | Abstract and title | Introduction and aims | Method and data | Sampling | Data analysis | Ethics and bias | Results | Transferability/generalizability | Usefulness | Total |
|--------------------------------------------------------------------------------------------------------------------------------------|--------------------|-----------------------|-----------------|----------|---------------|-----------------|---------|----------------------------------|------------|-------|
| DS, Cazier JA, and Spaulding TJ. (2014) <i>Journal of Nursing Administration</i> . 44(2):111-116.                                    |                    |                       |                 |          |               |                 |         |                                  |            |       |
| Findik M, Ögüt A, and Çağlıyan V. (2013) <i>Mediterranean Journal of Social Sciences</i> . 4(11):434-440.                            | 4                  | 2                     | 2               | 3        | 3             | 1               | 3       | 3                                | 2          | 23    |
| Gates MG, and Mark BA. (2012) <i>Research in Nursing and Health</i> . 35(3):265-276.                                                 | 3                  | 4                     | 4               | 4        | 4             | 2               | 4       | 3                                | 4          | 32    |
| Gregory ST and Menser T. (2015) <i>Journal of healthcare management / American College of Healthcare Executives</i> . 60(2):133-148. | 3                  | 3                     | 2               | 2        | 4             | 1               | 4       | 2                                | 2          | 23    |
| Hatton C, Rivers M, Mason H, et al. (1999) <i>Journal of Intellectual</i>                                                            | 4                  | 4                     | 3               | 3        | 4             | 1               | 3       | 3                                | 4          | 29    |



1  
2  
3  
4  
5  
6  
7  
8  
9  
10  
11  
12  
13  
14  
15  
16  
17  
18  
19  
20  
21  
22  
23  
24  
25  
26  
27  
28  
29  
30  
31  
32  
33  
34  
35  
36  
37  
38  
39  
40  
41  
42  
43  
44  
45  
46  
47

| Reference                                                                                                      | Abstract and title | Introduction and aims | Method and data | Sampling | Data analysis | Ethics and bias | Results | Transferability/generalizability | Usefulness | Total |
|----------------------------------------------------------------------------------------------------------------|--------------------|-----------------------|-----------------|----------|---------------|-----------------|---------|----------------------------------|------------|-------|
| <i>Disability Research.</i> 43(3):206-218.                                                                     |                    |                       |                 |          |               |                 |         |                                  |            |       |
| Kalliath TJ, Bluedorn AC, and Strube MJ. (1999) <i>Journal of Organizational Behavior.</i> 20(7):1175-1198.    | 4                  | 4                     | 3               | 4        | 4             | 4               | 3       | 4                                | 4          | 34    |
| Leiter MP, Day A, and Price L. (2015) <i>Burnout Research.</i> 2(1):25-35.                                     | 4                  | 2                     | 3               | 3        | 3             | 4               | 3       | 4                                | 4          | 30    |
| Leiter MP, Frank E, and Matheson TJ. (2009) <i>Canadian Family Physician.</i> 55(12):1224-1226.                | 3                  | 4                     | 4               | 4        | 3             | 2               | 3       | 4                                | 4          | 31    |
| Leiter MP, Gascon S, and Maru'nez-Jarreta B. (2010) <i>Journal of Applied Social Psychology.</i> 40(1): 57-75. | 3                  | 4                     | 4               | 4        | 4             | 3               | 4       | 4                                | 4          | 34    |

For peer review only

| Reference                                                                                              | Abstract and title | Introduction and aims | Method and data | Sampling | Data analysis | Ethics and bias | Results | Transferability/generalizability | Usefulness | Total |
|--------------------------------------------------------------------------------------------------------|--------------------|-----------------------|-----------------|----------|---------------|-----------------|---------|----------------------------------|------------|-------|
| Leiter MP, Jackson NJ, and Shaughnessy K. (2009) <i>Journal of Nursing Management</i> . 17(1):100-109. | 4                  | 4                     | 4               | 3        | 4             | 2               | 4       | 2                                | 4          | 31    |
| Leiter MP. (2008) <i>Giornale Italiano di Medicina del Lavoro Ed Ergonomia</i> . 30(1 Suppl A):A52-58. | 4                  | 3                     | 3               | 4        | 3             | 2               | 1       | 3                                | 3          | 26    |
| Rehfuss MC, Gambrell CE, and Meyer D. (2012) <i>The Career Development Quarterly</i> . 60(2):145-151.  | 4                  | 4                     | 4               | 3        | 4             | 4               | 4       | 3                                | 4          | 34    |
| Ren T, and Hamann DJ. (2015) <i>Personnel Review</i> . 44(4):550-566.                                  | 3                  | 4                     | 4               | 3        | 4             | 3               | 4       | 4                                | 4          | 33    |
| Ren T. (2013) <i>Journal of Business Ethics</i> . 112(2):213-224.                                      | 4                  | 4                     | 4               | 3        | 4             | 2               | 3       | 3                                | 4          | 31    |
| Risman KL, Erickson RJ, and                                                                            | 4                  | 4                     | 4               | 3        | 4             | 1               | 3       | 3                                | 4          | 30    |

1  
2  
3  
4  
5  
6  
7  
8  
9  
10  
11  
12  
13  
14  
15  
16  
17  
18  
19  
20  
21  
22  
23  
24  
25  
26  
27  
28  
29  
30  
31  
32  
33  
34  
35  
36  
37  
38  
39  
40  
41  
42  
43  
44  
45  
46  
47

| Reference                                                                                       | Abstract and title | Introduction and aims | Method and data | Sampling | Data analysis | Ethics and bias | Results | Transferability/generalizability | Usefulness | Total |
|-------------------------------------------------------------------------------------------------|--------------------|-----------------------|-----------------|----------|---------------|-----------------|---------|----------------------------------|------------|-------|
| Diefendorff JM. (2016) <i>Applied Nursing Research</i> . 31:121-125.                            |                    |                       |                 |          |               |                 |         |                                  |            |       |
| Schmidt KH. (2010) <i>International Journal of Nursing Studies</i> . 47(7):855-863.             | 4                  | 4                     | 4               | 3        | 3             | 2               | 4       | 4                                | 4          | 32    |
| Somers MJ. (2010) <i>Journal of Occupational and Organizational Psychology</i> . 83(2):443-453. | 3                  | 4                     | 4               | 3        | 4             | 1               | 4       | 3                                | 4          | 30    |
| Verplanken B. (2004) <i>International Journal of Nursing Studies</i> . 41(6):599-605.           | 4                  | 4                     | 4               | 4        | 4             | 1               | 4       | 3                                | 3          | 31    |
| Zhang M, Yan F, Wang W, and Li G. (2017) <i>BMJ Open</i> . 7(2).                                | 4                  | 4                     | 4               | 3        | 4             | 4               | 4       | 4                                | 4          | 35    |

For peer review only

### APPENDIX 3. Information About Included Articles from the Systematic Review

| Reference                                                                                          | Study objectives/hypotheses/<br>research questions related to<br>systematic review                                                                                                                                                                                                                                                  | Study design                  | Context; type of<br>participants;<br>number of<br>participants         | PO/PG fit?*; type of<br>fit studied; findings<br>direction; staff<br>outcome                                       | Key findings                                                                                                                                                                                                                                                                                                                                                                                                                                                                                              |
|----------------------------------------------------------------------------------------------------|-------------------------------------------------------------------------------------------------------------------------------------------------------------------------------------------------------------------------------------------------------------------------------------------------------------------------------------|-------------------------------|------------------------------------------------------------------------|--------------------------------------------------------------------------------------------------------------------|-----------------------------------------------------------------------------------------------------------------------------------------------------------------------------------------------------------------------------------------------------------------------------------------------------------------------------------------------------------------------------------------------------------------------------------------------------------------------------------------------------------|
| Bao Y, Vedina R, Moodie S, and Dolan S. (2013) <i>Journal of Advanced Nursing</i> . 69(3):631-641. | Value incongruence will be positively related to burnout, turnover intention and accident propensity, and negatively related to self-rated health. Moreover, it was hypothesised that burnout mediates the relationship between value incongruence and self-rated health/turnover intention/accident propensity. (see p. 633-634)   | Quantitative; cross-sectional | Large university hospital; nurses; 234                                 | PO; value congruence; self-rated health, turnover intention, accident propensity, burnout; partly positive         | “Of the three value axes, Economical and Ethical value incongruence are correlated with burnout. This suggests that hypothesis H1 is supported on these two axes. Moreover, Emotional and Ethical value incongruence were correlated with accident propensity. Thus, hypothesis H4a was supported on these two axes. All three types of value incongruence were correlated with turnover intention (hypothesis H3a fully confirmed), but none of them was related to health (H2a rejected).” (p. 635-636) |
| Bellou V. (2009) <i>Employee Relations</i> . 31(5):455-470.                                        | “This study is an attempt to explore the effect that value congruence between employees and public organizations has on exit, voice, loyalty, and neglect (EVLN) displayed by the former ... This study expects to reveal the mediating role of job satisfaction in the relationship between P-O fit and these responses.” (p. 456) | Quantitative; cross-sectional | Three public hospitals; medical, nursing and administration staff; 125 | PO; supplementary value congruence; exit, voice, loyalty and neglect (EVLN), and job satisfaction; partly positive | “The greater the P-O fit, the higher the job satisfaction and the loyalty. On the contrary, the relationship between P-O fit and neglect is negative whereas between P-O fit and exit and voice is non-significant.” (p. 463, statistics excluded from quote)                                                                                                                                                                                                                                             |
| Boon C, and Biron M. (2016) <i>Human Relations</i> . 69(12):2177-                                  | “We examine the role of leader-member exchange in the relationship between two types of person-environment fit over                                                                                                                                                                                                                 | Quantitative; longitudinal    | Elderly care organisation; nurses, therapists, physicians and          | PO; supplementary value congruence; turnover; nil                                                                  | PO fit was significantly correlated with needs-supplies and demands-abilities fit, but were not significantly correlated with actual turnover (p. 2188)                                                                                                                                                                                                                                                                                                                                                   |

1  
2  
3  
4  
5  
6  
7  
8  
9  
10  
11  
12  
13  
14  
15  
16  
17  
18  
19  
20  
21  
22  
23  
24  
25  
26  
27  
28  
29  
30  
31  
32  
33  
34  
35  
36  
37  
38  
39  
40  
41  
42  
43  
44  
45  
46  
47

|                                                                                                        |                                                                                                                                                                                                                                                                                                                                                                                                                                               |                               |                                                                                                                                                                                                                 |                                                                                                                                                                                              |                                                                                                                                                                                                                                                                                          |
|--------------------------------------------------------------------------------------------------------|-----------------------------------------------------------------------------------------------------------------------------------------------------------------------------------------------------------------------------------------------------------------------------------------------------------------------------------------------------------------------------------------------------------------------------------------------|-------------------------------|-----------------------------------------------------------------------------------------------------------------------------------------------------------------------------------------------------------------|----------------------------------------------------------------------------------------------------------------------------------------------------------------------------------------------|------------------------------------------------------------------------------------------------------------------------------------------------------------------------------------------------------------------------------------------------------------------------------------------|
| 2200.                                                                                                  | time: person–organization and person–job fit, and subsequent turnover” (p. 2177)                                                                                                                                                                                                                                                                                                                                                              |                               | support staff; 160                                                                                                                                                                                              |                                                                                                                                                                                              |                                                                                                                                                                                                                                                                                          |
| Cha J, Chang YK, and Kim T-Y. (2014) <i>Journal of Business Ethics</i> . 123(1):57-69.                 | “Hypothesis 3a Organizational citizenship and caring behavior will decrease as personal prosocial identity increases toward organizational prosocial identity and will increase as personal prosocial identity exceeds organizational prosocial identity.<br>Hypothesis 3b Organizational citizenship and caring behavior will be higher when personal and organizational prosocial identities are both high than when both are low.” (p. 61) | Quantitative; cross-sectional | 104 hospitals; doctors, nurses, administrative staff; 589                                                                                                                                                       | PO; supplementary personality and value congruence; organizational citizenship behaviour (OCB), caring behaviour; positive                                                                   | “Hypothesis 3a was supported only for OCBI and caring behavior ... Hypothesis 3b was supported” (p. 64-65) OBCI=OBC towards individuals (rather than organisations)                                                                                                                      |
| Cooper-Thomas HD, and Poutasi C.(2011) <i>Asia Pacific Journal of Human Resources</i> . 49(2):180-192. | “Research question 1: Is PJ fit or PO fit the more important predictor of (a) job satisfaction and (b) organizational commitment?<br>Research question 2: Which mediated path is the strongest predictor of intent to quit?” (p. 183)                                                                                                                                                                                                         | Quantitative; cross-sectional | Different contexts; Pacific health care workers with various roles, eg, nursing, administration, management (heritage from a Pacific Island, have higher rates of chronic illness than other ethnic groups); 99 | PO; complementary and supplementary (but it is unspecified which component of supplementary fit is being examined); job satisfaction, organisational commitment, intention to quit; positive | PO fit was significantly positively correlated with job satisfaction and organisational commitment, and significantly negatively correlated with intention to quit. Job satisfaction and organizational commitment themselves also have significant direct effects on intention to quit. |
| Dotson MJ, Dave DS, Cazier JA, and Spaulding TJ. (2014) <i>Journal of</i>                              | Measured the effect of value congruence on intention to leave the job and the nursing profession, and job satisfaction                                                                                                                                                                                                                                                                                                                        | Quantitative; cross-sectional | Various nursing contexts, eg, hospital, administration,                                                                                                                                                         | PO, PG; supplementary value congruence; intention to leave job, intention                                                                                                                    | As expected, value congruence was significantly positively associated with job satisfaction, and negatively associated with intention to leave the job. However                                                                                                                          |

|                                                                                                                                            |                                                                                                                                                                                                                                             |                                      |                                                                                                                                                                             |                                                                                                                                                                                         |                                                                                                                                                                                                                                                                                                              |
|--------------------------------------------------------------------------------------------------------------------------------------------|---------------------------------------------------------------------------------------------------------------------------------------------------------------------------------------------------------------------------------------------|--------------------------------------|-----------------------------------------------------------------------------------------------------------------------------------------------------------------------------|-----------------------------------------------------------------------------------------------------------------------------------------------------------------------------------------|--------------------------------------------------------------------------------------------------------------------------------------------------------------------------------------------------------------------------------------------------------------------------------------------------------------|
| <p><i>Nursing Administration.</i><br/>44(2):111-116.</p>                                                                                   |                                                                                                                                                                                                                                             |                                      | <p>doctors office, school. In rural and urban environments; nurses; 861</p>                                                                                                 | <p>to leave profession, job satisfaction; partly positive</p>                                                                                                                           | <p>unexpectedly it was also significantly <i>positively</i> associated with intention to leave the nursing profession</p>                                                                                                                                                                                    |
| <p>Findik M, Ögüt A, and Çağlıyan V. (2013) <i>Mediterranean Journal of Social Sciences.</i> 4(11):434-440.</p>                            | <p>“To study the relationships between the level of person-organization fit, the level of job satisfaction, and the levels of turnover intentions.” (p. 436)</p>                                                                            | <p>Quantitative; cross-sectional</p> | <p>Doctors and professors working in internal medicine, surgical or basic medicine areas; health personnel; 128</p>                                                         | <p>PO, PG; PO: supplementary value congruence, knowledge, skills and abilities (KSAs), personality. PG: supplementary value congruence; job satisfaction, turnover intent; positive</p> | <p>The study reported a statistically significant relationship between PO fit and both job satisfaction and turnover intent</p>                                                                                                                                                                              |
| <p>Gates MG, and Mark BA. (2012) <i>Research in Nursing and Health.</i> 35(3):265-276.</p>                                                 | <p>“The greater the diversity based on values, the more negative the outcomes.” (p. 267)</p>                                                                                                                                                | <p>Quantitative; longitudinal</p>    | <p>Participants included in the final study worked in 239 units from 133 hospitals; nurses; 1,450</p>                                                                       | <p>PG; supplementary value congruence; job satisfaction, intent to stay; positive</p>                                                                                                   | <p>“The less similar nurses perceived themselves to be relative to others in their unit in terms of values (eg, greater perceived value diversity), the less likely they were to be satisfied with their jobs and the less likely they were to report intent to stay in their current position” (p. 272)</p> |
| <p>Gregory ST and Menser T. (2015) <i>Journal of healthcare management / American College of Healthcare Executives.</i> 60(2):133-148.</p> | <p>“This study is an opportunity to develop and test the theory for burnout in the primary care setting; specifically, it will determine the applicability of the AWS model in measuring burnout for primary care physicians.” (p. 137)</p> | <p>Quantitative; longitudinal</p>    | <p>Ambulatory units: primary care physicians; 153 (97 at baseline, 91 at the 3-month follow-up, and 56 at the final 6-month follow-up) representing 244 total responses</p> | <p>PO; supplementary value congruence; burnout; positive</p>                                                                                                                            | <p>It was reported that values were significantly associated with all three aspects of burnout (emotional exhaustion, depersonalization, and self-efficacy, which is defined as the level of personal accomplishment one feels with respect to their work).<sup>2,13,14</sup></p>                            |

|                                                                                                             |                                                                                                                |                                                                                                                                                                                                                                                                                                                                                                                         |                               |                                                                                                                                                                                                                 |                                                                                                                        |                                                                                                                                                                                                                                                                                                                                                                                                                                                                                                                                                                                                                                                                                                                            |
|-------------------------------------------------------------------------------------------------------------|----------------------------------------------------------------------------------------------------------------|-----------------------------------------------------------------------------------------------------------------------------------------------------------------------------------------------------------------------------------------------------------------------------------------------------------------------------------------------------------------------------------------|-------------------------------|-----------------------------------------------------------------------------------------------------------------------------------------------------------------------------------------------------------------|------------------------------------------------------------------------------------------------------------------------|----------------------------------------------------------------------------------------------------------------------------------------------------------------------------------------------------------------------------------------------------------------------------------------------------------------------------------------------------------------------------------------------------------------------------------------------------------------------------------------------------------------------------------------------------------------------------------------------------------------------------------------------------------------------------------------------------------------------------|
| 1<br>2<br>3<br>4<br>5<br>6<br>7<br>8<br>9<br>10<br>11<br>12<br>13<br>14<br>15<br>16<br>17<br>18<br>19<br>20 | Hatton C, Rivers M, Mason H, et al. (1999) <i>Journal of Intellectual Disability Research</i> . 43(3):206-218. | “To investigate relationships between person= organization ‘fit’ and staff outcomes. If the theory is correct, greater person=organization ‘fit’ should be associated with better staff outcomes across a range of indices.” (p. 43)                                                                                                                                                    | Quantitative; cross-sectional | UK services for people with intellectual disabilities (village, community residential, education and community teams); staff at all levels, eg, administrative, domestic, managerial and therapeutic staff; 450 | PO; NA; job stress, job search behaviour, intention to leave, sick leave behaviour, work satisfaction; partly positive | “Higher levels of general stress were strongly associated with poorer person-organization fit on the organization culture dimension of tolerant/ staff-oriented. Greater job strain was strongly associated with poorer person-organization fit on four dimensions ... Intention to leave was strongly associated with poorer person-organization fit on four organizational culture dimensions ... Actual job search behaviour and sick leave in the previous 6 months were not strongly associated with any dimension of organizational culture. Finally, higher levels of work satisfaction were very strongly associated with better person-organization fit on all nine dimensions of organizational culture” (p. 43) |
| 21<br>22<br>23<br>24<br>25<br>26<br>27<br>28<br>29<br>30<br>31<br>32                                        | Kalliath TJ, Bluedorn AC, and Strube MJ. (1999) <i>Journal of Organizational Behavior</i> . 20(7):1175-1198.   | “The greater the congruence between individuals' (a) internal process (b) open systems (c) human relations, and (d) rational goal values and their perceptions of (a) internal process (b) open systems (c) human relations, and (d) rational goal values in the organization, respectively, the higher their levels of organizational commitment ... [and] job satisfaction” (p. 1181) | Quantitative; cross-sectional | Two hospitals; executives, middle managers, first-line supervisors, employees, resident physicians, contract workers; 1358                                                                                      | PO; value congruence; job satisfaction, organisational commitment; positive                                            | There were significant positive intercorrelations between value congruence on the one hand, and job satisfaction and organisational commitment on the other. Moreover, “These results indicate weak support for the four congruence hypotheses predicting organizational commitment ... [and] predicting job satisfaction” (p. 1189)                                                                                                                                                                                                                                                                                                                                                                                       |
| 33<br>34<br>35<br>36<br>37<br>38<br>39<br>40<br>41<br>42<br>43<br>44<br>45<br>46<br>47                      | Leiter MP, Day A, and Price L. (2015) <i>Burnout Research</i> . 2(1):25-35.                                    | “To examine the contribution of attachment dimensions to predicting burnout beyond measures of workload, value congruence, and coworker incivility” (p. 31-32)                                                                                                                                                                                                                          | Quantitative; cross-sectional | Hospital; managers and front-line staff from many professions; 1624                                                                                                                                             | PO; supplementary value congruence; burnout; positive                                                                  | “The contribution of attachment styles to a model of burnout based on workload and value congruence emphasizes the importance of considering employees’ understanding of their social context” (p.34) ... value congruence was significantly associated with all other variables                                                                                                                                                                                                                                                                                                                                                                                                                                           |

|                                                                                                                 |                                                                                                                                                                                                                                                                                                                               |                               |                                                                                |                                                                        |                                                                                                                                                                                                                                                                                                                                                                                                                                                                                                                                                                                                                                                                                                                                                              |
|-----------------------------------------------------------------------------------------------------------------|-------------------------------------------------------------------------------------------------------------------------------------------------------------------------------------------------------------------------------------------------------------------------------------------------------------------------------|-------------------------------|--------------------------------------------------------------------------------|------------------------------------------------------------------------|--------------------------------------------------------------------------------------------------------------------------------------------------------------------------------------------------------------------------------------------------------------------------------------------------------------------------------------------------------------------------------------------------------------------------------------------------------------------------------------------------------------------------------------------------------------------------------------------------------------------------------------------------------------------------------------------------------------------------------------------------------------|
| Leiter MP, Frank E, and Matheson TJ. (2009) <i>Canadian Family Physician</i> . 55(12):1224-1226.                | “Values and manageable workload would interact differently for women and men when predicting burnout.” (p. 1225.e1)                                                                                                                                                                                                           | Quantitative; cross-sectional | NA (online survey); physicians; 2536                                           | PO; supplementary value congruence; burnout; positive                  | “Values congruence predicted exhaustion and cynicism for men and women (P = .001)” (p. 1225e2) ... “The results also confirmed that workload and values congruence interact differently for women and men.” (p. 1225e4)                                                                                                                                                                                                                                                                                                                                                                                                                                                                                                                                      |
| Leiter MP, Gascon S, and Maru'nez-Jarreta B. (2010) <i>Journal of Applied Social Psychology</i> . 40(1): 57-75. | “The study evaluates a structural equation model in which the three aspects of burnout— exhaustion, cynicism, and efficacy—mediate the relationship of the work environment with employees’ evaluation of organizational change” (p. 57)                                                                                      | Quantitative; cross-sectional | Three hospitals in northern and Eastern Spain; nurses and physicians; 874; 603 | PO; value congruence; burnout; positive                                | There was a significant negative correlation for both doctors and nurses value congruence with exhaustion and cynicism (components of burnout), and a significantly positive correlation with efficacy. (p. 66) ... “Second, value congruence was significantly related to all three aspects of relationships with work. The path from values to cynicism was relatively small in the modified model, indicating that most of that relationship was mediated through exhaustion in light of the large zero-order correlation between the two constructs. They are clearly related, but much of that relationship is associated with the energetic process captured by exhaustion. Together, the analysis supports the core constructs of the model.” (p. 70) |
| Leiter MP, Jackson NJ, and Shaughnessy K. (2009) <i>Journal of Nursing Management</i> . 17(1):100-109.          | Authors expected there would be “a more powerful relationship of work values with generation than with organizational tenure. This contrast is central to the study’s focus on generation as a value position: the important point is not simply a nurses’ age or job tenure, but the inherent generational values.” (p. 103) | Quantitative; cross-sectional | Acute care facilities; nurses; 667                                             | PO; supplementary value congruence; burnout, turnover intent; positive | “The analysis identified a greater person/organization value mismatch for Generation X nurses than for Baby Boomer nurses. Their greater value mismatch was associated with a greater susceptibility to burnout and a stronger intention to quit for Generation X nurses.” (p. 100)                                                                                                                                                                                                                                                                                                                                                                                                                                                                          |



1  
2  
3  
4  
5  
6  
7  
8  
9  
10  
11  
12  
13  
14  
15  
16  
17  
18  
19  
20  
21  
22  
23  
24  
25  
26  
27  
28  
29  
30  
31  
32  
33  
34  
35  
36  
37  
38  
39  
40  
41  
42  
43  
44  
45  
46  
47

|                                                                                                              |                                                                                                                                                                                                                                                                                                                              |                                      |                                                                                                                                       |                                                                                                                  |                                                                                                                                                                                                                                                                                                                                                                                                                                                                                                                                          |
|--------------------------------------------------------------------------------------------------------------|------------------------------------------------------------------------------------------------------------------------------------------------------------------------------------------------------------------------------------------------------------------------------------------------------------------------------|--------------------------------------|---------------------------------------------------------------------------------------------------------------------------------------|------------------------------------------------------------------------------------------------------------------|------------------------------------------------------------------------------------------------------------------------------------------------------------------------------------------------------------------------------------------------------------------------------------------------------------------------------------------------------------------------------------------------------------------------------------------------------------------------------------------------------------------------------------------|
| <p>Leiter MP. (2008) <i>Giornale Italiano di Medicina del Lavoro Ed Ergonomia</i>. 30(1 Suppl A):A52-58.</p> | <p>To test “the extent to which value congruence enhances the prediction of burnout beyond the prediction provided by demands and resources.” (p. A52)</p>                                                                                                                                                                   | <p>Quantitative; cross-sectional</p> | <p>Tertiary hospitals, regional hospitals, community hospitals and other settings; nurses; 725</p>                                    | <p>PO; value congruence; burnout; positive</p>                                                                   | <p>There was a significant correlation between value congruence and each dimension of burnout ... For further analysis, “Only two correlated error terms were freed in the analysis: MBI-3 with MBI-4 and Control-1 with Control-2.” (p. A56) So values were not analysed in results.</p>                                                                                                                                                                                                                                                |
| <p>Rehfluss MC, Gambrell CE, and Meyer D. (2012) <i>The Career Development Quarterly</i>. 60(2):145-151.</p> | <p>“We hypothesized that each type of fit would be positively related to counselor career satisfaction.” (p. 146)</p>                                                                                                                                                                                                        | <p>Quantitative; cross-sectional</p> | <p>Various counselling and counselling education contexts; counsellors; 437</p>                                                       | <p>PO; supplementary value congruence; career satisfaction; positive</p>                                         | <p>“P-O and N-S fit were both positively related to career satisfaction, and no relationship was found between career satisfaction and D-A fit.” (p. 149) Please note, N-S and D-A fit were measured for person-job fit, and are not considered further for this systematic review</p>                                                                                                                                                                                                                                                   |
| <p>Ren T, and Hamann DJ. (2015) <i>Personnel Review</i>. 44(4):550-566.</p>                                  | <p>Examine how employee-organisation value congruence was related to the staff outcomes of satisfaction, turnover intent and organisational commitment at different levels of nursing.</p>                                                                                                                                   | <p>Quantitative; cross-sectional</p> | <p>Nursing homes; nurses; 562</p>                                                                                                     | <p>PO; supplementary value congruence; satisfaction, turnover intent and organisational commitment; positive</p> | <p>“Value congruence is found positively associated with nurses’ job satisfaction and organizational commitment, but negatively with turnover intention.” (p. 550)</p>                                                                                                                                                                                                                                                                                                                                                                   |
| <p>Ren T. (2013) <i>Journal of Business Ethics</i>. 112(2):213-224.</p>                                      | <p>“Organizational ownership moderates the relationship between employee–organization value congruence and employees’ (a) job satisfaction, (b) organizational commitment, and (c) intent to quit in a way that the effect is stronger among for-profit employees in comparison to the nonprofit counterparts.” (p. 215)</p> | <p>Quantitative; cross-sectional</p> | <p>23 non-profit and 7 for-profit nursing homes; registered nurses, licenced practicing nurses, certified nursing assistants; 407</p> | <p>PO; value congruence; Job satisfaction, Organisational commitment, intention to quit; positive</p>            | <p>“Employees’ value congruence has a positive relationship with employees’ self-rating on job satisfaction (p &lt; 0.01, two-tailed test), organizational commitment (p &lt; 0.01, two-tailed test), and a negative relationship with intent to quit (p &lt; 0.01, two-tailed test) ... in general, value congruence improves the three aspects of job attitudes across different ownership types of organization, and among two out of the three cases the effect appears to be stronger in for-profit organizations” (p. 221-222)</p> |

|                                                                            |                                                                                                                      |                                                                                                                                                                                                                                                                                                                                                                                     |                                  |                                                                                         |                                                                                                                                               |                                                                                                                                                                                                                                                                                                                                                                                                                                                                                                                                                                                                                                 |
|----------------------------------------------------------------------------|----------------------------------------------------------------------------------------------------------------------|-------------------------------------------------------------------------------------------------------------------------------------------------------------------------------------------------------------------------------------------------------------------------------------------------------------------------------------------------------------------------------------|----------------------------------|-----------------------------------------------------------------------------------------|-----------------------------------------------------------------------------------------------------------------------------------------------|---------------------------------------------------------------------------------------------------------------------------------------------------------------------------------------------------------------------------------------------------------------------------------------------------------------------------------------------------------------------------------------------------------------------------------------------------------------------------------------------------------------------------------------------------------------------------------------------------------------------------------|
| 1<br>2<br>3<br>4<br>5<br>6<br>7<br>8<br>9<br>10<br>11<br>12<br>13          | Risman KL,<br>Erickson RJ, and<br>Diefendorff JM.<br>(2016) <i>Applied<br/>Nursing<br/>Research</i> .<br>31:121-125. | “This study investigates the<br>relationship of perceived value<br>congruence with ... job<br>satisfaction ... [it is<br>hypothesised that] value<br>congruence will be positively<br>related to nurses’ job<br>satisfaction.” (p. 122)                                                                                                                                             | Quantitative;<br>cross-sectional | Hospital; nurses;<br>753                                                                | PO; supplementary<br>value congruence<br>(although one item<br>unintentionally<br>measures goal<br>congruence); job<br>satisfaction; positive | Perceived value congruence was significantly<br>correlated with job satisfaction                                                                                                                                                                                                                                                                                                                                                                                                                                                                                                                                                |
| 14<br>15<br>16<br>17<br>18<br>19<br>20<br>21<br>22                         | Schmidt KH.<br>(2010)<br><i>International<br/>Journal of<br/>Nursing Studies</i> .<br>47(7):855-863.                 | “Goal incongruence is expected<br>to be positively related to<br>indicators of job strain.” (p.<br>857)                                                                                                                                                                                                                                                                             | Quantitative;<br>longitudinal    | Six nursing homes;<br>employees in the<br>nursing homes; 242                            | PO; goal congruence;<br>burnout,<br>psychosomatic<br>complaints,<br>absenteeism; positive                                                     | Goal incongruence was significantly correlated<br>with all outcome variables ... “the results show<br>that the perceived mismatch between personal<br>and organizational goals is positively related to<br>a broad spectrum of indicators of strain that<br>includes both self-report measures (exhaustion,<br>depersonalization, psychosomatic complaints)<br>and measures of absenteeism covering a period<br>of 12 months after the administration of<br>questionnaires.” (p. 860)                                                                                                                                           |
| 23<br>24<br>25<br>26<br>27<br>28<br>29<br>30<br>31<br>32<br>33<br>34<br>35 | Somers MJ.<br>(2010) <i>Journal of<br/>Occupational and<br/>Organizational<br/>Psychology</i> .<br>83(2):443-453.    | “The level of person–<br>organization value congruence<br>for highly committed<br>employees, those with an AC–<br>NC dominant profile, and those<br>with an AC dominant profile is<br>significantly greater than is the<br>level of person–organization<br>value congruence for the other<br>commitment profiles.” (p. 447).<br>AC=affective commitment;<br>NC=normative commitment | Quantitative;<br>longitudinal    | Hospital in an<br>urban area;<br>employees directly<br>involved in patient<br>care; 572 | PO; supplementary<br>value congruence;<br>organisational<br>commitment,<br>turnover intent,<br>turnover,<br>absenteeism; partly<br>positive   | Value congruence was significantly correlated<br>with affective and normative commitment,<br>turnover intention and turnover, but not<br>absenteeism. The P-O fit hypothesis was<br>supported such that “the AC–NC dominant<br>profile had the highest levels of person-<br>organization value- congruence followed by<br>highly committed employees and those with an<br>AC dominant profile. Although, the ordering of<br>the means was as expected, it should be noted<br>that the difference between highly committed<br>employees and those with an AC dominant<br>profile was not statistically significant.” (p.<br>450) |

1  
2  
3  
4  
5  
6  
7  
8  
9  
10  
11  
12  
13  
14  
15  
16  
17  
18  
19  
20  
21  
22  
23  
24  
25  
26  
27  
28  
29  
30  
31  
32  
33  
34  
35  
36  
37  
38  
39  
40  
41  
42  
43  
44  
45  
46  
47

|                                                                                       |                                                                                                                                         |                               |                                                          |                                                                                    |                                                                                                                                                                                                                                                                                                                                                                                                                 |
|---------------------------------------------------------------------------------------|-----------------------------------------------------------------------------------------------------------------------------------------|-------------------------------|----------------------------------------------------------|------------------------------------------------------------------------------------|-----------------------------------------------------------------------------------------------------------------------------------------------------------------------------------------------------------------------------------------------------------------------------------------------------------------------------------------------------------------------------------------------------------------|
| Verplanken B. (2004) <i>International Journal of Nursing Studies</i> . 41(6):599-605. | “The present study addressed the question how value congruence relates to job satisfaction” (p. 600)                                    | Quantitative; cross-sectional | Hospital surgery ward; nurses; 56                        | PG; value congruence; job satisfaction, employee attitude, time pressure; positive | “It was expected that job satisfaction would be predicted by ward attitudes. The correlation between these two variables was indeed the largest, but human relations and rational goal value congruence were also significantly correlated with job satisfaction.” (p. 602) ... human relations value congruence was significantly correlated with ward attitude (p<.001) and job satisfaction (p<.05) (p. 603) |
| Zhang M, Yan F, Wang W, and Li G. (2017) <i>BMJ Open</i> . 7(2).                      | “This study aims to examine the mediation effect of job satisfaction on the relationship between P-O fit and turnover intention” (p. 1) | Quantitative; cross-sectional | Community health facility; community health workers; 656 | PO; needs-supplies; turnover intent, job satisfaction; positive                    | PO fit was significantly positively associated with job satisfaction, and inversely correlated with turnover intent.                                                                                                                                                                                                                                                                                            |

\*Included studies may have also measured other types of P-E fit eg, P-J or P-V fit, but this was not reported in this table as it is unrelated to the aims of the systematic review.

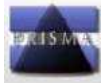

# PRISMA 2009 Checklist

| Section/topic                      | #  | Checklist item                                                                                                                                                                                                                                                                                              | Reported on page # |
|------------------------------------|----|-------------------------------------------------------------------------------------------------------------------------------------------------------------------------------------------------------------------------------------------------------------------------------------------------------------|--------------------|
| <b>TITLE</b>                       |    |                                                                                                                                                                                                                                                                                                             |                    |
| Title                              | 1  | Identify the report as a systematic review, meta-analysis, or both.                                                                                                                                                                                                                                         | 1                  |
| <b>ABSTRACT</b>                    |    |                                                                                                                                                                                                                                                                                                             |                    |
| Structured summary                 | 2  | Provide a structured summary including, as applicable: background; objectives; data sources; study eligibility criteria, participants, and interventions; study appraisal and synthesis methods; results; limitations; conclusions and implications of key findings; systematic review registration number. | 2-6                |
| <b>INTRODUCTION</b>                |    |                                                                                                                                                                                                                                                                                                             |                    |
| Rationale                          | 3  | Describe the rationale for the review in the context of what is already known.                                                                                                                                                                                                                              | 4-6                |
| Objectives                         | 4  | Provide an explicit statement of questions being addressed with reference to participants, interventions, comparisons, outcomes, and study design (PICOS).                                                                                                                                                  | 5-7                |
| <b>METHODS</b>                     |    |                                                                                                                                                                                                                                                                                                             |                    |
| Protocol and registration          | 5  | Indicate if a review protocol exists, if and where it can be accessed (e.g., Web address), and, if available, provide registration information including registration number.                                                                                                                               | n.a.               |
| Eligibility criteria               | 6  | Specify study characteristics (e.g., PICOS, length of follow-up) and report characteristics (e.g., years considered, language, publication status) used as criteria for eligibility, giving rationale.                                                                                                      | 6-8                |
| Information sources                | 7  | Describe all information sources (e.g., databases with dates of coverage, contact with study authors to identify additional studies) in the search and date last searched.                                                                                                                                  | 6-8                |
| Search                             | 8  | Present full electronic search strategy for at least one database, including any limits used, such that it could be repeated.                                                                                                                                                                               | 6-8                |
| Study selection                    | 9  | State the process for selecting studies (i.e., screening, eligibility, included in systematic review, and, if applicable, included in the meta-analysis).                                                                                                                                                   | 7-9                |
| Data collection process            | 10 | Describe method of data extraction from reports (e.g., piloted forms, independently, in duplicate) and any processes for obtaining and confirming data from investigators.                                                                                                                                  | 7-9                |
| Data items                         | 11 | List and define all variables for which data were sought (e.g., PICOS, funding sources) and any assumptions and simplifications made.                                                                                                                                                                       | 6-9                |
| Risk of bias in individual studies | 12 | Describe methods used for assessing risk of bias of individual studies (including specification of whether this was done at the study or outcome level), and how this information is to be used in any data synthesis.                                                                                      | 8                  |
| Summary measures                   | 13 | State the principal summary measures (e.g., risk ratio, difference in means).                                                                                                                                                                                                                               | n.a.               |
| Synthesis of results               | 14 | Describe the methods of handling data and combining results of studies, if done, including measures of consistency (e.g., $I^2$ ) for each meta-analysis.                                                                                                                                                   | n.a.               |

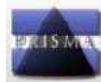

# PRISMA 2009 Checklist

Page 1 of 2

| Section/topic                 | #  | Checklist item                                                                                                                                                                                           | Reported on page # |
|-------------------------------|----|----------------------------------------------------------------------------------------------------------------------------------------------------------------------------------------------------------|--------------------|
| Risk of bias across studies   | 15 | Specify any assessment of risk of bias that may affect the cumulative evidence (e.g., publication bias, selective reporting within studies).                                                             | 8-9                |
| Additional analyses           | 16 | Describe methods of additional analyses (e.g., sensitivity or subgroup analyses, meta-regression), if done, indicating which were pre-specified.                                                         | n.a.               |
| <b>RESULTS</b>                |    |                                                                                                                                                                                                          |                    |
| Study selection               | 17 | Give numbers of studies screened, assessed for eligibility, and included in the review, with reasons for exclusions at each stage, ideally with a flow diagram.                                          | 8-9                |
| Study characteristics         | 18 | For each study, present characteristics for which data were extracted (e.g., study size, PICOS, follow-up period) and provide the citations.                                                             | 10-14              |
| Risk of bias within studies   | 19 | Present data on risk of bias of each study and, if available, any outcome level assessment (see item 12).                                                                                                | 8-9                |
| Results of individual studies | 20 | For all outcomes considered (benefits or harms), present, for each study: (a) simple summary data for each intervention group (b) effect estimates and confidence intervals, ideally with a forest plot. | 10-14              |
| Synthesis of results          | 21 | Present results of each meta-analysis done, including confidence intervals and measures of consistency.                                                                                                  | n.a.               |
| Risk of bias across studies   | 22 | Present results of any assessment of risk of bias across studies (see Item 15).                                                                                                                          | 8-9                |
| Additional analysis           | 23 | Give results of additional analyses, if done (e.g., sensitivity or subgroup analyses, meta-regression [see Item 16]).                                                                                    | n.a.               |
| <b>DISCUSSION</b>             |    |                                                                                                                                                                                                          |                    |
| Summary of evidence           | 24 | Summarize the main findings including the strength of evidence for each main outcome; consider their relevance to key groups (e.g., healthcare providers, users, and policy makers).                     | 14-15              |
| Limitations                   | 25 | Discuss limitations at study and outcome level (e.g., risk of bias), and at review-level (e.g., incomplete retrieval of identified research, reporting bias).                                            | 15                 |
| Conclusions                   | 26 | Provide a general interpretation of the results in the context of other evidence, and implications for future research.                                                                                  | 16                 |
| <b>FUNDING</b>                |    |                                                                                                                                                                                                          |                    |
| Funding                       | 27 | Describe sources of funding for the systematic review and other support (e.g., supply of data); role of funders for the systematic review.                                                               | 3                  |

From: Moher D, Liberati A, Tetzlaff J, Altman DG, The PRISMA Group (2009). Preferred Reporting Items for Systematic Reviews and Meta-Analyses: The PRISMA Statement. PLoS Med 6(7): e1000097. doi:10.1371/journal.pmed1000097

For more information, visit: [www.prisma-statement.org](http://www.prisma-statement.org).

Page 2 of 2

For peer review only - <http://bmjopen.bmj.com/site/about/guidelines.xhtml>

# BMJ Open

## How people fit in at work: A systematic review of the association between person-organisation and person-group fit with staff outcomes in healthcare

|                                 |                                                                                                                                                                                                                                                                                                                                                                                                                                                                                         |
|---------------------------------|-----------------------------------------------------------------------------------------------------------------------------------------------------------------------------------------------------------------------------------------------------------------------------------------------------------------------------------------------------------------------------------------------------------------------------------------------------------------------------------------|
| Journal:                        | <i>BMJ Open</i>                                                                                                                                                                                                                                                                                                                                                                                                                                                                         |
| Manuscript ID                   | bmjopen-2018-026266.R1                                                                                                                                                                                                                                                                                                                                                                                                                                                                  |
| Article Type:                   | Research                                                                                                                                                                                                                                                                                                                                                                                                                                                                                |
| Date Submitted by the Author:   | 12-Feb-2019                                                                                                                                                                                                                                                                                                                                                                                                                                                                             |
| Complete List of Authors:       | Herkes, Jessica; Macquarie University, Australian Institute of Health Innovation<br>Churruca, Kate; Macquarie University, Australian Institute of Health Innovation; Macquarie University<br>Ellis, Louise A.; Macquarie University, Institute of Health Innovation<br>Pomare, Chiara; Macquarie University Faculty of Medicine and Health Sciences, Australian Institute of Health Innovation<br>Braithwaite, Jeffrey; Macquarie University, Australian Institute of Health Innovation |
| <b>Primary Subject Heading</b>: | Health services research                                                                                                                                                                                                                                                                                                                                                                                                                                                                |
| Secondary Subject Heading:      | Health services research                                                                                                                                                                                                                                                                                                                                                                                                                                                                |
| Keywords:                       | Organisational development < HEALTH SERVICES ADMINISTRATION & MANAGEMENT, Organisation of health services < HEALTH SERVICES ADMINISTRATION & MANAGEMENT, Human resource management < HEALTH SERVICES ADMINISTRATION & MANAGEMENT                                                                                                                                                                                                                                                        |
|                                 |                                                                                                                                                                                                                                                                                                                                                                                                                                                                                         |

SCHOLARONE™  
Manuscripts

1  
2  
3 **HOW PEOPLE FIT IN AT WORK: A SYSTEMATIC REVIEW OF THE ASSOCIATION**  
4  
5 **BETWEEN PERSON-ORGANISATION AND PERSON-GROUP FIT WITH STAFF**  
6  
7 **OUTCOMES IN HEALTHCARE**  
8  
9  
10  
11

12 Herkes, J\*<sup>1</sup>

14 Churruca, K<sup>1</sup>

16 Ellis, LA<sup>1</sup>

18 Pomare, C<sup>1</sup>

20 Braithwaite, J<sup>1</sup>

22  
23  
24  
25  
26 <sup>1</sup>Centre for Healthcare Resilience and Implementation Science, Australian Institute of Health  
27  
28 Innovation, Macquarie University.  
29

30  
31  
32  
33 \*Corresponding Author

34  
35 [jess.herkes@mq.edu.au](mailto:jess.herkes@mq.edu.au)

36  
37 Level 6, 75 Talavera Rd

38  
39 Macquarie University  
40  
41  
42  
43

44 Word count: 3494  
45  
46  
47  
48  
49  
50  
51  
52  
53  
54  
55  
56  
57  
58  
59  
60

## ABSTRACT

**Objectives:** People interact with their work environment through being, to a greater or lesser extent, compatible with aspects of their setting. This interaction between person and environment is particularly relevant in healthcare settings where compatibility affects not only the healthcare professionals, but also potentially the patient. One way to examine this association is to investigate person-organisation (P-O) fit, and person-group (P-G) fit. This systematic review aimed to identify and synthesise knowledge on both P-O and P-G fit in healthcare to determine their association with staff outcomes. It was hypothesised that there would be a positive relationship between fit and staff outcomes, such that the experience of compatibility and 'fitting in' would be associated with better staff outcomes.

**Design:** A systematic review was conducted based on an extensive search strategy guided by PRISMA to identify relevant literature.

**Data Sources:** CINAHL Complete, EMBASE, Ovid MEDLINE, PsycINFO and Scopus.

**Eligibility Criteria:** Articles were included if they were empirical studies, published in peer-reviewed journals in English language, set in a healthcare context, and addressed the association that staff outcomes have to P-O and/or P-G fit.

**Data Extraction and Synthesis:** Included texts were examined for study characteristics, fit constructs examined, and types of staff outcomes assessed. The Quality Assessment Tool was used to assess risk of bias.

**Results:** Twenty-eight articles were included in the review. Of these, 96.4% (27/28) reported a significant, positive association between perception of fit and staff outcomes in healthcare contexts, such that a sense of compatibility had various positive implications for staff, including job satisfaction and retention.

**Conclusion:** Although the results, as with all systematic reviews, are prone to bias and definitional ambiguity, they are still informative. Generally, the evidence suggests an association between



1  
2  
3 employees' perceived compatibility with the workplace or organisation and a variety of staff  
4  
5 outcomes in healthcare settings.  
6  
7  
8  
9

## 10 **ARTICLE SUMMARY**

### 11 **Strengths and Limitations of the study**

- 14 - Systematic review is specific to healthcare, addressing a gap in the literature and informing  
15 health professionals.  
16
- 17 - Focus specifically on the components of person-environment fit that contribute to  
18 organisational and workplace culture in healthcare settings.  
19
- 20 - Results of this review can be leveraged to inform improvements in staff outcomes.  
21
- 22 - The body of literature is relatively small, the review may have benefited from a broader  
23 search strategy to incorporate articles that used different terminology.  
24  
25  
26  
27  
28  
29  
30  
31  
32

### 33 **Competing Interests**

34 The authors have no conflicts of interest to disclose.  
35  
36  
37  
38  
39

### 40 **Funding**

41 JH was funded by a Research Training Program Master of Research (RTPMRES) stipend  
42 scholarship at Macquarie University. JB is supported by multiple NHMRC grants.  
43  
44  
45  
46  
47  
48

### 49 **Contributorship Statement**

50 JH conceptualised and drafted the manuscript. JH, KC and CP were involved in the search strategy  
51 and data extraction. KC, LAE and JB edited the manuscript and critically reviewed its intellectual  
52 content. All authors approve of the final version of the manuscript.  
53  
54  
55  
56  
57  
58  
59  
60

1  
2  
3 **Patient and Public Involvement**  
4

5 Patients and public were not involved in this research.  
6  
7  
8  
9

10 **Data Sharing Statement**  
11

12 No additional data available.  
13  
14  
15  
16  
17  
18  
19  
20  
21  
22  
23  
24  
25  
26  
27  
28  
29  
30  
31  
32  
33  
34  
35  
36  
37  
38  
39  
40  
41  
42  
43  
44  
45  
46  
47  
48  
49  
50  
51  
52  
53  
54  
55  
56  
57  
58  
59  
60

For peer review only

1  
2  
3 **HOW PEOPLE FIT IN AT WORK: A SYSTEMATIC REVIEW OF THE ASSOCIATION**  
4  
5 **BETWEEN PERSON-ORGANISATION AND PERSON-GROUP FIT WITH STAFF**  
6  
7  
8 **OUTCOMES IN HEALTHCARE**  
9  
10

11  
12 Understanding how people fit into their environment is a key aspect to understanding organisational  
13 and workplace cultures.[1-3] Research increasingly attempts to make sense of how shared attitudes,  
14 values, beliefs and practices can have downstream effects on outcomes such as productivity and staff  
15 retention.[4, 5] In healthcare contexts, culture holds consequences for both staff and patients.[2, 6]  
16 Uniquely, the presence of patients and the caring role of health providers creates an important point  
17 of departure from other contexts. Thus, we need to understand how people interact with their  
18 environment, and how culture improvement strategies can be more efficiently and sustainably  
19 implemented in the light of this knowledge.[7-12]  
20  
21  
22  
23  
24  
25  
26  
27  
28  
29

30  
31 The person-environment (P-E) fit paradigm provides one such research avenue to further  
32 understand culture, focusing on *how people perceive themselves in relation to their work*  
33 *environment*. The P-E fit theory describes the compatibility of the individual and an aspect of their  
34 work context; for example, fit between the person and the work group (P-G fit) or organisation (P-O  
35 fit).[13-15] P-E fit research measures the interacting individual and contextual factors that determine  
36 the compatibility of an individual employee with aspects of his or her environment. Components of  
37 the environment (e.g., the organisation, the job) are studied separately, as it is postulated they may  
38 have different effects on staff outcomes.[16] In this theory, *fit* is defined as a sense of belonging  
39 where: 1) at least one entity (e.g., the person) fulfils the needs of the other (e.g., the organisation); 2)  
40 the entities share similar characteristics; or 3) both 1) and 2) occur.[15] **Table 1** offers definitions of  
41 the commonly identified components of P-E fit (including supplementary, complementary, needs-  
42 supplies and demands-abilities fit) in the literature.  
43  
44  
45  
46  
47  
48  
49  
50  
51  
52  
53  
54  
55  
56  
57  
58  
59  
60

**Table 1. Important definitions of the components of P-O and P-G fit**

| Term                             | Definition                                                                                                                     | Associated Key Terms                              |
|----------------------------------|--------------------------------------------------------------------------------------------------------------------------------|---------------------------------------------------|
| Supplementary/<br>similarity fit | Compatibility in which the individual and the environment are congruent (e.g., similar values, personality or goals).[15, 17]  | Fit, congruence, similarity<br>fit, compatibility |
| Complementary<br>fit             | Fit in which the individual or organisation fills a gap in, adds something unique to, or “makes whole” the other.[17-19]       | Uniqueness                                        |
| Needs-supplies<br>fit            | A feeling of fit in which the needs, inclinations or requirements of the person are fulfilled by the work environment.[15, 20] | Supplies-values fit*                              |
| Demands-<br>abilities fit        | Fit in which the individual has the capabilities and capacity to meet the demands of the environment.[15]                      | N.a.                                              |

Sources: [15, 17-20].

\*For simplicity, this term will not be used in this review to describe needs-supplies fit.

Past reviews of P-E fit, although useful in highlighting the relevance of the topic, have limited utility to healthcare specifically, because of its unique siloed culture and reputation for tribalism, leading to increased burnout compared to other workplaces.[1, 3, 6, 21] Most previous reviews synthesised information from across other industries.[22] While there have been quite a range of studies investigating P-E specifically in healthcare settings (such as hospitals,[23] pharmaceutical distribution firms,[22] and elderly care facilities,[24]) examining outcomes more typically associated with caring work (e.g., burnout), these findings have not yet been rigorously synthesised.[15, 17, 19, 25] This could be of importance to healthcare providers, researchers, and policymakers in order to

1  
2  
3 more clearly understand the components of change and improvement in the organisation and  
4  
5 workplace.  
6

7  
8 Additionally, past systematic reviews on the fit concept have tended to focus exclusively on  
9  
10 compatibility between employees and one element of their environment, such as the person-  
11  
12 organisation (P-O) or person-group (P-G) fit,[15, 17, 25] or alternatively examined P-E fit as a  
13  
14 whole, without differentiation of environmental components.[14] These approaches do not account  
15  
16 for the possible interactions among different types of fit (i.e., evidence suggests that employees may  
17  
18 simultaneously experience different levels of fit with their organisation and their work group).[26]  
19  
20

21  
22 In research investigating P-E fit, one of the most important downstream effects to consider is  
23  
24 the impact of fit perceptions on the staff themselves. Although the aim of studying organisational  
25  
26 culture in healthcare is often ultimately to improve patient outcomes, employees are the first point of  
27  
28 reference in attempts to alter, modify and ultimately transform organisational culture.[27-34] Staff  
29  
30 outcomes are particularly important to understand in healthcare settings because of frequent reports  
31  
32 of employee burnout, stress, intent to leave and turnover (see **Figure 1** for a graphical depiction).[18,  
33  
34 35-38] By first understanding the factors, such as P-E fit that influence these outcomes in healthcare  
35  
36 settings, initiatives may be developed to improve staff well-being or reduce, for example, negative  
37  
38 organisational cultures.[27-34]  
39  
40  
41  
42  
43  
44

45 **[Insert Figure 1 here]**  
46  
47  
48

49  
50 In the present systematic review, available evidence for the compatibility of staff with the culture of  
51  
52 their organisation or workplace, and the effect of this compatibility on staff outcomes, is examined  
53  
54 for the first time in healthcare settings. Because of their respective applicability to organisational and  
55  
56 workplace cultures, it was decided that both P-O and P-G fit would be examined. Therefore, the aim  
57  
58 of this systematic review was to *identify and synthesise knowledge on both P-O and P-G fit in*  
59  
60

1  
2  
3 *healthcare settings to determine their association with staff outcomes.* It was postulated that the  
4 majority of studies would show a positive relationship between fit and staff outcomes, such that  
5 increased fit would be associated with more positive outcomes for staff.  
6  
7  
8  
9

## 10 11 12 **METHODS**

### 13 14 15 Eligibility criteria

16  
17 The inclusion criteria consisted of five points that needed to be satisfied for an article to be included  
18 in the review. These were: 1) must be published in English language; 2) set in a healthcare context;  
19 3) published in a peer-reviewed journal; 4) empirical research; and 5) addresses the association of  
20 staff outcomes with P-O and/or P-G fit. Articles were excluded if they did not meet all five criteria.  
21  
22 All types of “healthcare” settings were eligible for inclusion in the review, encompassing any front-  
23 line clinical environment where health professionals (including medical staff, nurses, allied health  
24 professionals, paramedics and pharmacists) directly interact with patients, residents, or  
25 consumers.[2] Additionally, all types of empirical studies were considered, including longitudinal  
26 and cross-sectional analysis, quantitative, qualitative and mixed-methods designs. Each of these  
27 methods, if conducted in a valid and rigorous way, had the potential to provide insights by which to  
28 address the study’s aim.  
29  
30  
31  
32  
33  
34  
35  
36  
37  
38  
39  
40  
41  
42  
43  
44

### 45 46 Information sources

47 Relevant databases were identified for searching: CINAHL Complete, EMBASE, Ovid MEDLINE,  
48 PsycINFO and Scopus. The general search strategy (**Table 2**) was cross-checked with related  
49 systematic reviews to ensure relevant keywords were incorporated.[4, 5] The strategy aimed to  
50 include different components within P-G and P-O fit. Hence, the strategy encompassed general terms  
51 (e.g., “person-organisation fit”) as well as more specific terms (e.g., “supplementary”).[15, 17] The  
52 search strategy also endeavoured to identify staff outcomes, including but not limited to work  
53  
54  
55  
56  
57  
58  
59  
60

attitude,[25, 39] staff satisfaction,[33] burnout,[29-31] work stress,[28, 32, 40, 41] and organisational commitment.[34]

**Table 2. General search strategy**

| <b>Keyword</b>     | <b>Related terms/synonyms</b>                                                                                                                                                                                                                                                                                                                                                                                                                                                                                                                                            | <b>Alternative terms</b>                                 |
|--------------------|--------------------------------------------------------------------------------------------------------------------------------------------------------------------------------------------------------------------------------------------------------------------------------------------------------------------------------------------------------------------------------------------------------------------------------------------------------------------------------------------------------------------------------------------------------------------------|----------------------------------------------------------|
| P-O and P-G fit    | Person*organisation fit OR supplementary fit OR complementary fit OR needs-supplies fit OR supplies-values fit OR demands-abilities fit OR supplementary congruence OR complementary congruence OR similarity fit OR value congruence OR goal congruence OR personality congruence OR person-group fit OR person-team fit                                                                                                                                                                                                                                                | Organization                                             |
| Healthcare context | Health organisation* OR hospital* OR health facilit* OR acute care OR primary care OR primary health care OR health context OR health setting OR health service OR health*care OR tertiary care OR nurse* OR health profession* OR doctor OR GP OR physician* OR dentist* OR health OR health care service* OR gyn*ecologist* OR h*ematologist* OR internist* OR obstetrician* OR p*ediatician* OR pharmacist* OR physiotherapist* OR psychiatrist* OR psychologist* OR radiologist* OR surgeon* OR surgery OR therapist* OR counse*lor* OR neurologist* OR optometrist* | Health care<br>Healthcare<br>Health-care<br>Organization |
| Staff outcomes     | Burnout OR staff outcome* OR job satisfaction OR staff satisfaction OR employee satisfaction OR employee                                                                                                                                                                                                                                                                                                                                                                                                                                                                 | Organization                                             |

| Keyword | Related terms/synonyms                                                                                                                                                                                                                                                                                                                    | Alternative terms |
|---------|-------------------------------------------------------------------------------------------------------------------------------------------------------------------------------------------------------------------------------------------------------------------------------------------------------------------------------------------|-------------------|
|         | outcome* OR retention OR staff recognition OR employee<br>recognition OR intention to stay OR intention to leave OR<br>debrief* OR intent to turnover OR turnover intention OR<br>organisation* commitment OR stress OR work attitude OR<br>occupational hazard* OR collegiality OR working<br>relationship* OR teamwork OR collaboration |                   |

The symbol \* is used by the databases to symbolise truncation.

At least one keyword was needed from each row.

The initial search was conducted on April 3, 2017, and then updated on January 22, 2019 to include articles published up until the end of 2018. The results were imported into EndNote by JH, who then deleted duplicate articles.[42] Additionally, snowballing was conducted as systematic, narrative, or scoping reviews were identified and their reference lists searched for other potential articles to include. The reference lists of included articles were subject to the same process. For the complete search strategy, please see **Appendix 1**.

#### Selection and data collection process

Guided by the Preferred Reporting Items for Systematic review and Meta-Analyses (PRISMA) statement,[43] an initial title and abstract review was completed by JH based on the inclusion criteria (must be published in English language, be set in a healthcare context, be published in a peer-reviewed journal article by the end of 2018, and must address the association between staff outcomes and P-O and/or P-G fit). Two authors (JH and CP) independently reviewed 10% of the EndNote Library, and then discussed results until consensus was reached.[44] A full text review was



1  
2  
3 then conducted by JH. Results were summarised and synthesised. Included articles were sorted  
4  
5 according to the data type, setting, staff outcomes measured, and types of fit studied.  
6  
7  
8  
9

#### 10 Data items

11  
12 Information from each included study was extracted, including their aims, methods (qualitative,  
13  
14 quantitative or mixed-method; cross-sectional or longitudinal), results and conclusions. The staff  
15  
16 outcomes and type of fit studied was also recorded. Definitions of fit components were compared to  
17  
18 the definitions of this systematic review, and any discrepancies were recorded.  
19  
20  
21  
22

#### 23 Bias

24  
25 It was anticipated that there would be biases in individual studies. The Quality Assessment Tool[45]  
26  
27 was used to assess the bias and quality across nine categories. Each category was rated on a four-  
28  
29 point scale (from 1="very poor" to 4="good") to create a total score, with higher scores denoting  
30  
31 higher quality.[6, 46] For example, to receive a "good" rating for the "abstract and title" category, an  
32  
33 article required a clear title and structured abstract including all necessary information to understand  
34  
35 the article.[45] JH classified each article, to ensure consistency and decrease variability. The  
36  
37 classification system quality grades facilitates the categorisation of articles as low (9-23 points),  
38  
39 medium (24-29 points) and high (30-36 points).[47] There was also possible bias in the type of  
40  
41 results published, for example, publication bias.[48]  
42  
43  
44  
45  
46  
47  
48

## 49 RESULTS

### 50 Study selection

51  
52 Four hundred and ninety-eight articles were identified from the database search and snowballing  
53  
54 techniques. Once duplicates were removed, 10% of the EndNote Library was subject to the double  
55  
56 screening by two authors with a Cohen's Kappa statistic of 0.61, indicating a moderate level of  
57  
58  
59  
60

1  
2  
3 agreement.[49, 50] Two hundred and seventy-three texts did not meet the inclusion criteria, and the  
4  
5 remaining 92 articles were subjected to full-text review (**Figure 2**). Ultimately, 28 articles were  
6  
7 included in the review.  
8  
9

10  
11  
12 **[Insert Figure 2 here]**  
13  
14  
15

### 16 17 Risk of bias in individual studies

18  
19 Based on the Quality Assessment Tool,[45] the included articles scored between 23-36 points out of  
20  
21 a potential 36 points. In this study, there were three low, two medium and 23 high quality articles.[6]  
22  
23 For complete classification of each article, see **Appendix 2** in the Supplementary File.  
24  
25

### 26 27 Study characteristics

28  
29 The articles in the final analysis originated from multiple countries, including nine from the United  
30  
31 States of America (USA),[24, 51-58] four from Canada,[59-62] two from Spain,[63, 64] China,[65,  
32  
33 66] and Korea,[67, 68] and one each from Italy,[69] France,[70] Germany,[71] Greece,[72]  
34  
35 Turkey,[73] Korea,[67] the Netherlands,[74] New Zealand,[75] Norway,[76] and the United  
36  
37 Kingdom.[27] There were also differences in the study setting, though the largest proportion of  
38  
39 research was conducted in hospitals (46%) (**Table 3**).  
40  
41  
42  
43  
44  
45  
46

47 **Table 3. Setting of included studies in systematic review**  
48

| 49 Study setting           | 50 Number of included studies conducted in this context |
|----------------------------|---------------------------------------------------------|
| 51 Hospitals               | 52 13 [54, 56-60, 63, 64, 67, 69, 70, 72, 76].          |
| 53 Elderly care facilities | 54 4 [24, 55, 71, 74].                                  |
| 55 Acute care facilities   | 56 1 [62].                                              |
| 57 Ambulatory care         | 58 1 [51].                                              |

59  
60

|                           |                         |
|---------------------------|-------------------------|
| Disability services       | 1 [27].                 |
| Community health          | 1 [65].                 |
| No contextual information | 2 [66, 73].             |
| Multiple settings         | 5 [52, 53, 61, 68, 75]. |

The included studies differed in their design. Of the 28 articles, five were longitudinal,[51, 54, 57, 71, 74] and the remaining 23 were cross-sectional. The sample size varied considerably, from 56[76] to 19,149 participants.[61, 66] Additionally, the type of participants varied. The most commonly recruited participants were nurses, followed by physicians. Further information about the specific characteristics of each study is reported in **Appendix 3** of the Supplementary File.

Trends in publication of the included articles provide an insight into the potential of future research examining fit in healthcare. Only two of the 28 included articles were published before the year 2000, with the majority being published after 2010 (**Figure 3**).

**[Insert Figure 3 here]**

### Synthesis of results

Twenty-four articles exclusively measured P-O fit, two measured P-G fit, and two measured both P-O and P-G fit. The articles measuring P-G fit measured only supplementary value congruence. On the other hand, P-O fit articles measured various components of fit. The strength of the evidence for both P-O and P-G fit is examined in turn, before discussing the inferences for fit research as a whole.

### Articles measuring P-G fit

In the included studies, P-G fit, that is, the compatibility a healthcare staff member experiences with their work group, was only measured through value congruence, whereby the similarity of values

1  
2  
3 between the individual and the group are measured. All four articles identified in this category also  
4 measured similar staff outcomes, namely job satisfaction[53, 57, 73, 76] and turnover intent,[53, 57,  
5 73] although one also measured employee attitude and time pressure.[76] In all of these articles,  
6 increased value congruence was significantly positively associated with job satisfaction, and  
7 negatively associated with intention to leave the job.[53, 57, 73, 76] However, Dotson et al. [53]  
8 counter-intuitively reported that value congruence was *positively* associated with intent to leave the  
9 entire nursing profession; the authors speculated this may have been due to a lack of fulfilment of  
10 altruistic values in the nursing field, as well as external financial or bureaucratic pressures. Overall,  
11 the four studies indicated a relationship between P-G value congruence and staff outcomes,  
12 particularly a positive relationship with job satisfaction and a negative relationship with turnover  
13 intent.  
14  
15  
16  
17  
18  
19  
20  
21  
22  
23  
24  
25  
26  
27  
28  
29  
30

### 31 Articles measuring P-O fit

32  
33 In contrast to P-G fit, P-O fit, the compatibility a healthcare staff member experiences with their  
34 organisation, was measured more frequently and in terms of various components of fit. Different  
35 ways of measuring some or all of the components were present in the 26 P-O fit articles (24 that  
36 solely measured P-O fit and two that also measured P-G fit). **Table 4** reports on what authors  
37 purported to measure in their P-O fit studies.  
38  
39  
40  
41  
42  
43  
44  
45  
46  
47  
48  
49  
50  
51  
52  
53  
54  
55  
56  
57  
58  
59  
60

**Table 4. Number of studies reported for each type of P-O fit**

| <b>Component of P-O fit</b>            |                                       | <b>Number of studies<sup>a</sup></b> |
|----------------------------------------|---------------------------------------|--------------------------------------|
|                                        | Value                                 | 22                                   |
|                                        | Personality                           | 2                                    |
| Supplementary                          | Knowledge, skills and abilities (KSA) | 1                                    |
|                                        | Goal                                  | 1                                    |
|                                        | Unspecified                           | 2                                    |
|                                        | <b>Total</b>                          | <b>25<sup>b</sup></b>                |
| Complementary                          |                                       | 1                                    |
| Needs-supplies                         |                                       | 1                                    |
| Demands-abilities                      |                                       | 0                                    |
| <b>Total studies measuring P-O fit</b> |                                       | <b>26<sup>c</sup></b>                |

<sup>a</sup>Studies may have reported measuring additional types of fit in different aspects of the P-E paradigm (e.g., Rehfuss et al. (2012) measured needs-supplies and demands-abilities P-J fit).[52] These are not relevant to the aims of this systematic review and not reported here.

<sup>b</sup>The total number of articles measuring supplementary fit does not equate to the number of studies measuring each individual component of supplementary fit, as some studies measured multiple components of supplementary fit in the one study.

<sup>c</sup>The total number of articles measuring P-O fit does not equate to the number of studies measuring each individual component, as some studies measured multiple components of P-O fit in the one study.

Supplementary fit was the most commonly measured component of P-O fit in healthcare literature.[14, 15, 77, 78] P-O supplementary value congruence was measured in 22 studies. Eight articles measured value congruence through the Areas of Worklife Scale (AWS)[79] where “values”

1  
2  
3 was one of six components the scale measured.[51, 57, 59-62, 64, 66, 69] Consequently, “fit” or  
4  
5 “compatibility” was not the main focus of these articles, but they still reported the correlations with  
6  
7 outcomes including burnout,[51, 59-62, 64] turnover intent,[62] and job satisfaction[58] in a variety  
8  
9 of healthcare settings, including hospitals[58-60, 64] and acute care facilities.[62] The remaining  
10  
11 survey tools measuring P-O value congruence were heterogeneous, with five studies[52, 63, 68, 70,  
12  
13 74] using the Perceived Fit Scale from Cable and DeRue [80], five studies deriving their survey  
14  
15 questions from other sources,[56, 63, 66, 67, 72] and five studies using tools crafted specifically for  
16  
17 that study.[24, 53-55, 73] The heterogeneity of tools and study contexts made it difficult to compare  
18  
19 across studies. However, collectively these studies suggested there are several valid ways to measure  
20  
21 P-O supplementary value fit and its associations with staff outcomes.  
22  
23  
24  
25

26  
27 Personality congruence was measured in two studies, one of which also measured  
28  
29 knowledge, skills and abilities (KSA) congruence. Cha et al. [67] measured personality congruence  
30  
31 under the heading of “prosocial P-O fit”, whereby high scores on personal and prosocial identities (in  
32  
33 other words, high personality congruence) was associated with higher organisational citizenship and  
34  
35 caring behaviour from hospital employees. However, they reported an unexpected link between the  
36  
37 misfit of the person and organisation with prosocial behaviour, such that an individual would be  
38  
39 intrinsically motivated to engage in these behaviours even if the organisation did not actively  
40  
41 encourage them. Similarly, the study measuring P-O KSA and personality congruence found that the  
42  
43 overall measure of P-O fit was significantly associated with both job satisfaction and turnover  
44  
45 intention.[73] However, personality and KSA congruence were not analysed separately, so there was  
46  
47 not enough evidence to deduce individual associations between each type of and staff outcomes.  
48  
49  
50

51  
52 Supplementary goal congruence was measured in one study of job strain amongst aged care  
53  
54 workers, where Schmidt [71] found that goal incongruence was related to absenteeism and self-  
55  
56 reported burnout. As there was only one study on goal congruence, it was difficult to draw  
57  
58 conclusions regarding this particular component of supplementary fit.  
59  
60

1  
2  
3 Two studies did not specify the aspect of supplementary fit that they measured. Hatton et al.  
4  
5 [27] used an “ideal-real” organisational culture tool to test the congruence between employee’s  
6  
7 perceptions of their organisation compared to those of an “ideal” organisation. It could not be  
8  
9 determined from the original scale which component or components of supplementary fit were  
10  
11 examined. The second study measuring an unspecified component of supplementary fit was also the  
12  
13 sole article reporting a measure of complementary fit. Reportedly, each fit component  
14  
15 (supplementary and complementary) was measured through four items.[75] However, upon review  
16  
17 of the original survey items, it became apparent that the complementary fit scale consisted of items  
18  
19 that would be defined as different elements of fit (needs-supplies and supplementary).[81] This  
20  
21 combination of items made it difficult to draw theoretical conclusions from the study. Although  
22  
23 general complementary fit itself was not measured, this article indicates the potential importance of  
24  
25 needs-supplies P-O fit.  
26  
27  
28  
29

30 Zhang et al. [65] reported that needs-supplies P-O fit was directly associated with job  
31  
32 satisfaction, as well as significantly inversely associated with intent to leave among community  
33  
34 health workers in China. These results aligned with those of Cooper-Thomas et al. [75] who reported  
35  
36 a significant positive correlation of P-O fit with job satisfaction and organisational commitment, and  
37  
38 a negative correlation with intention to quit. Moreover, both studies reported that job satisfaction  
39  
40 partially mediated the relationship between needs-supplies P-O fit and intention to quit.  
41  
42  
43  
44  
45  
46

#### 47 Articles measuring P-O and P-G fit

48  
49 There was a dearth of research examining P-O and P-G fit together in healthcare, limiting knowledge  
50  
51 regarding their relationship. Of the two articles purporting to measure both P-O and P-G fit, it  
52  
53 appeared that based on the items used, one rigorously measured only P-O fit,[73] and the other did  
54  
55 not delve into the fit framework, but rather measured P-O and P-G value congruence.[53] As such, it  
56  
57 was not possible to draw any reasonable conclusions on the potential interactional effect between P-  
58  
59  
60

O and P-G fit on staff outcomes in health environments. This indicates the importance of definitional consistency in fit research.

#### Staff outcomes measured

In addition to the variability amongst the type of fit studied, there was also variation in the staff outcomes measured. The main types of outcomes included satisfaction, intention to quit, organisational commitment, burnout, and absenteeism (**Table 5**).

**Table 5. Staff outcomes assessed in the studies included in this review**

| Term                      | Alternative terms                                                                                                          | Included articles measuring and recording this outcome <sup>a</sup> |
|---------------------------|----------------------------------------------------------------------------------------------------------------------------|---------------------------------------------------------------------|
| Satisfaction              | Job satisfaction, work satisfaction, career satisfaction                                                                   | 17                                                                  |
| Intention to quit         | Turnover intent, intention to stay, job search behaviour, intent to leave job, intent to leave profession, actual turnover | 16                                                                  |
| Organisational commitment | Loyalty, organisational citizenship behaviour (OCB) <sup>b</sup> , caring behaviour                                        | 10                                                                  |
| Burnout                   | N.A.                                                                                                                       | 10                                                                  |
| Stress                    | Time pressure, job stress, psychosomatic complaints                                                                        | 4                                                                   |
| Absenteeism               | Sick leave behaviour                                                                                                       | 4                                                                   |
| Other                     | Eg, Self-rated health, accident propensity, employee attitude                                                              | 3                                                                   |



1  
2  
3 <sup>a</sup>The total of this column does not equate to the total number of included articles, as some studies  
4  
5 measured outcomes from more than one column.  
6

7  
8 <sup>b</sup>Organisational citizenship behaviour (OCB) is defined as voluntary actions undertaken by an  
9  
10 employee and directed towards individuals or organisations. The actions may not be rewarded, but  
11  
12 they contribute to the work environment.[67]  
13  
14

## 15 16 17 Overall findings

18  
19 Overall, 96.4% of included articles (27/28) reported a significant, positive relationship between P-O  
20  
21 or P-G fit and staff outcomes, such that greater compatibility with one's workplace or organisation  
22  
23 was associated with more positive outcomes for staff (e.g., lower levels of burnout, increased  
24  
25 satisfaction). Of these, 22 articles reported an exclusively positive relationship, showing that the  
26  
27 relationship between fit and each measured staff outcome was in the direction hypothesised. A  
28  
29 further five articles reported a partially positive relationship; in other words, some staff outcomes  
30  
31 had a significant association with fit in the direction hypothesised, but the association with other  
32  
33 outcomes did not reach a level of statistical significance (e.g., a reported positive association  
34  
35 between measures of fit and job satisfaction and loyalty, but no association with turnover).[72]  
36  
37  
38 Finally, one article reported no significant association between the two entities (namely, P-O value  
39  
40 fit and actual turnover).[74]  
41  
42  
43  
44  
45  
46

## 47 **DISCUSSION**

48  
49 The results of this review provided robust evidence for the initial postulation that stronger P-O fit,  
50  
51 and to a lesser extent P-G fit, would be associated with more positive outcomes, such as  
52  
53 organisational commitment and job satisfaction, and decreased intent to quit, burnout, and stress.  
54  
55 Even with a relatively small number of P-G fit articles compared with P-O fit articles, the trend  
56  
57 across the results suggests the importance of *both* constructs in increasing an individuals' perception  
58  
59  
60

1  
2  
3 of fit, and that this is conducive to better outcomes for staff working in healthcare. Hence, this  
4  
5 review highlights the importance for people's well-being in feeling a sense of fit with both their  
6  
7 work-group and their wider organisation—a result that confirms previous results from systematic  
8  
9 reviews not conducted in healthcare.[15, 82] Specifically, evidence suggests the importance of  
10  
11 similar values between individuals and their workplace and organisation.[24, 53, 55-57, 61, 76] Not  
12  
13 only may this have positive downstream effects on the employees themselves, but it also has the  
14  
15 potential to positively impact on the outcomes they produce in the work environment which, in  
16  
17 healthcare, equates to better patient care.[6]  
18  
19  
20

21  
22 Research regarding the process of individual adaption to the work context is growing,[83, 84]  
23  
24 which will add richness to the understanding of how to most effectively foster perceived fit and  
25  
26 improve cultures in healthcare settings. This review will, we hope, offer welcome guidance to  
27  
28 policymakers, managers and other custodians of organisational culture in healthcare on the  
29  
30 importance of enhancing fit perceptions between individuals and their work environments.  
31  
32 Ultimately, such strategies aim to increase mutually beneficial fit at work.  
33  
34

35  
36 The results have important implications for clinicians, allied health professionals, healthcare  
37  
38 managers, and policymakers involved in the development and implementation of culture change  
39  
40 interventions. Most apparently, they suggest the importance of individuals being motivated to seek  
41  
42 work at organisations that hold similar values and goals to their own.[53, 85] Alternatively, in the  
43  
44 case of employed individuals being incompatible with the workplace or organisation, the results  
45  
46 suggest the importance of bridging this gap.[86-88] The systematic review is the first in the context  
47  
48 of healthcare to highlight the mutual benefit of adaption and flexibility of both the individual and the  
49  
50 environment, in order to create better fit between healthcare staff and the places they work, which  
51  
52 may also potentially improve patient care.  
53  
54  
55  
56  
57  
58  
59  
60

### Strengths and limitations

There are several strengths and limitations to this study. The review searched multiple databases, and was thorough and rigorous, applying PRISMA methodology, and assessing bias and quality. Bias is unavoidable, and thus readers should be mindful of this potential bias when judging the strength of evidence for the association between P-O and P-G fit with staff outcomes. Additionally, the included articles were inconsistent and heterogeneous in their labelling and measuring of fit. For example, some articles measured value congruence but did not explain the wider concept of supplementary fit,[59, 64] whilst others specified this information.[52, 74] This meant we had to make some choices regarding the identification and grouping of articles for this review. In the future, empirical studies of P-O and P-G fit in health settings could address these limitations by explicitly identifying what facet of fit they are studying, and linking this to their measurement tool.

### CONCLUSION

The results of this systematic review indicate that fitting in at work is conducive to improved staff outcomes in healthcare. The results argue in favour of the intrinsic benefit of improving staff well-being. However, it remains unclear of *how* to best enhance organisational cultures, to therefore have downstream effects on employees productivity and quality of work.

## REFERENCES

1. Braithwaite J. A lasting legacy from Tony Blair? NHS culture change. *J R Soc Med*. 2011;104(2):87-9.
2. Braithwaite J, Herkes J, Ludlow K, Lamprell G, Testa L. The association between organisational and workplace cultures, and patient outcomes: systematic review protocol. *BMJ Open*. 2016;6(12):e013758.
3. Braithwaite J, Hyde P, Pope C. *Culture and Climate in Health Care Organizations*. Basingstoke, London: Palgrave Macmillan; 2010.
4. Parmelli E, Flodgren G, Beyer F, Baillie N, Schaafsma ME, Eccles MP. The effectiveness of strategies to change organisational culture to improve healthcare performance: a systematic review. *Implement Sci*. 2011;6(1):1-8.
5. MacDavitt K, Chou S, Stone P. Organizational climate and health care outcomes. *Jt Comm J Qual Patient Saf*. 2007;33:45-56.
6. Braithwaite J, Herkes J, Ludlow K, Testa L, Lamprell G. The association between organisational and workplace cultures, and patient outcomes: systematic review. *BMJ Open*. 2017;7(11):e017708.
7. Higgins J, Altman D, Sterne J. Chapter 8: assessing risk of bias in included studies. In: Higgins J, Green S, editors. *Cochrane Handbook for Systematic Reviews of Interventions Version 5.1.0: The Cochrane Collaboration*; 2011.
8. Larson E, Early E, Cloonan P, Sugrue S, Parides M. An organisational climate intervention associated with increased handwashing and decreased nosocomial infections. *J Behav Med*. 2000;26(1):14-22.
9. Nosrati H, Clay-Williams R, Cunningham F, Hillman K, Braithwaite J. The role of organisational and cultural factors in the implementation of system-wide interventions in acute hospitals to improve patient outcomes: protocol for a systematic literature review. *BMJ Open*. 2013;3(3):e002268.
10. Sacks G, Shannon E, Dawes A, Rollo J, Nguyen D, Russell M, et al. Teamwork, communication and safety climate: a systematic review of interventions to improve surgical culture. *BMJ Qual Saf*. 2015;24(7):458-67.
11. Nohria N, Beer M. Cracking the code of change. *Harv Bus Rev*. 2000(May-June).
12. Isouard G. Leading and managing the implementation process: the key to successful national health reform. *APJHM*. 2010;5(1):11-6.
13. Morley M. Person-organization fit. *J Manag Psychol*. 2007;22(2):109-17.
14. Kristof-Brown A, Guay R. Person-environment fit. In: Zedeck S, editor. *APA Handbook of Industrial and Organizational Psychology: Maintaining, Expanding, and Contracting the Organization*. 3: American Psychological Association; 2011. p. 3-50.
15. Kristof A. Person-organization fit: an integrative review of its conceptualizations, measurement, and implications. *Pers Psychol*. 1996;49:1-49.
16. Chatman J. Improving interactional organizational research: A model of person-organization fit. *The Academy of Management Review*. 1989;14(3):333-49.
17. Piasentin K, Chapman D. Subjective person-organization fit: bridging the gap between conceptualization and measurement. *J Vocat Behav*. 2006;69:202-21.
18. Piasentin K, Chapman D. Perceived similarity and complementarity as predictors of subjective person-organization fit. *J Occup Organ Psychol*. 2007;80:341-54.
19. dos Santos L, De Domenico S. Person-organization fit: bibliometric study and research agenda. *Eur Bus Rev*. 2015;27(6):573-92.
20. Yu K, Davis H. Autonomy's impact on newcomer proactive behaviour and socialization: a needs-supplies fit perspective. *J Occup Organ Psychol*. 2016;89:172-97.

21. Braithwaite J, Clay-Williams R, Vecellio E, Marks D, Hooper T, Westbrook M, et al. The basis of clinical tribalism, hierarchy and stereotyping: a laboratory-controlled teamwork experiment. *BMJ Open*. 2016;6(7):e012467.
22. Cennamo L, Gardner D. Generational differences in work values, outcomes and person-organisation values fit. *J Manage Psychol*. 2008;23(8):891-906.
23. Parkes L, Bochner S, Schneider S. Person-organisation fit across cultures: an empirical investigation of individualism and collectivism. *Appl Psychol Int Rev*. 2001;50(1):81-108.
24. Ren T, Hamann DJ. Employee value congruence and job attitudes: the role of occupational status. *Pers Rev*. 2015;44(4):550-66.
25. Verquer M, Beehr T, Wagner S. A meta-analysis of relations between person-organization fit and work attitudes. *J Vocat Behav*. 2003;63:473-89.
26. Vogel R, Feldman D. Integrating the levels of person-environment fit: the roles of vocational fit and group fit. *J Vocat Behav*. 2009;75:68-81.
27. Hatton C, Rivers M, Mason H, Mason L, Emerson E, Kiernan C, et al. Organizational culture and staff outcomes in services for people with intellectual disabilities. *J Intellect Disabil Res*. 1999;43(3):206-18.
28. Edwards D, Burnard P, Coyle D, Fothergill A, Hannigan B. Stress and burnout in community mental health nursing: a review of the evidence. *J Psychiatr Ment Health Nurs*. 2000;7:7-14.
29. Fong T, Ho R, Au-Yeung F, Sing C, Law K, Lee L, et al. The relationships of change in work climate with changes in burnout and depression: a 2-year longitudinal study of Chinese mental health care workers. *Psychol Health Med*. 2016;21(4):401-12.
30. Kilroy A, Flood P, Bosak J, Chenevert D. Perceptions of high-involvement work practices, person-organization fit, and burnout: a time-lagged study of health care employees. *Hum Resour Manage*. 2016:1-15.
31. Maslach C, Jackson S. The measurement of experienced burnout. *J Occup Behav*. 1981;2:99-113.
32. Shinn M, Rosario M, Morch H, Chestnut D. Coping with job stress and burnout in the human services. *J Pers Soc Psychol*. 1984;46(4):864-76.
33. Chen P, Sparrow P, Cooper C. The relationship between person-organization fit and job satisfaction. *J Manage Psychol*. 2016;31(5):946-59.
34. Kinjerski V, Skrypnek B. The promise of spirit at work: increasing job satisfaction and organizational commitment and reducing turnover and absenteeism in long-term care. *J Gerontol Nurs*. 2008;34(10):17-25.
35. Grunfeld E, Whelan T, Zitzelsberger L, Willan A, Montesanto B, Evans W. Cancer care workers in Ontario: prevalence of burnout, job stress and job satisfaction. *Can Med Assoc J*. 2000;163(2):166-9.
36. Chew J, Chan C. Human resource practices, organizational commitment and intention to stay. *Int J Manpower*. 2008;29(6):503-22.
37. Gould-Williams J, Mostafa A, Bottomley P. Public service motivation and employee outcomes in the Egyptian public sector: testing the mediating effect of person-organization fit. *J Public Adm Res Theory*. 2015;25(2):597-622.
38. Mostafa A, Gould-Williams J. Testing the mediation effect of person-organization fit on the relationship between high performance HR practices and employee outcomes in the Egyptian public sector. *Int J Hum Resour Man*. 2014;25(2):276-92.
39. Warr P, Cook J, Wall T. Scales for the measurement of some work attitudes and aspects of psychological well-being. *Occup Psychol*. 1979;52:129-48.
40. Ramirez AJ, Graham J, Richards MA, Cull A, Gregory WM. Mental health of hospital consultants: the effects of stress and satisfaction at work. *Lancet*. 1996;347:724-8.
41. Ward L. Mental health nursing and stress: maintaining balance. *Int J Ment Health Nurs*. 2011;20:77-85.

42. Analytics C. Endnote. Endnote.
43. Moher D, Liberati A, Tetzlaff J, Altman D. Preferred Reporting Items for Systematic Reviews and Meta-Analyses: the PRISMA statement. *PLoS Med*. 2009;6(7):e1000097.
44. Landis J, Koch G. The measurement of observer agreement for categorical data. *Biometrics*. 1977;33(1):159-74.
45. Hawker S, Payne S, Kerr C, Hardey M, Powell J. Appraising the evidence: reviewing disparate data systematically. *Qual Health Res*. 2002;12(9):1284-99.
46. Taylor N, Clay-Williams R, Hodgen E, Braithwaite J, Groene O. High performing hospitals: a qualitative systematic review of associated factors and practical strategies for improvement. *BMC Health Serv Res*. 2015;15:244-66.
47. Lorenc T, Petticrew M, Whitehead M, Neary D, Clayton S, Wright K, et al. Appendix 5: quality assessment for the systematic review of qualitative evidence. *Crime, Fear of Crime and Mental Health: Synthesis of Theory and Systematic Reviews of Interventions and Qualitative Evidence*. Public Health Research, No. 2.2. Southampton, United Kingdom: NIHR Journals Library; 2014.
48. Dickersin K. The existence of publication bias and risk factors for its occurrence. *JAMA*. 1990;263:1385-9.
49. Byrt T, Bishop J, Carlin J. Bias, prevalence and kappa. *J Clin Epidemiol*. 1993;46(5):423-9.
50. McHugh ML. Interrater reliability: the kappa statistic. *Biochem Med (Zagreb)*. 2012;22(3):276-82.
51. Gregory ST, Menser T. Burnout among primary care physicians: a test of the areas of worklife model. *J Healthc Manag*. 2015;60(2):133-48.
52. Rehfuss MC, Gambrell CE, Meyer D. Counselors' perceived person-environment fit and career satisfaction. *Career Dev Q*. 2012;60:145-51.
53. Dotson MJ, Dave DS, Cazier JA, Spaulding TJ. An empirical analysis of nurse retention. *J Nurs Adm*. 2014;44(2):111-6.
54. Somers MJ. Patterns of attachment to organizations: commitment profiles and work outcomes. *J Occup Organ Psychol*. 2010;83(2):443-53.
55. Ren T. Sectoral differences in value congruence and job attitudes: the case of nursing home employees. *J Bus Ethics*. 2013;112(2):213-24.
56. Kalliath TJ, Bluedorn AC, Strube MJ. A test of value congruence effects. *J Organ Behav*. 1999;20(7):1175-98.
57. Gates MG, Mark BA. Demographic diversity, value congruence, and workplace outcomes in acute care. *Res Nurs Health*. 2012;35(3):265-76.
58. Risman KL, Erickson RJ, Diefendorff JM. The impact of person-organization fit on nurse job satisfaction and patient care quality. *Appl Nurs Res*. 2016;31:121-5.
59. Leiter M, Day A, Price L. Attachment styles at work: measurement, collegial relationships, and burnout. *Burn Res*. 2015;2(1):25-35.
60. Leiter MP. A two process model of burnout and work engagement: distinct implications of demands and values. *G Ital Med Lav Ergon*. 2008;30(1 Suppl A):A52-A8.
61. Leiter MP, Frank E, Matheson TJ. Demands, values, and burnout: relevance for physicians. *Can Fam Physician*. 2009;55(12):1224-6.
62. Leiter MP, Jackson NJ, Shaughnessy K. Contrasting burnout, turnover intention, control, value congruence and knowledge sharing between Baby Boomers and Generation X. *J Nurs Manag*. 2009;17(1):100-9.
63. Bao Y, Vedina R, Moodie S, Dolan S. The relationship between value incongruence and individual and organizational well-being outcomes: an exploratory study among Catalan nurses. *J Adv Nurs*. 2013;69(3):631-41.
64. Leiter MP, Gasco'n S, Mart'inez-Jarreta B. Making sense of work life: a structural model of burnout. *J Appl Soc Psychol*. 2010;40(1):57-75.



65. Zhang M, Yan F, Wang W, Li G. Is the effect of person-organisation fit on turnover intention mediated by job satisfaction? A survey of community health workers in China. *BMJ Open*. 2017;7(2):e013872.
66. Shao J, Tang L, Wang X, Qiu R, Zhang Y, Jia Y, et al. Nursing work environment, value congruence and their relationships with nurses' work outcomes. *Journal of Nursing Management*. 2018;26(8):1091-9.
67. Cha J, Chang YK, Kim T-Y. Person-organization fit on prosocial identity: implications on employee outcomes. *J Bus Ethics*. 2014;123(1):57-69.
68. Lee S, Jang E. The relationships of person-organization fit and person-job fit with work attitudes: A moderating effect of person-supervisor fit. *Journal of Engineering and Applied Sciences*. 2017;12(14):3767-78.
69. Lamiani G, Dordoni P, Argentero P. Value congruence and depressive symptoms among critical care clinicians: The mediating role of moral distress. *Stress and Health*. 2018;34(1):135-42.
70. Gillet N, Fouquereau E, Coillot H, Cougot B, Moret L, Dupont S, et al. The effects of work factors on nurses' job satisfaction, quality of care and turnover intentions in oncology. *Journal of Advanced Nursing*. 2018;74(5):1208-19.
71. Schmidt KH. The relation of goal incongruence and self-control demands to indicators of job strain among elderly care nursing staff: a cross-sectional survey study combined with longitudinally assessed absence measures. *Int J Nurs Stud*. 2010;47(7):855-63.
72. Bellou V. Matching individuals and organizations: evidence from the Greek public sector. *Employee Relat*. 2009;31(5):455-70.
73. Findik M, Ögüt A, Çağliyan V. An evaluation about person-organization fit, job satisfaction, and turnover intention: a case of health institution. *Mediterr J Soc Sci*. 2013;4(11):434-40.
74. Boon C, Biron M. Temporal issues in person-organization fit, person-job fit and turnover: the role of leader-member exchange. *Hum Relat*. 2016;69(12):2177-200.
75. Cooper-Thomas HD, Poutasi C. Attitudinal variables predicting intent to quit among Pacific healthcare workers. *Asia Pac J Hum Resour*. 2011;49(2):180-92.
76. Verplanken B. Value congruence and job satisfaction among nurses: a human relations perspective. *Int J Nurs Stud*. 2004;41(6):599-605.
77. Guan Y, Deng H, Risavy S, Bond M, Li F. Supplementary fit, complementary fit, and work-related outcomes: the role of self-construal. *Appl Psychol Int Rev*. 2010;60(2).
78. Mehtap O, Alniacik E. Can dissimilar be congruent as well as the similar? A study on the supplementary and complementary fit. *Procedia Soc Behav Sci*. 2014;150:1111-9.
79. Leiter MP, Maslach C. Areas of worklife: a structured approach to organizational predictors of job burnout. *Emotional and Physiological Processes and Positive Intervention Strategies: Research in Occupational Stress and Well Being*. 3: Elsevier Ltd.; 2004. p. 91-134.
80. Cable D, DeRue D. The convergent and discriminant validity of subjective fit perceptions. *J Appl Psychol*. 2002;87(5):875-84.
81. Saks A, Ashforth B. Is job search related to employment quality? It all depends on fit. *J Appl Psychol*. 2002;87(4):646-54.
82. Kristof-Brown A, Zimmerman R, Johnson E. Consequences of individuals' fit at work: a meta-analysis of person-job, person-organization, person-group, and person-supervisor fit. *Pers Psychol*. 2005;58:281-342.
83. Herkes J, Churrua K, Ellis LA, Braithwaite J, editors. Coordinating care across boundaries in mental health facilities: a qualitative approach to understanding perceptions of fit at work. *Organ Behav Health Care*; 2018 13-16 May; Montreal, Canada.
84. Ryan A, Kristof-Brown A. Focusing on personality in person-organization fit research: unaddressed issues. In: Barrick M, Ryan A, editors. *Personality and Work: Reconsidering the Role of Personality in Organizations*. 1 ed. San Francisco, CA: Jossey-Bass; 2003. p. 262-88.
85. McDonald P, Gandz J. Getting value from shared values. *Organ Dyn*. 1992;20(3):64-77.

- 1  
2  
3 86. Judge T, Cable D. Applicant personality, organizational culture, and organization attraction.  
4 Pers Psychol. 1997;50:359-94.  
5 87. Lievens F, Decaestecker C, Coetsier P, Geiraert J. Organisational attractiveness for  
6 prospective applicants: a person-organisation fit perspective. Appl Psychol Int Rev. 2001;50(1):30-  
7 51.  
8 88. Saks A, Ashforth B. A longitudinal investigation of the relationship between job information  
9 sources, applicant perceptions of fit, and work outcomes. Pers Psychol. 1997;50:395-426.  
10  
11  
12  
13  
14  
15  
16  
17  
18  
19  
20  
21  
22  
23  
24  
25  
26  
27  
28  
29  
30  
31  
32  
33  
34  
35  
36  
37  
38  
39  
40  
41  
42  
43  
44  
45  
46  
47  
48  
49  
50  
51  
52  
53  
54  
55  
56  
57  
58  
59  
60



1  
2  
3 **Figure legends to be inserted into manuscript**  
4  
5

6 **Figure 1. Rich picture modelling the process of fit and adaptation [83]**  
7

8  
9 **Figure 2. Search process**  
10

11 Total for “reasons for exclusion” does not add up to the total number of articles  
12 excluded, as some articles had multiple reasons for exclusion.  
13  
14

15  
16  
17  
18 **Figure 3. Trends in the frequency of published P-O and P-G fit research**  
19  
20 **conducted in a health setting over time**  
21

22 Bars represent the number of peer-reviewed articles on this topic in the corresponding  
23 year (as established from inclusion in the systematic review).  
24  
25  
26  
27  
28  
29  
30  
31  
32  
33  
34  
35  
36  
37  
38  
39  
40  
41  
42  
43  
44  
45  
46  
47  
48  
49  
50  
51  
52  
53  
54  
55  
56  
57  
58  
59  
60

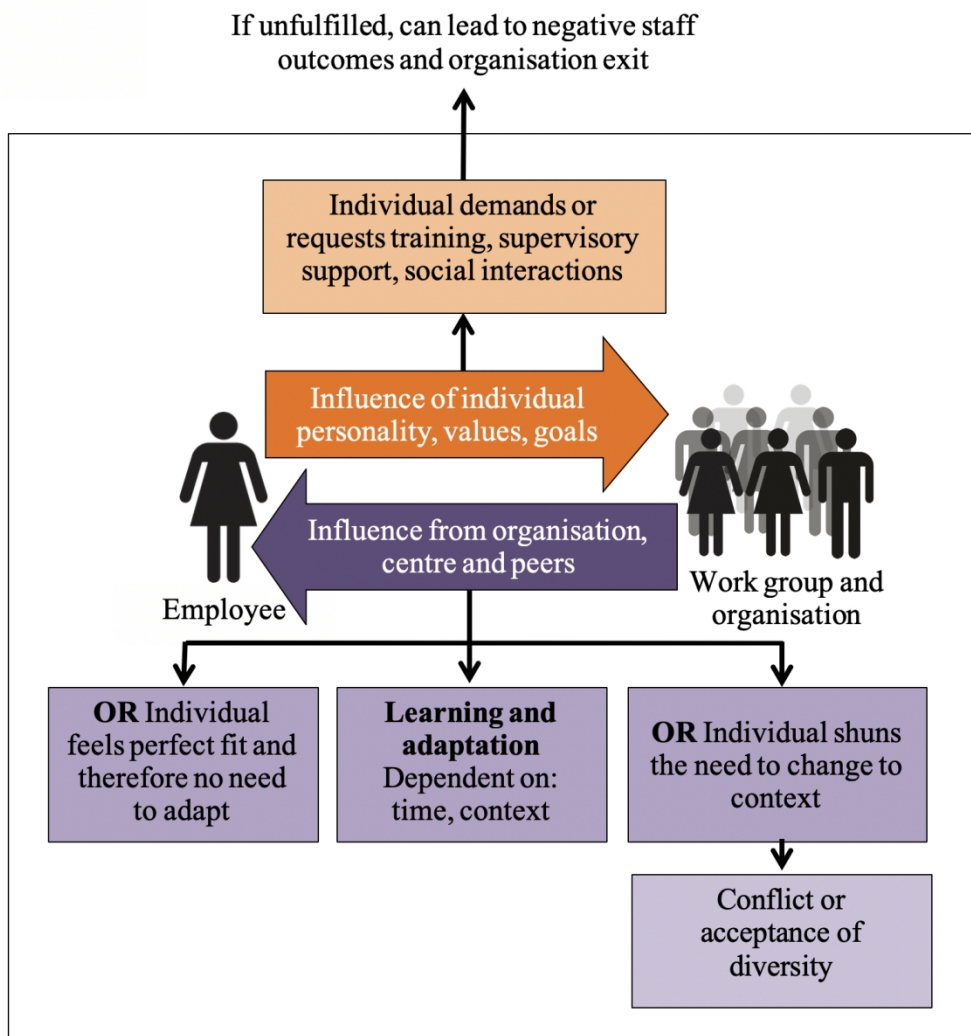

Figure 1. Rich picture modelling the process of fit and adaptation [83]

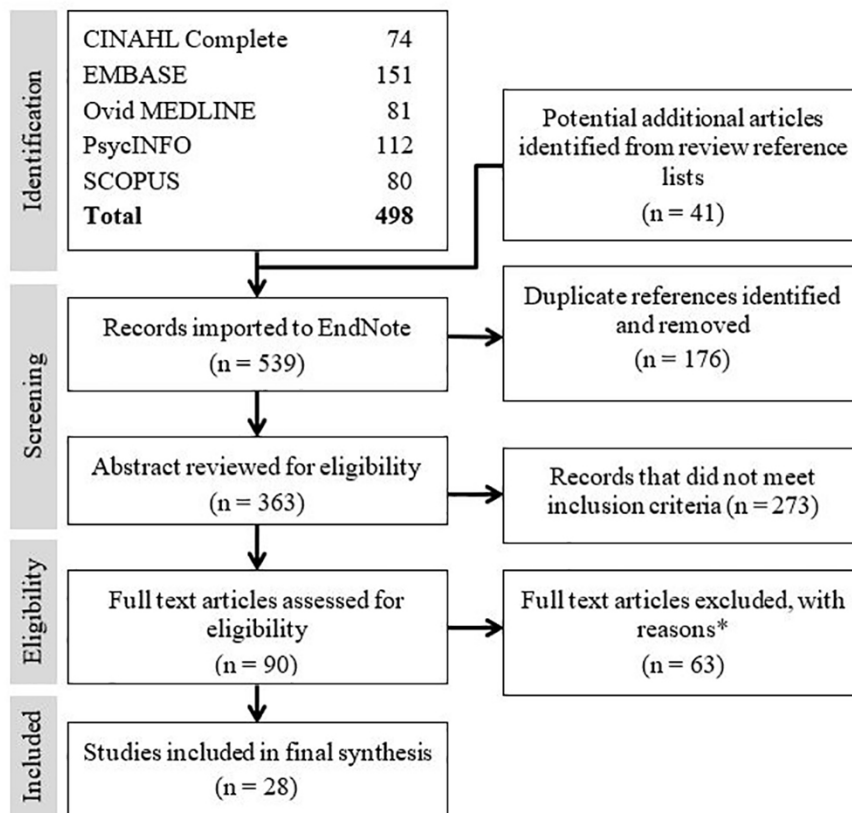

33 **\*Reason for exclusion of articles with full text review**

| Reason for exclusion              | Number of texts excluded for this reason |
|-----------------------------------|------------------------------------------|
| Full text not available           | 6                                        |
| Language not in English           | 4                                        |
| Not primary empirical study       | 5                                        |
| Not in healthcare context         | 33                                       |
| Not peer reviewed journal article | 5                                        |
| Does not measure association      | 9                                        |

44  
45 Figure 2. Search process

46  
47 Total for "reasons for exclusion" does not add up to the total number of articles excluded, as some articles  
48 had multiple reasons for exclusion.

49 90x116mm (300 x 300 DPI)

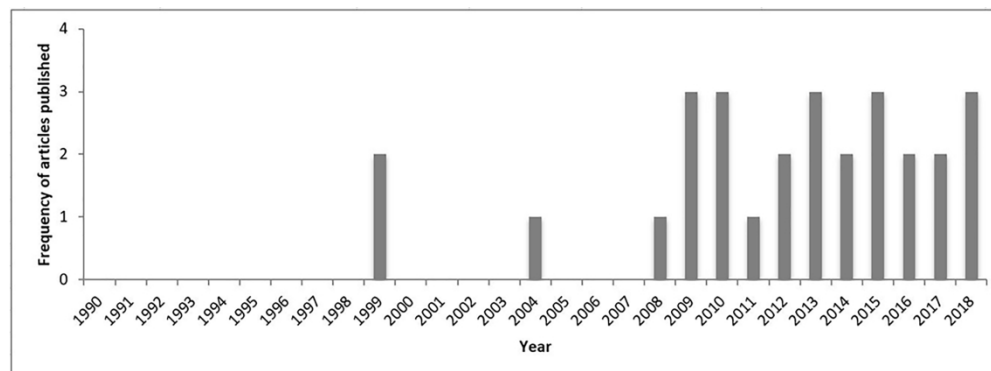

Figure 3. Trends in the frequency of published P-O and P-G fit research conducted in a health setting over time

Bars represent the number of peer-reviewed articles on this topic in the corresponding year (as established from inclusion in the systematic review).

240x90mm (300 x 300 DPI)

1  
2  
3  
4  
5 **HOW PEOPLE FIT IN AT WORK: A SYSTEMATIC REVIEW OF THE ASSOCIATION BETWEEN PERSON-ORGANISATION**  
6  
7 **AND PERSON-GROUP FIT WITH STAFF OUTCOMES IN HEALTHCARE**  
8  
9

10  
11 Supplementary File  
12  
13  
14  
15  
16  
17

18 The following Supplementary File includes three appendices to complement the main document, with titles as follows:  
19

20 Appendix 1: Complete Search Strategy

21 Appendix 2: Quality Assessment Tool Ratings of Articles Included in Systematic Review  
22

23 Appendix 3: Information About Included Articles from the Systematic Review  
24  
25  
26  
27  
28  
29  
30  
31  
32  
33  
34  
35  
36  
37  
38  
39  
40  
41  
42  
43  
44  
45  
46

## APPENDIX 1: Complete Search Strategy

Please see below for the search terms used to complete the searches for each electronic database. These are CINAHL Complete (**Table 1**), EMBASE (**Table 2**), Ovid MEDLINE (**Table 3**), PsycINFO (**Table 4**) and SCOPUS (**Table 5**).

### Table 1 CINAHL Complete search strategy

|   |                                                                                                                                                                                                                                                                                                                                                                                                                                                                                                                                                                             |
|---|-----------------------------------------------------------------------------------------------------------------------------------------------------------------------------------------------------------------------------------------------------------------------------------------------------------------------------------------------------------------------------------------------------------------------------------------------------------------------------------------------------------------------------------------------------------------------------|
| 1 | (MH "Job Satisfaction") OR (MH "Personnel Turnover") OR (MH "Attitude of Health Personnel+") OR (MH "Personnel Retention") OR (MH "Personnel, Health Facility+") OR (MH "Burnout, Professional+")                                                                                                                                                                                                                                                                                                                                                                           |
| 2 | (Burnout OR staff outcome* OR job satisfaction OR staff satisfaction OR employee satisfaction OR employee outcome* OR retention OR staff recognition OR employee recognition OR intention to stay OR intention to leave OR debrief* OR intent to turnover OR turnover intention OR organi*ation* commitment OR stress OR work attitude OR occupational hazard* OR collegiality OR working relationship* OR teamwork OR collaboration)                                                                                                                                       |
| 3 | 1 OR 2                                                                                                                                                                                                                                                                                                                                                                                                                                                                                                                                                                      |
| 4 | (Health organi*ation* OR hospital* OR health facilit* OR acute care OR primary care OR primary health care OR health context OR health setting OR health service OR health*care OR tertiary care or nurse* or health profession* or doctor or GP or physician* or dentist* or health or health care service* or gyn*ecologist* or h*ematologist* or internist* or obstetrician* or p*ediatrician* or pharmacist* or physiotherapist* or psychiatrist* or psychologist* or radiologist* or surgeon* or surgery or therapist* or counse*lor* or neurologist* or optometrist*) |
| 5 | (person-organi*ation fit or person organi*ation fit or supplementary fit or complementary fit or needs-supplies fit or supplies-values fit or demands-abilities fit or supplementary congruence or complementary congruence or similarity fit or value congruence or goal congruence or personality congruence or person-group fit or person-team fit)                                                                                                                                                                                                                      |
| 6 | 3 AND 4 AND 5                                                                                                                                                                                                                                                                                                                                                                                                                                                                                                                                                               |

### Table 2. EMBASE search strategy

|   |                                                                                                                                                                                                                                                                                                                                                                                                                                                                                                             |
|---|-------------------------------------------------------------------------------------------------------------------------------------------------------------------------------------------------------------------------------------------------------------------------------------------------------------------------------------------------------------------------------------------------------------------------------------------------------------------------------------------------------------|
| 1 | (person-organi*ation fit or person organi*ation fit or supplementary fit or complementary fit or needs-supplies fit or supplies-values fit or demands-abilities fit or supplementary congruence or complementary congruence or similarity fit or value congruence or goal congruence or personality congruence or person-group fit or person-team fit).mp. [mp=title, abstract, heading word, drug trade name, original title, device manufacturer, drug manufacturer, device trade name, keyword, floating |
|---|-------------------------------------------------------------------------------------------------------------------------------------------------------------------------------------------------------------------------------------------------------------------------------------------------------------------------------------------------------------------------------------------------------------------------------------------------------------------------------------------------------------|

1  
2  
3  
4  
5  
6  
7  
8  
9  
10  
11  
12  
13  
14  
15  
16  
17  
18  
19  
20  
21  
22  
23  
24  
25  
26  
27  
28  
29  
30  
31  
32  
33  
34  
35  
36  
37  
38  
39  
40  
41  
42  
43  
44  
45  
46

|    |                                                                                                                                                                                                                                                                                                                                                                                                                                                                                                                                                                                                                                                                                                                                              |
|----|----------------------------------------------------------------------------------------------------------------------------------------------------------------------------------------------------------------------------------------------------------------------------------------------------------------------------------------------------------------------------------------------------------------------------------------------------------------------------------------------------------------------------------------------------------------------------------------------------------------------------------------------------------------------------------------------------------------------------------------------|
|    | subheading]                                                                                                                                                                                                                                                                                                                                                                                                                                                                                                                                                                                                                                                                                                                                  |
| 2  | (person adj3 group).ti,ab.                                                                                                                                                                                                                                                                                                                                                                                                                                                                                                                                                                                                                                                                                                                   |
| 3  | (person adj3 organi*ation).ti,ab.                                                                                                                                                                                                                                                                                                                                                                                                                                                                                                                                                                                                                                                                                                            |
| 4  | 1 OR 2 OR 3                                                                                                                                                                                                                                                                                                                                                                                                                                                                                                                                                                                                                                                                                                                                  |
| 5  | (Health organi*ation* or hospital* or health facilit* or acute care or primary care or primary health care or health context or health setting or health service or health*care or tertiary care or nurse* or health profession* or doctor or GP or physician* or dentist* or health or health care service* or gyn*ecologist* or h*ematologist* or internist* or obstetrician* or p*ediatrician* or pharmacist* or physiotherapist* or psychiatrist* or psychologist* or radiologist* or surgeon* or surgery or therapist* or counse*lor* or neurologist* or optometrist*).mp. [mp=title, abstract, heading word, drug trade name, original title, device manufacturer, drug manufacturer, device trade name, keyword, floating subheading] |
| 6  | exp health care facility/                                                                                                                                                                                                                                                                                                                                                                                                                                                                                                                                                                                                                                                                                                                    |
| 7  | exp health care delivery/                                                                                                                                                                                                                                                                                                                                                                                                                                                                                                                                                                                                                                                                                                                    |
| 8  | 5 OR 6 OR 7                                                                                                                                                                                                                                                                                                                                                                                                                                                                                                                                                                                                                                                                                                                                  |
| 9  | (Burnout or staff outcome* or job satisfaction or staff satisfaction or employee satisfaction or employee outcome* or retention or staff recognition or employee recognition or intention to stay or intention to leave or debrief* or intent to turnover or turnover intention or organi*ation* commitment or stress or work attitude or occupational hazard* or collegiality or working relationship* or teamwork or collaboration).mp. [mp=title, abstract, heading word, drug trade name, original title, device manufacturer, drug manufacturer, device trade name, keyword, floating subheading]                                                                                                                                       |
| 10 | Exp health personnel attitude/                                                                                                                                                                                                                                                                                                                                                                                                                                                                                                                                                                                                                                                                                                               |
| 11 | job satisfaction/                                                                                                                                                                                                                                                                                                                                                                                                                                                                                                                                                                                                                                                                                                                            |
| 12 | stress/                                                                                                                                                                                                                                                                                                                                                                                                                                                                                                                                                                                                                                                                                                                                      |
| 13 | burnout/                                                                                                                                                                                                                                                                                                                                                                                                                                                                                                                                                                                                                                                                                                                                     |
| 14 | 9 OR 10 OR 11 OR 12 OR 13                                                                                                                                                                                                                                                                                                                                                                                                                                                                                                                                                                                                                                                                                                                    |
| 15 | 4 AND 8 AND 14                                                                                                                                                                                                                                                                                                                                                                                                                                                                                                                                                                                                                                                                                                                               |

**Table 3. Ovid MEDLINE search strategy**

|    |                                                                                                                                                                                                                                                                                                                                                                                                                                                                                                                                                                                                                                                                                                                                             |
|----|---------------------------------------------------------------------------------------------------------------------------------------------------------------------------------------------------------------------------------------------------------------------------------------------------------------------------------------------------------------------------------------------------------------------------------------------------------------------------------------------------------------------------------------------------------------------------------------------------------------------------------------------------------------------------------------------------------------------------------------------|
| 1  | (person-organi*ation fit or person organi*ation fit or supplementary fit or complementary fit or needs-supplies fit or supplies-values fit or demands-abilities fit or supplementary congruence or complementary congruence or similarity fit or value congruence or goal congruence or personality congruence or person-group fit or person-team fit).mp. [mp=title, abstract, heading word, drug trade name, original title, device manufacturer, drug manufacturer, device trade name, keyword, floating subheading]                                                                                                                                                                                                                     |
| 2  | (person adj3 group).ti,ab.                                                                                                                                                                                                                                                                                                                                                                                                                                                                                                                                                                                                                                                                                                                  |
| 3  | (person adj3 organi*ation).ti,ab.                                                                                                                                                                                                                                                                                                                                                                                                                                                                                                                                                                                                                                                                                                           |
| 4  | 1 OR 2 OR 3                                                                                                                                                                                                                                                                                                                                                                                                                                                                                                                                                                                                                                                                                                                                 |
| 5  | (Health organi*ation* or hospital* or health facilit* or acute care or primary care or primary health care or health context or health setting or health service or health*care or tertiary care or nurse* or health profession* or doctor or GP or physician* or dentist* or health or health care service* or gyn*ecologist* or h*ematologist* or internist* or obstetrician* or p*ediatician* or pharmacist* or physiotherapist* or psychiatrist* or psychologist* or radiologist* or surgeon* or surgery or therapist* or counse*lor* or neurologist* or optometrist*).mp. [mp=title, abstract, heading word, drug trade name, original title, device manufacturer, drug manufacturer, device trade name, keyword, floating subheading] |
| 6  | “Delivery of Health Care”/                                                                                                                                                                                                                                                                                                                                                                                                                                                                                                                                                                                                                                                                                                                  |
| 7  | 5 OR 6                                                                                                                                                                                                                                                                                                                                                                                                                                                                                                                                                                                                                                                                                                                                      |
| 8  | (Burnout or staff outcome* or job satisfaction or staff satisfaction or employee satisfaction or employee outcome* or retention or staff recognition or employee recognition or intention to stay or intention to leave or debrief* or intent to turnover or turnover intention or organi*ation* commitment or stress or work attitude or occupational hazard* or collegiality or working relationship* or teamwork or collaboration).mp. [mp=title, abstract, heading word, drug trade name, original title, device manufacturer, drug manufacturer, device trade name, keyword, floating subheading]                                                                                                                                      |
| 9  | job satisfaction/                                                                                                                                                                                                                                                                                                                                                                                                                                                                                                                                                                                                                                                                                                                           |
| 10 | Stress, psychological/                                                                                                                                                                                                                                                                                                                                                                                                                                                                                                                                                                                                                                                                                                                      |
| 11 | Burnout, professional/                                                                                                                                                                                                                                                                                                                                                                                                                                                                                                                                                                                                                                                                                                                      |
| 12 | Personnel turnover/                                                                                                                                                                                                                                                                                                                                                                                                                                                                                                                                                                                                                                                                                                                         |
| 13 | Interprofessional relations/                                                                                                                                                                                                                                                                                                                                                                                                                                                                                                                                                                                                                                                                                                                |
| 14 | 8 OR 9 OR 10 OR 11 OR 12 OR 13                                                                                                                                                                                                                                                                                                                                                                                                                                                                                                                                                                                                                                                                                                              |
| 15 | 4 AND 7 AND 14                                                                                                                                                                                                                                                                                                                                                                                                                                                                                                                                                                                                                                                                                                                              |



1  
2  
3  
4  
5  
6  
7  
8  
9  
10  
11  
12  
13  
14  
15  
16  
17  
18  
19  
20  
21  
22  
23  
24  
25  
26  
27  
28  
29  
30  
31  
32  
33  
34  
35  
36  
37  
38  
39  
40  
41  
42  
43  
44  
45  
46

**Table 4. PsycINFO search strategy**

|    |                                                                                                                                                                                                                                                                                                                                                                                                                                                                                                                                                                                                                                                                                                                                              |
|----|----------------------------------------------------------------------------------------------------------------------------------------------------------------------------------------------------------------------------------------------------------------------------------------------------------------------------------------------------------------------------------------------------------------------------------------------------------------------------------------------------------------------------------------------------------------------------------------------------------------------------------------------------------------------------------------------------------------------------------------------|
| 1  | (person-organi*ation fit or person organi*ation fit or supplementary fit or complementary fit or needs-supplies fit or supplies-values fit or demands-abilities fit or supplementary congruence or complementary congruence or similarity fit or value congruence or goal congruence or personality congruence or person-group fit or person-team fit).mp. [mp=title, abstract, heading word, drug trade name, original title, device manufacturer, drug manufacturer, device trade name, keyword, floating subheading]                                                                                                                                                                                                                      |
| 2  | (person adj3 group).ti,ab.                                                                                                                                                                                                                                                                                                                                                                                                                                                                                                                                                                                                                                                                                                                   |
| 3  | (person adj3 organi*ation).ti,ab.                                                                                                                                                                                                                                                                                                                                                                                                                                                                                                                                                                                                                                                                                                            |
| 4  | 1 OR 2 OR 3                                                                                                                                                                                                                                                                                                                                                                                                                                                                                                                                                                                                                                                                                                                                  |
| 5  | (Health organi*ation* or hospital* or health facilit* or acute care or primary care or primary health care or health context or health setting or health service or health*care or tertiary care or nurse* or health profession* or doctor or GP or physician* or dentist* or health or health care service* or gyn*ecologist* or h*ematologist* or internist* or obstetrician* or p*ediatrician* or pharmacist* or physiotherapist* or psychiatrist* or psychologist* or radiologist* or surgeon* or surgery or therapist* or counse*lor* or neurologist* or optometrist*).mp. [mp=title, abstract, heading word, drug trade name, original title, device manufacturer, drug manufacturer, device trade name, keyword, floating subheading] |
| 6  | Exp health care delivery/                                                                                                                                                                                                                                                                                                                                                                                                                                                                                                                                                                                                                                                                                                                    |
| 7  | 5 OR 6                                                                                                                                                                                                                                                                                                                                                                                                                                                                                                                                                                                                                                                                                                                                       |
| 8  | (Burnout or staff outcome* or job satisfaction or staff satisfaction or employee satisfaction or employee outcome* or retention or staff recognition or employee recognition or intention to stay or intention to leave or debrief* or intent to turnover or turnover intention or organi*ation* commitment or stress or work attitude or occupational hazard* or collegiality or working relationship* or teamwork or collaboration).mp. [mp=title, abstract, heading word, drug trade name, original title, device manufacturer, drug manufacturer, device trade name, keyword, floating subheading]                                                                                                                                       |
| 9  | Exp health personnel attitudes/                                                                                                                                                                                                                                                                                                                                                                                                                                                                                                                                                                                                                                                                                                              |
| 10 | Exp job satisfaction/                                                                                                                                                                                                                                                                                                                                                                                                                                                                                                                                                                                                                                                                                                                        |
| 11 | Exp occupational stress/                                                                                                                                                                                                                                                                                                                                                                                                                                                                                                                                                                                                                                                                                                                     |
| 12 | Exp employee turnover/                                                                                                                                                                                                                                                                                                                                                                                                                                                                                                                                                                                                                                                                                                                       |
| 13 | 8 OR 9 OR 10 OR 11 OR 12                                                                                                                                                                                                                                                                                                                                                                                                                                                                                                                                                                                                                                                                                                                     |

---

14 4 AND 7 AND 13

---

### Table 5. SCOPUS search strategy

---

TITLE-ABS-KEY(("person-organi\*ation fit" OR "person organi\*ation fit" OR "supplementary fit" OR "complementary fit" OR "needs-supplies fit" OR "supplies-values fit" OR "demands-abilities fit" OR "supplementary congruence" OR "complementary congruence" OR "similarity fit" OR "value congruence" OR "goal congruence" OR "personality congruence" OR "person-group fit" OR "person-team fit") AND ("Health organi\*ation\*" OR "hospital\*" OR "health facilit\*" OR "acute care" OR "primary care" OR "primary health care" OR "health context" OR "health setting" OR "health service" OR "health\*care" OR "tertiary care" OR "nurse\*" OR "health profession\*" OR "doctor" OR "GP" OR "physician\*" OR "dentist\*" OR "health" OR "health care service\*" OR "gyn\*ecologist\*" OR "h\*ematologist\*" OR "internist\*" OR "obstetrician\*" OR "p\*ediatrician\*" OR "pharmacist\*" OR "physiotherapist\*" OR "psychiatrist\*" OR "psychologist\*" OR "radiologist\*" OR "surgeon\*" OR "surgery" OR "therapist\*" OR "counse\*lor\*" OR "neurologist\*" OR "optometrist\*") AND ("Burnout" OR "staff outcome\*" OR "job satisfaction" OR "staff satisfaction" OR "employee satisfaction" OR "employee outcome\*" OR "retention" OR "staff recognition" OR "employee recognition" OR "intention to stay" OR "intention to leave" OR "debrief\*" OR "intent to turnover" OR "turnover intention" OR "organi\*ation\* commitment" OR "stress" OR "work attitude" OR "occupational hazard\*" OR "collegiality" OR "working relationship\*" OR "teamwork" OR "collaboration"))

---

1  
2  
3  
4  
5  
6  
7  
8  
9  
10  
11  
12  
13  
14  
15  
16  
17  
18  
19  
20  
21  
22  
23  
24  
25  
26  
27  
28  
29  
30  
31  
32  
33  
34  
35  
36  
37  
38  
39  
40  
41  
42  
43  
44  
45  
46

**APPENDIX 2: Quality Assessment Tool Ratings of Articles Included in Systematic Review**

| Reference                                                                                              | Abstract and title | Introduction and aims | Method and data | Sampling | Data analysis | Ethics and bias | Results | Transferability/generalizability | Usefulness | Total |
|--------------------------------------------------------------------------------------------------------|--------------------|-----------------------|-----------------|----------|---------------|-----------------|---------|----------------------------------|------------|-------|
| Bao Y, Vedina R, Moodie S, and Dolan S. (2013) <i>Journal of Advanced Nursing</i> . 69(3):631-641.     | 4                  | 4                     | 4               | 4        | 4             | 4               | 4       | 4                                | 4          | 36    |
| Bellou V. (2009) <i>Employee Relations</i> . 31(5):455-470.                                            | 4                  | 4                     | 4               | 4        | 4             | 2               | 4       | 4                                | 4          | 34    |
| Boon C, and Biron M. (2016) <i>Human Relations</i> . 69(12):2177-2200.                                 | 4                  | 3                     | 4               | 4        | 4             | 2               | 3       | 4                                | 4          | 32    |
| Cha J, Chang YK, and Kim T-Y. (2014) <i>Journal of Business Ethics</i> . 123(1):57-69.                 | 4                  | 4                     | 4               | 4        | 4             | 2               | 4       | 4                                | 4          | 34    |
| Cooper-Thomas HD, and Poutasi C.(2011) <i>Asia Pacific Journal of Human Resources</i> . 49(2):180-192. | 4                  | 4                     | 4               | 4        | 4             | 4               | 4       | 3                                | 4          | 35    |
| Dotson MJ, Dave                                                                                        | 3                  | 2                     | 2               | 3        | 3             | 1               | 3       | 3                                | 3          | 23    |

| Reference                                                                                                 | Abstract and title | Introduction and aims | Method and data | Sampling | Data analysis | Ethics and bias | Results | Transferability/generalizability | Usefulness | Total |
|-----------------------------------------------------------------------------------------------------------|--------------------|-----------------------|-----------------|----------|---------------|-----------------|---------|----------------------------------|------------|-------|
| DS, Cazier JA, and Spaulding TJ. (2014) <i>Journal of Nursing Administration</i> . 44(2):111-116.         |                    |                       |                 |          |               |                 |         |                                  |            |       |
| Findik M, Ögüt A, and Çağlıyan V. (2013) <i>Mediterranean Journal of Social Sciences</i> . 4(11):434-440. | 4                  | 2                     | 2               | 3        | 3             | 1               | 3       | 3                                | 2          | 23    |
| Gates MG, and Mark BA. (2012) <i>Research in Nursing and Health</i> . 35(3):265-276.                      | 3                  | 4                     | 4               | 4        | 4             | 2               | 4       | 3                                | 4          | 32    |
| Gillet N, Fouquereau E, Coillot H, et al. (2018) <i>Journal of Advanced Nursing</i> . 74(5):1208-1219.    | 4                  | 4                     | 4               | 3        | 4             | 3               | 4       | 3                                | 4          | 33    |

1  
2  
3  
4  
5  
6  
7  
8  
9  
10  
11  
12  
13  
14  
15  
16  
17  
18  
19  
20  
21  
22  
23  
24  
25  
26  
27  
28  
29  
30  
31  
32  
33  
34  
35  
36  
37  
38  
39  
40  
41  
42  
43  
44  
45  
46

| Reference                                                                                                                           | Abstract and title | Introduction and aims | Method and data | Sampling | Data analysis | Ethics and bias | Results | Transferability/generalizability | Usefulness | Total |
|-------------------------------------------------------------------------------------------------------------------------------------|--------------------|-----------------------|-----------------|----------|---------------|-----------------|---------|----------------------------------|------------|-------|
| Gregory ST and Menser T. (2015) <i>Journal of healthcare management / American College of Healthcare Executives.</i> 60(2):133-148. | 3                  | 3                     | 2               | 2        | 4             | 1               | 4       | 2                                | 2          | 23    |
| Hatton C, Rivers M, Mason H, et al. (1999) <i>Journal of Intellectual Disability Research.</i> 43(3):206-218.                       | 4                  | 4                     | 3               | 3        | 4             | 1               | 3       | 3                                | 4          | 29    |
| Kalliath TJ, Bluedorn AC, and Strube MJ. (1999) <i>Journal of Organizational Behavior.</i> 20(7):1175-1198.                         | 4                  | 4                     | 3               | 4        | 4             | 4               | 3       | 4                                | 4          | 34    |
| Lamiani G, Dordoni P, and Argentero P. (2018) <i>Stress and Health.</i> 34(1):135-142.                                              | 3                  | 4                     | 4               | 3        | 4             | 4               | 4       | 3                                | 4          | 33    |

| Reference                                                                                                       | Abstract and title | Introduction and aims | Method and data | Sampling | Data analysis | Ethics and bias | Results | Transferability/generalizability | Usefulness | Total |
|-----------------------------------------------------------------------------------------------------------------|--------------------|-----------------------|-----------------|----------|---------------|-----------------|---------|----------------------------------|------------|-------|
| Lee S and Jang E. (2017) <i>Journal of Engineering and Applied Sciences</i> . 12(14):3767-3778.                 | 3                  | 4                     | 4               | 3        | 4             | 1               | 4       | 3                                | 4          | 30    |
| Leiter MP, Day A, and Price L. (2015) <i>Burnout Research</i> . 2(1):25-35.                                     | 4                  | 2                     | 3               | 3        | 3             | 4               | 3       | 4                                | 4          | 30    |
| Leiter MP, Frank E, and Matheson TJ. (2009) <i>Canadian Family Physician</i> . 55(12):1224-1226.                | 3                  | 4                     | 4               | 4        | 3             | 2               | 3       | 4                                | 4          | 31    |
| Leiter MP, Gascon S, and Maru'nez-Jarreta B. (2010) <i>Journal of Applied Social Psychology</i> . 40(1): 57-75. | 3                  | 4                     | 4               | 4        | 4             | 3               | 4       | 4                                | 4          | 34    |

1  
2  
3  
4  
5  
6  
7  
8  
9  
10  
11  
12  
13  
14  
15  
16  
17  
18  
19  
20  
21  
22  
23  
24  
25  
26  
27  
28  
29  
30  
31  
32  
33  
34  
35  
36  
37  
38  
39  
40  
41  
42  
43  
44  
45  
46

| Reference                                                                                              | Abstract and title | Introduction and aims | Method and data | Sampling | Data analysis | Ethics and bias | Results | Transferability/generalizability | Usefulness | Total |
|--------------------------------------------------------------------------------------------------------|--------------------|-----------------------|-----------------|----------|---------------|-----------------|---------|----------------------------------|------------|-------|
| Leiter MP, Jackson NJ, and Shaughnessy K. (2009) <i>Journal of Nursing Management</i> . 17(1):100-109. | 4                  | 4                     | 4               | 3        | 4             | 2               | 4       | 2                                | 4          | 31    |
| Leiter MP. (2008) <i>Giornale Italiano di Medicina del Lavoro Ed Ergonomia</i> . 30(1 Suppl A):A52-58. | 4                  | 3                     | 3               | 4        | 3             | 2               | 1       | 3                                | 3          | 26    |
| Reh fuss MC, Gambrell CE, and Meyer D. (2012) <i>The Career Development Quarterly</i> . 60(2):145-151. | 4                  | 4                     | 4               | 3        | 4             | 4               | 4       | 3                                | 4          | 34    |
| Ren T, and Hamann DJ. (2015) <i>Personnel Review</i> . 44(4):550-566.                                  | 3                  | 4                     | 4               | 3        | 4             | 3               | 4       | 4                                | 4          | 33    |
| Ren T. (2013) <i>Journal of Business Ethics</i> . 112(2):213-224.                                      | 4                  | 4                     | 4               | 3        | 4             | 2               | 3       | 3                                | 4          | 31    |
| Risman KL, Erickson RJ, and                                                                            | 4                  | 4                     | 4               | 3        | 4             | 1               | 3       | 3                                | 4          | 30    |

| Reference                                                                                       | Abstract and title | Introduction and aims | Method and data | Sampling | Data analysis | Ethics and bias | Results | Transferability/generalizability | Usefulness | Total |
|-------------------------------------------------------------------------------------------------|--------------------|-----------------------|-----------------|----------|---------------|-----------------|---------|----------------------------------|------------|-------|
| Diefendorff JM. (2016) <i>Applied Nursing Research</i> . 31:121-125.                            |                    |                       |                 |          |               |                 |         |                                  |            |       |
| Schmidt KH. (2010) <i>International Journal of Nursing Studies</i> . 47(7):855-863.             | 4                  | 4                     | 4               | 3        | 3             | 2               | 4       | 4                                | 4          | 32    |
| Shao J, Tang L, Wang X et al. (2018) <i>Journal of Nursing Management</i> . 26(8):1091-1099.    | 4                  | 4                     | 4               | 3        | 4             | 1               | 4       | 3                                | 4          | 31    |
| Somers MJ. (2010) <i>Journal of Occupational and Organizational Psychology</i> . 83(2):443-453. | 3                  | 4                     | 4               | 3        | 4             | 1               | 4       | 3                                | 4          | 30    |
| Verplanken B. (2004) <i>International Journal of Nursing Studies</i> . 41(6):599-605.           | 4                  | 4                     | 4               | 4        | 4             | 1               | 4       | 3                                | 3          | 31    |
| Zhang M, Yan F, Wang W, and Li G. (2017) <i>BMJ</i>                                             | 4                  | 4                     | 4               | 3        | 4             | 4               | 4       | 4                                | 4          | 35    |



1  
2  
3  
4  
5  
6  
7  
8  
9  
10  
11  
12  
13  
14  
15  
16  
17  
18  
19  
20  
21  
22  
23  
24  
25  
26  
27  
28  
29  
30  
31  
32  
33  
34  
35  
36  
37  
38  
39  
40  
41  
42  
43  
44  
45  
46

---

| Reference | Abstract and title | Introduction and aims | Method and data | Sampling | Data analysis | Ethics and bias | Results | Transferability/generalizability | Usefulness | Total |
|-----------|--------------------|-----------------------|-----------------|----------|---------------|-----------------|---------|----------------------------------|------------|-------|
|-----------|--------------------|-----------------------|-----------------|----------|---------------|-----------------|---------|----------------------------------|------------|-------|

---

*Open. 7(2).*

---

For peer review only

### APPENDIX 3. Information About Included Articles from the Systematic Review

| Reference                                                                                          | Study objectives/hypotheses/<br>research questions related to<br>systematic review                                                                                                                                                                                                                                                  | Study design                  | Context; type of<br>participants;<br>number of<br>participants         | PO/PG fit?*; type of<br>fit studied; findings<br>direction; staff<br>outcome                                       | Key findings                                                                                                                                                                                                                                                                                                                                                                                                                                                                                              |
|----------------------------------------------------------------------------------------------------|-------------------------------------------------------------------------------------------------------------------------------------------------------------------------------------------------------------------------------------------------------------------------------------------------------------------------------------|-------------------------------|------------------------------------------------------------------------|--------------------------------------------------------------------------------------------------------------------|-----------------------------------------------------------------------------------------------------------------------------------------------------------------------------------------------------------------------------------------------------------------------------------------------------------------------------------------------------------------------------------------------------------------------------------------------------------------------------------------------------------|
| Bao Y, Vedina R, Moodie S, and Dolan S. (2013) <i>Journal of Advanced Nursing</i> . 69(3):631-641. | Value incongruence will be positively related to burnout, turnover intention and accident propensity, and negatively related to self-rated health. Moreover, it was hypothesised that burnout mediates the relationship between value incongruence and self-rated health/turnover intention/accident propensity. (see p. 633-634)   | Quantitative; cross-sectional | Large university hospital; nurses; 234                                 | PO; value congruence; self-rated health, turnover intention, accident propensity, burnout; partly positive         | “Of the three value axes, Economical and Ethical value incongruence are correlated with burnout. This suggests that hypothesis H1 is supported on these two axes. Moreover, Emotional and Ethical value incongruence were correlated with accident propensity. Thus, hypothesis H4a was supported on these two axes. All three types of value incongruence were correlated with turnover intention (hypothesis H3a fully confirmed), but none of them was related to health (H2a rejected).” (p. 635-636) |
| Bellou V. (2009) <i>Employee Relations</i> . 31(5):455-470.                                        | “This study is an attempt to explore the effect that value congruence between employees and public organizations has on exit, voice, loyalty, and neglect (EVLN) displayed by the former ... This study expects to reveal the mediating role of job satisfaction in the relationship between P-O fit and these responses.” (p. 456) | Quantitative; cross-sectional | Three public hospitals; medical, nursing and administration staff; 125 | PO; supplementary value congruence; exit, voice, loyalty and neglect (EVLN), and job satisfaction; partly positive | “The greater the P-O fit, the higher the job satisfaction and the loyalty. On the contrary, the relationship between P-O fit and neglect is negative whereas between P-O fit and exit and voice is non-significant.” (p. 463, statistics excluded from quote)                                                                                                                                                                                                                                             |
| Boon C, and Biron M. (2016) <i>Human Relations</i> . 69(12):2177-                                  | “We examine the role of leader-member exchange in the relationship between two types of person-environment fit over                                                                                                                                                                                                                 | Quantitative; longitudinal    | Elderly care organisation; nurses, therapists, physicians and          | PO; supplementary value congruence; turnover; nil                                                                  | PO fit was significantly correlated with needs-supplies and demands-abilities fit, but were not significantly correlated with actual turnover (p. 2188)                                                                                                                                                                                                                                                                                                                                                   |

|                                                                                                        |                                                                                                                                                                                                                                                                                                                                                                                                                                               |                               |                                                                                                                                                                                                                 |                                                                                                                                                                                              |                                                                                                                                                                                                                                                                                          |
|--------------------------------------------------------------------------------------------------------|-----------------------------------------------------------------------------------------------------------------------------------------------------------------------------------------------------------------------------------------------------------------------------------------------------------------------------------------------------------------------------------------------------------------------------------------------|-------------------------------|-----------------------------------------------------------------------------------------------------------------------------------------------------------------------------------------------------------------|----------------------------------------------------------------------------------------------------------------------------------------------------------------------------------------------|------------------------------------------------------------------------------------------------------------------------------------------------------------------------------------------------------------------------------------------------------------------------------------------|
| 2200.                                                                                                  | time: person–organization and person–job fit, and subsequent turnover” (p. 2177)                                                                                                                                                                                                                                                                                                                                                              |                               | support staff; 160                                                                                                                                                                                              |                                                                                                                                                                                              |                                                                                                                                                                                                                                                                                          |
| Cha J, Chang YK, and Kim T-Y. (2014) <i>Journal of Business Ethics</i> . 123(1):57-69.                 | “Hypothesis 3a Organizational citizenship and caring behavior will decrease as personal prosocial identity increases toward organizational prosocial identity and will increase as personal prosocial identity exceeds organizational prosocial identity.<br>Hypothesis 3b Organizational citizenship and caring behavior will be higher when personal and organizational prosocial identities are both high than when both are low.” (p. 61) | Quantitative; cross-sectional | 104 hospitals; doctors, nurses, administrative staff; 589                                                                                                                                                       | PO; supplementary personality and value congruence; organizational citizenship behaviour (OCB), caring behaviour; positive                                                                   | “Hypothesis 3a was supported only for OCBI and caring behavior ... Hypothesis 3b was supported” (p. 64-65) OBCI=OBC towards individuals (rather than organisations)                                                                                                                      |
| Cooper-Thomas HD, and Poutasi C.(2011) <i>Asia Pacific Journal of Human Resources</i> . 49(2):180-192. | “Research question 1: Is PJ fit or PO fit the more important predictor of (a) job satisfaction and (b) organizational commitment?<br>Research question 2: Which mediated path is the strongest predictor of intent to quit?” (p. 183)                                                                                                                                                                                                         | Quantitative; cross-sectional | Different contexts; Pacific health care workers with various roles, eg, nursing, administration, management (heritage from a Pacific Island, have higher rates of chronic illness than other ethnic groups); 99 | PO; complementary and supplementary (but it is unspecified which component of supplementary fit is being examined); job satisfaction, organisational commitment, intention to quit; positive | PO fit was significantly positively correlated with job satisfaction and organisational commitment, and significantly negatively correlated with intention to quit. Job satisfaction and organizational commitment themselves also have significant direct effects on intention to quit. |
| Dotson MJ, Dave DS, Cazier JA, and Spaulding TJ. (2014) <i>Journal of</i>                              | Measured the effect of value congruence on intention to leave the job and the nursing profession, and job satisfaction                                                                                                                                                                                                                                                                                                                        | Quantitative; cross-sectional | Various nursing contexts, eg, hospital, administration,                                                                                                                                                         | PO, PG; supplementary value congruence; intention to leave job, intention                                                                                                                    | As expected, value congruence was significantly positively associated with job satisfaction, and negatively associated with intention to leave the job. However                                                                                                                          |

|                                                                                                           |                                                                                                                                                                                                                                                                                                |                               |                                                                                                              |                                                                                                                                                                                  |                                                                                                                                                                                                                                                                                                       |
|-----------------------------------------------------------------------------------------------------------|------------------------------------------------------------------------------------------------------------------------------------------------------------------------------------------------------------------------------------------------------------------------------------------------|-------------------------------|--------------------------------------------------------------------------------------------------------------|----------------------------------------------------------------------------------------------------------------------------------------------------------------------------------|-------------------------------------------------------------------------------------------------------------------------------------------------------------------------------------------------------------------------------------------------------------------------------------------------------|
| Nursing Administration. 44(2):111-116.                                                                    |                                                                                                                                                                                                                                                                                                |                               | doctors office, school. In rural and urban environments; nurses; 861                                         | to leave profession, job satisfaction; partly positive                                                                                                                           | unexpectedly it was also significantly <i>positively</i> associated with intention to leave the nursing profession                                                                                                                                                                                    |
| Findik M, Öğüt A, and Çağlıyan V. (2013) <i>Mediterranean Journal of Social Sciences</i> . 4(11):434-440. | “To study the relationships between the level of person-organization fit, the level of job satisfaction, and the levels of turnover intentions.” (p. 436)                                                                                                                                      | Quantitative; cross-sectional | Doctors and professors working in internal medicine, surgical or basic medicine areas; health personnel; 128 | PO, PG; PO: supplementary value congruence, knowledge, skills and abilities (KSAs), personality. PG: supplementary value congruence; job satisfaction, turnover intent; positive | The study reported a statistically significant relationship between PO fit and both job satisfaction and turnover intent                                                                                                                                                                              |
| Gates MG, and Mark BA. (2012) <i>Research in Nursing and Health</i> . 35(3):265-276.                      | “The greater the diversity based on values, the more negative the outcomes.” (p. 267)                                                                                                                                                                                                          | Quantitative; longitudinal    | Participants included in the final study worked in 239 units from 133 hospitals; nurses; 1,450               | PG; supplementary value congruence; job satisfaction, intent to stay; positive                                                                                                   | “The less similar nurses perceived themselves to be relative to others in their unit in terms of values (eg, greater perceived value diversity), the less likely they were to be satisfied with their jobs and the less likely they were to report intent to stay in their current position” (p. 272) |
| Gillet N, Fouquereau E, Coillot H, et al. (2018) <i>Journal of Advanced Nursing</i> . 74(5):1208-1219.    | That value congruence would be positively related to nurse job satisfaction, and that this may be mediated by needs satisfaction. It was also hypothesised that nurses’ job satisfaction would be positively associated with quality of care and negatively associated with intention to quit. | Quantitative; cross-sectional | Nurses from 11 oncology units; 144                                                                           | PO; supplementary value congruence; positive                                                                                                                                     | The statistical analyses found that value congruence positively predicts nurses’ job satisfaction, and that job satisfaction was positively associated with quality of care and negatively with turnover intentions.                                                                                  |
| Gregory ST and Menser T. (2015) <i>Journal of healthcare</i>                                              | “This study is an opportunity to develop and test the theory for burnout in the primary care setting; specifically, it will                                                                                                                                                                    | Quantitative; longitudinal    | Ambulatory units: primary care physicians; 153 (97 at baseline, 91 at                                        | PO; supplementary value congruence; burnout; positive                                                                                                                            | It was reported that values were significantly association with all three aspects of burnout (emotional exhaustion, depersonalization, and self-efficacy, which is defined as the level of                                                                                                            |

|                                                                                                                      |                                                                                                                                                                                                                                                                                                                                                                                                |                                      |                                                                                                                                                                                                                        |                                                                                                                               |                                                                                                                                                                                                                                                                                                                                                                                                                                                                                                                                                                                                                                                                                                                                   |
|----------------------------------------------------------------------------------------------------------------------|------------------------------------------------------------------------------------------------------------------------------------------------------------------------------------------------------------------------------------------------------------------------------------------------------------------------------------------------------------------------------------------------|--------------------------------------|------------------------------------------------------------------------------------------------------------------------------------------------------------------------------------------------------------------------|-------------------------------------------------------------------------------------------------------------------------------|-----------------------------------------------------------------------------------------------------------------------------------------------------------------------------------------------------------------------------------------------------------------------------------------------------------------------------------------------------------------------------------------------------------------------------------------------------------------------------------------------------------------------------------------------------------------------------------------------------------------------------------------------------------------------------------------------------------------------------------|
| <p>management / American College of Healthcare Executives. 60(2):133-148.</p>                                        | <p>determine the applicability of the AWS model in measuring burnout for primary care physicians.” (p. 137)</p>                                                                                                                                                                                                                                                                                |                                      | <p>the 3-month follow-up, and 56 at the final 6-month follow-up) representing 244 total responses</p>                                                                                                                  |                                                                                                                               | <p>personal accomplishment one feels with respect to their work).<sup>2,13,14</sup></p>                                                                                                                                                                                                                                                                                                                                                                                                                                                                                                                                                                                                                                           |
| <p>Hatton C, Rivers M, Mason H, et al. (1999) <i>Journal of Intellectual Disability Research</i>. 43(3):206-218.</p> | <p>“To investigate relationships between person± organization ‘fit’ and staff outcomes. If the theory is correct, greater person±organization ‘fit’ should be associated with better staff outcomes across a range of indices.” (p. 43)</p>                                                                                                                                                    | <p>Quantitative; cross-sectional</p> | <p>UK services for people with intellectual disabilities (village, community residential, education and community teams); staff at all levels, eg, administrative, domestic, managerial and therapeutic staff; 450</p> | <p>PO; NA; job stress, job search behaviour, intention to leave, sick leave behaviour, work satisfaction; partly positive</p> | <p>“Higher levels of general stress were strongly associated with poorer person-organization fit on the organization culture dimension of tolerant/ staff-oriented. Greater job strain was strongly associated with poorer person-organization fit on four dimensions ... Intention to leave was strongly associated with poorer person-organization fit on four organizational culture dimensions ... Actual job search behaviour and sick leave in the previous 6 months were not strongly associated with any dimension of organizational culture. Finally, higher levels of work satisfaction were very strongly associated with better person-organization fit on all nine dimensions of organizational culture” (p. 43)</p> |
| <p>Kalliath TJ, Bluedorn AC, and Strube MJ. (1999) <i>Journal of Organizational Behavior</i>. 20(7):1175-1198.</p>   | <p>“The greater the congruence between individuals' (a) internal process (b) open systems (c) human relations, and (d) rational goal values and their perceptions of (a) internal process (b) open systems (c) human relations, and (d) rational goal values in the organization, respectively, the higher their levels of organizational commitment ... [and] job satisfaction” (p. 1181)</p> | <p>Quantitative; cross-sectional</p> | <p>Two hospitals; executives, middle managers, first-line supervisors, employees, resident physicians, contract workers; 1358</p>                                                                                      | <p>PO; value congruence; job satisfaction, organisational commitment; positive</p>                                            | <p>There were significant positive intercorrelations between value congruence on the one hand, and job satisfaction and organisational commitment on the other. Moreover, “These results indicate weak support for the four congruence hypotheses predicting organizational commitment ... [and] predicting job satisfaction” (p. 1189)</p>                                                                                                                                                                                                                                                                                                                                                                                       |

|                                                                                                          |                                                                                                                 |                                                                                                                                                                                                                                          |                               |                                                                                 |                                                       |                                                                                                                                                                                                                                                                                                                                                                                                                                                     |
|----------------------------------------------------------------------------------------------------------|-----------------------------------------------------------------------------------------------------------------|------------------------------------------------------------------------------------------------------------------------------------------------------------------------------------------------------------------------------------------|-------------------------------|---------------------------------------------------------------------------------|-------------------------------------------------------|-----------------------------------------------------------------------------------------------------------------------------------------------------------------------------------------------------------------------------------------------------------------------------------------------------------------------------------------------------------------------------------------------------------------------------------------------------|
| 1<br>2<br>3<br>4<br>5<br>6<br>7<br>8<br>9<br>10                                                          | Lamiani G, Dordoni P, and Argentero P. (2018) <i>Stress and Health</i> . 34(1):135-142.                         | To investigate if moral distress mediated the relationship between clinicians' value congruence and depression                                                                                                                           | Quantitative; cross-sectional | Seven intensive care units in a hospital; physicians, nurses and residents; 181 | PO; supplementary value congruence; positive          | Value congruence had a significant effect on depression, mediated by moral distress                                                                                                                                                                                                                                                                                                                                                                 |
| 11<br>12<br>13<br>14<br>15<br>16                                                                         | Lee S and Jang E. (2017) <i>Journal of Engineering and Applied Sciences</i> . 12(14):3767-3778.                 | That PO fit perceptions will have a unique positive relationship with organizational commitment and job satisfaction                                                                                                                     | Quantitative; cross-sectional | Hospital, pharmacy, and other non-health settings; 199                          | PO; supplementary value congruence; positive          | PO has unique, statistically significant positive relationships with organisational commitment and job satisfaction                                                                                                                                                                                                                                                                                                                                 |
| 17<br>18<br>19<br>20<br>21<br>22                                                                         | Leiter MP, Day A, and Price L. (2015) <i>Burnout Research</i> . 2(1):25-35.                                     | “To examine the contribution of attachment dimensions to predicting burnout beyond measures of workload, value congruence, and coworker incivility” (p. 31-32)                                                                           | Quantitative; cross-sectional | Hospital; managers and front-line staff from many professions; 1624             | PO; supplementary value congruence; burnout; positive | “The contribution of attachment styles to a model of burnout based on workload and value congruence emphasizes the importance of considering employees’ understanding of their social context” (p.34) ... value congruence was significantly associated with all other variables                                                                                                                                                                    |
| 23<br>24<br>25<br>26<br>27<br>28                                                                         | Leiter MP, Frank E, and Matheson TJ. (2009) <i>Canadian Family Physician</i> . 55(12):1224-1226.                | “Values and manageable workload would interact differently for women and men when predicting burnout.” (p. 1225.e1)                                                                                                                      | Quantitative; cross-sectional | NA (online survey); physicians; 2536                                            | PO; supplementary value congruence; burnout; positive | “Values congruence predicted exhaustion and cynicism for men and women (P = .001)” (p. 1225e2) ... “The results also confirmed that workload and values congruence interact differently for women and men.” (p. 1225e4)                                                                                                                                                                                                                             |
| 29<br>30<br>31<br>32<br>33<br>34<br>35<br>36<br>37<br>38<br>39<br>40<br>41<br>42<br>43<br>44<br>45<br>46 | Leiter MP, Gascon S, and Maru'nez-Jarreta B. (2010) <i>Journal of Applied Social Psychology</i> . 40(1): 57-75. | “The study evaluates a structural equation model in which the three aspects of burnout— exhaustion, cynicism, and efficacy—mediate the relationship of the work environment with employees’ evaluation of organizational change” (p. 57) | Quantitative; cross-sectional | Three hospitals in northern and Eastern Spain; nurses and physicians; 874; 603  | PO; value congruence; burnout; positive               | There was a significant negative correlation for both doctors and nurses value congruence with exhaustion and cynicism (components of burnout), and a significantly positive correlation with efficacy. (p. 66) ... “Second, value congruence was significantly related to all three aspects of relationships with work. The path from values to cynicism was relatively small in the modified model, indicating that most of that relationship was |

|                                                                                                        |                                                                                                                                                                                                                                                                                                                               |                               |                                                                                             |                                                                        |                                                                                                                                                                                                                                                                                                          |
|--------------------------------------------------------------------------------------------------------|-------------------------------------------------------------------------------------------------------------------------------------------------------------------------------------------------------------------------------------------------------------------------------------------------------------------------------|-------------------------------|---------------------------------------------------------------------------------------------|------------------------------------------------------------------------|----------------------------------------------------------------------------------------------------------------------------------------------------------------------------------------------------------------------------------------------------------------------------------------------------------|
|                                                                                                        |                                                                                                                                                                                                                                                                                                                               |                               |                                                                                             |                                                                        | mediated through exhaustion in light of the large zero-order correlation between the two constructs. They are clearly related, but much of that relationship is associated with the energetic process captured by exhaustion. Together, the analysis supports the core constructs of the model.” (p. 70) |
| Leiter MP, Jackson NJ, and Shaughnessy K. (2009) <i>Journal of Nursing Management</i> . 17(1):100-109. | Authors expected there would be “a more powerful relationship of work values with generation than with organizational tenure. This contrast is central to the study’s focus on generation as a value position: the important point is not simply a nurses’ age or job tenure, but the inherent generational values.” (p. 103) | Quantitative; cross-sectional | Acute care facilities; nurses; 667                                                          | PO; supplementary value congruence; burnout, turnover intent; positive | “The analysis identified a greater person/organization value mismatch for Generation X nurses than for Baby Boomer nurses. Their greater value mismatch was associated with a greater susceptibility to burnout and a stronger intention to quit for Generation X nurses.” (p. 100)                      |
| Leiter MP. (2008) <i>Giornale Italiano di Medicina del Lavoro Ed Ergonomia</i> . 30(1 Suppl A):A52-58. | To test “the extent to which value congruence enhances the prediction of burnout beyond the prediction provided by demands and resources.” (p. A52)                                                                                                                                                                           | Quantitative; cross-sectional | Tertiary hospitals, regional hospitals, community hospitals and other settings; nurses; 725 | PO; value congruence; burnout; positive                                | There was a significant correlation between value congruence and each dimension of burnout ... For further analysis, “Only two correlated error terms were freed in the analysis: MBI-3 with MBI-4 and Control-1 with Control-2.” (p. A56) So values were not analysed in results.                       |
| Rehfluss MC, Gambrell CE, and Meyer D. (2012) <i>The Career Development Quarterly</i> . 60(2):145-151. | “We hypothesized that each type of fit would be positively related to counselor career satisfaction.” (p. 146)                                                                                                                                                                                                                | Quantitative; cross-sectional | Various counselling and counselling education contexts; counsellors; 437                    | PO; supplementary value congruence; career satisfaction; positive      | “P-O and N-S fit were both positively related to career satisfaction, and no relationship was found between career satisfaction and D-A fit.” (p. 149) Please note, N-S and D-A fit were measured for person-job fit, and are not considered further for this systematic review                          |

|                                                                      |                                                                                                  |                                                                                                                                                                                                                                                                                                                       |                               |                                                                                                                                |                                                                                                                             |                                                                                                                                                                                                                                                                                                                                                                                                                                                                                                                          |
|----------------------------------------------------------------------|--------------------------------------------------------------------------------------------------|-----------------------------------------------------------------------------------------------------------------------------------------------------------------------------------------------------------------------------------------------------------------------------------------------------------------------|-------------------------------|--------------------------------------------------------------------------------------------------------------------------------|-----------------------------------------------------------------------------------------------------------------------------|--------------------------------------------------------------------------------------------------------------------------------------------------------------------------------------------------------------------------------------------------------------------------------------------------------------------------------------------------------------------------------------------------------------------------------------------------------------------------------------------------------------------------|
| 1<br>2<br>3<br>4<br>5<br>6<br>7<br>8<br>9<br>10                      | Ren T, and Hamann DJ. (2015) <i>Personnel Review</i> . 44(4):550-566.                            | Examine how employee-organisation value congruence was related to the staff outcomes of satisfaction, turnover intent and organisational commitment at different levels of nursing.                                                                                                                                   | Quantitative; cross-sectional | Nursing homes; nurses; 562                                                                                                     | PO; supplementary value congruence; satisfaction, turnover intent and organisational commitment; positive                   | “Value congruence is found positively associated with nurses’ job satisfaction and organizational commitment, but negatively with turnover intention.” (p. 550)                                                                                                                                                                                                                                                                                                                                                          |
| 11<br>12<br>13<br>14<br>15<br>16<br>17<br>18<br>19<br>20<br>21<br>22 | Ren T. (2013) <i>Journal of Business Ethics</i> . 112(2):213-224.                                | “Organizational ownership moderates the relationship between employee–organization value congruence and employees’ (a) job satisfaction, (b) organizational commitment, and (c) intent to quit in a way that the effect is stronger among for-profit employees in comparison to the nonprofit counterparts.” (p. 215) | Quantitative; cross-sectional | 23 non-profit and 7 for-profit nursing homes; registered nurses, licenced practicing nurses, certified nursing assistants; 407 | PO; value congruence; Job satisfaction, Organisational commitment, intention to quit; positive                              | “Employees’ value congruence has a positive relationship with employees’ self-rating on job satisfaction (p < 0.01, two-tailed test), organizational commitment (p < 0.01, two-tailed test), and a negative relationship with intent to quit (p < 0.01, two-tailed test) ... in general, value congruence improves the three aspects of job attitudes across different ownership types of organization, and among two out of the three cases the effect appears to be stronger in for-profit organizations” (p. 221-222) |
| 23<br>24<br>25<br>26<br>27<br>28<br>29<br>30                         | Risman KL, Erickson RJ, and Diefendorff JM. (2016) <i>Applied Nursing Research</i> . 31:121-125. | “This study investigates the relationship of perceived value congruence with ... job satisfaction ... [it is hypothesised that] value congruence will be positively related to nurses’ job satisfaction.” (p. 122)                                                                                                    | Quantitative; cross-sectional | Hospital; nurses; 753                                                                                                          | PO; supplementary value congruence (although one item unintentionally measures goal congruence); job satisfaction; positive | Perceived value congruence was significantly correlated with job satisfaction                                                                                                                                                                                                                                                                                                                                                                                                                                            |



|                                                                                                                                  |                                                                                                       |                                                                                                                                                                                                                                                                                                                                                         |                                  |                                                                             |                                                                                                                        |                                                                                                                                                                                                                                                                                                                                                                                                                                                                                                                                                                                         |
|----------------------------------------------------------------------------------------------------------------------------------|-------------------------------------------------------------------------------------------------------|---------------------------------------------------------------------------------------------------------------------------------------------------------------------------------------------------------------------------------------------------------------------------------------------------------------------------------------------------------|----------------------------------|-----------------------------------------------------------------------------|------------------------------------------------------------------------------------------------------------------------|-----------------------------------------------------------------------------------------------------------------------------------------------------------------------------------------------------------------------------------------------------------------------------------------------------------------------------------------------------------------------------------------------------------------------------------------------------------------------------------------------------------------------------------------------------------------------------------------|
| 1<br>2<br>3<br>4<br>5<br>6<br>7<br>8<br>9<br>10<br>11<br>12<br>13<br>14                                                          | Schmidt KH.<br>(2010) <i>International Journal of Nursing Studies</i> .<br>47(7):855-863.             | “Goal incongruence is expected to be positively related to indicators of job strain.” (p. 857)                                                                                                                                                                                                                                                          | Quantitative;<br>longitudinal    | Six nursing homes; employees in the nursing homes; 242                      | PO; goal congruence; burnout, psychosomatic complaints, absenteeism; positive                                          | Goal incongruence was significantly correlated with all outcome variables ... “the results show that the perceived mismatch between personal and organizational goals is positively related to a broad spectrum of indicators of strain that includes both self-report measures (exhaustion, depersonalization, psychosomatic complaints) and measures of absenteeism covering a period of 12 months after the administration of questionnaires.” (p. 860)                                                                                                                              |
| 15<br>16<br>17<br>18<br>19<br>20<br>21<br>22<br>23<br>24                                                                         | Shao J, Tang L, Wang X et al.<br>(2018) <i>Journal of Nursing Management</i> .<br>26(8):1091-1099.    | To explore the relationship between work environment, value congruence and work-related outcomes                                                                                                                                                                                                                                                        | Quantitative;<br>cross-sectional | Nationwide; nurses; 19149                                                   | PO; supplementary value congruence; positive                                                                           | The results showed that value congruence was positively associated with job satisfaction, and negatively associated with burnout and turnover intention                                                                                                                                                                                                                                                                                                                                                                                                                                 |
| 25<br>26<br>27<br>28<br>29<br>30<br>31<br>32<br>33<br>34<br>35<br>36<br>37<br>38<br>39<br>40<br>41<br>42<br>43<br>44<br>45<br>46 | Somers MJ.<br>(2010) <i>Journal of Occupational and Organizational Psychology</i> .<br>83(2):443-453. | “The level of person–organization value congruence for highly committed employees, those with an AC–NC dominant profile, and those with an AC dominant profile is significantly greater than is the level of person–organization value congruence for the other commitment profiles.” (p. 447).<br>AC= affective commitment;<br>NC=normative commitment | Quantitative;<br>longitudinal    | Hospital in an urban area; employees directly involved in patient care; 572 | PO; supplementary value congruence; organisational commitment, turnover intent, turnover, absenteeism; partly positive | Value congruence was significantly correlated with affective and normative commitment, turnover intention and turnover, but not absenteeism. The P-O fit hypothesis was supported such that “the AC–NC dominant profile had the highest levels of person-organization value- congruence followed by highly committed employees and those with an AC dominant profile. Although, the ordering of the means was as expected, it should be noted that the difference between highly committed employees and those with an AC dominant profile was not statistically significant.” (p. 450) |

|                                                             |                                                                                       |                                                                                                                                         |                               |                                                          |                                                                                    |                                                                                                                                                                                                                                                                                                                                                                                                                 |
|-------------------------------------------------------------|---------------------------------------------------------------------------------------|-----------------------------------------------------------------------------------------------------------------------------------------|-------------------------------|----------------------------------------------------------|------------------------------------------------------------------------------------|-----------------------------------------------------------------------------------------------------------------------------------------------------------------------------------------------------------------------------------------------------------------------------------------------------------------------------------------------------------------------------------------------------------------|
| 1<br>2<br>3<br>4<br>5<br>6<br>7<br>8<br>9<br>10<br>11<br>12 | Verplanken B. (2004) <i>International Journal of Nursing Studies</i> . 41(6):599-605. | “The present study addressed the question how value congruence relates to job satisfaction” (p. 600)                                    | Quantitative; cross-sectional | Hospital surgery ward; nurses; 56                        | PG; value congruence; job satisfaction, employee attitude, time pressure; positive | “It was expected that job satisfaction would be predicted by ward attitudes. The correlation between these two variables was indeed the largest, but human relations and rational goal value congruence were also significantly correlated with job satisfaction.” (p. 602) ... human relations value congruence was significantly correlated with ward attitude (p<.001) and job satisfaction (p<.05) (p. 603) |
| 13<br>14<br>15<br>16<br>17<br>18                            | Zhang M, Yan F, Wang W, and Li G. (2017) <i>BMJ Open</i> . 7(2).                      | “This study aims to examine the mediation effect of job satisfaction on the relationship between P-O fit and turnover intention” (p. 1) | Quantitative; cross-sectional | Community health facility; community health workers; 656 | PO; needs-supplies; turnover intent, job satisfaction; positive                    | PO fit was significantly positively associated with job satisfaction, and inversely correlated with turnover intent.                                                                                                                                                                                                                                                                                            |

19 \*Included studies may have also measured other types of P-E fit eg, P-J or P-V fit, but this was not reported in this table as it is unrelated to the aims of the systematic review.

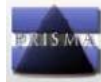

# PRISMA 2009 Checklist

| Section/topic                      | #  | Checklist item                                                                                                                                                                                                                                                                                              | Reported on page # |
|------------------------------------|----|-------------------------------------------------------------------------------------------------------------------------------------------------------------------------------------------------------------------------------------------------------------------------------------------------------------|--------------------|
| <b>TITLE</b>                       |    |                                                                                                                                                                                                                                                                                                             |                    |
| Title                              | 1  | Identify the report as a systematic review, meta-analysis, or both.                                                                                                                                                                                                                                         | 1                  |
| <b>ABSTRACT</b>                    |    |                                                                                                                                                                                                                                                                                                             |                    |
| Structured summary                 | 2  | Provide a structured summary including, as applicable: background; objectives; data sources; study eligibility criteria, participants, and interventions; study appraisal and synthesis methods; results; limitations; conclusions and implications of key findings; systematic review registration number. | 2-3                |
| <b>INTRODUCTION</b>                |    |                                                                                                                                                                                                                                                                                                             |                    |
| Rationale                          | 3  | Describe the rationale for the review in the context of what is already known.                                                                                                                                                                                                                              | 5-7                |
| Objectives                         | 4  | Provide an explicit statement of questions being addressed with reference to participants, interventions, comparisons, outcomes, and study design (PICOS).                                                                                                                                                  | 5-7                |
| <b>METHODS</b>                     |    |                                                                                                                                                                                                                                                                                                             |                    |
| Protocol and registration          | 5  | Indicate if a review protocol exists, if and where it can be accessed (e.g., Web address), and, if available, provide registration information including registration number.                                                                                                                               | n.a.               |
| Eligibility criteria               | 6  | Specify study characteristics (e.g., PICOS, length of follow-up) and report characteristics (e.g., years considered, language, publication status) used as criteria for eligibility, giving rationale.                                                                                                      | 7-8                |
| Information sources                | 7  | Describe all information sources (e.g., databases with dates of coverage, contact with study authors to identify additional studies) in the search and date last searched.                                                                                                                                  | 8                  |
| Search                             | 8  | Present full electronic search strategy for at least one database, including any limits used, such that it could be repeated.                                                                                                                                                                               | 8, and appendix    |
| Study selection                    | 9  | State the process for selecting studies (i.e., screening, eligibility, included in systematic review, and, if applicable, included in the meta-analysis).                                                                                                                                                   | 8-9                |
| Data collection process            | 10 | Describe method of data extraction from reports (e.g., piloted forms, independently, in duplicate) and any processes for obtaining and confirming data from investigators.                                                                                                                                  | 8-9                |
| Data items                         | 11 | List and define all variables for which data were sought (e.g., PICOS, funding sources) and any assumptions and simplifications made.                                                                                                                                                                       | 9                  |
| Risk of bias in individual studies | 12 | Describe methods used for assessing risk of bias of individual studies (including specification of whether this was done at the study or outcome level), and how this information is to be used in any data synthesis.                                                                                      | 9                  |
| Summary measures                   | 13 | State the principal summary measures (e.g., risk ratio, difference in means).                                                                                                                                                                                                                               | n.a.               |
| Synthesis of results               | 14 | Describe the methods of handling data and combining results of studies, if done, including measures of consistency (e.g., I <sup>2</sup> ) for each meta-analysis.                                                                                                                                          | n.a.               |

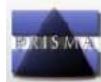

# PRISMA 2009 Checklist

Page 1 of 2

| Section/topic                 | #  | Checklist item                                                                                                                                                                                           | Reported on page #  |
|-------------------------------|----|----------------------------------------------------------------------------------------------------------------------------------------------------------------------------------------------------------|---------------------|
| Risk of bias across studies   | 15 | Specify any assessment of risk of bias that may affect the cumulative evidence (e.g., publication bias, selective reporting within studies).                                                             | 9-10                |
| Additional analyses           | 16 | Describe methods of additional analyses (e.g., sensitivity or subgroup analyses, meta-regression), if done, indicating which were pre-specified.                                                         | n.a.                |
| <b>RESULTS</b>                |    |                                                                                                                                                                                                          |                     |
| Study selection               | 17 | Give numbers of studies screened, assessed for eligibility, and included in the review, with reasons for exclusions at each stage, ideally with a flow diagram.                                          | 10                  |
| Study characteristics         | 18 | For each study, present characteristics for which data were extracted (e.g., study size, PICOS, follow-up period) and provide the citations.                                                             | 10-11               |
| Risk of bias within studies   | 19 | Present data on risk of bias of each study and, if available, any outcome level assessment (see item 12).                                                                                                | 10, and appendix    |
| Results of individual studies | 20 | For all outcomes considered (benefits or harms), present, for each study: (a) simple summary data for each intervention group (b) effect estimates and confidence intervals, ideally with a forest plot. | 10-14, and appendix |
| Synthesis of results          | 21 | Present results of each meta-analysis done, including confidence intervals and measures of consistency.                                                                                                  | n.a.                |
| Risk of bias across studies   | 22 | Present results of any assessment of risk of bias across studies (see Item 15).                                                                                                                          | 10, and appendix    |
| Additional analysis           | 23 | Give results of additional analyses, if done (e.g., sensitivity or subgroup analyses, meta-regression [see Item 16]).                                                                                    | n.a.                |
| <b>DISCUSSION</b>             |    |                                                                                                                                                                                                          |                     |
| Summary of evidence           | 24 | Summarize the main findings including the strength of evidence for each main outcome; consider their relevance to key groups (e.g., healthcare providers, users, and policy makers).                     | 15-16               |
| Limitations                   | 25 | Discuss limitations at study and outcome level (e.g., risk of bias), and at review-level (e.g., incomplete retrieval of identified research, reporting bias).                                            | 17                  |
| Conclusions                   | 26 | Provide a general interpretation of the results in the context of other evidence, and implications for future research.                                                                                  | 17                  |
| <b>FUNDING</b>                |    |                                                                                                                                                                                                          |                     |
| Funding                       | 27 | Describe sources of funding for the systematic review and other support (e.g., supply of data); role of funders for the systematic review.                                                               | 3                   |

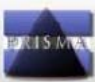

# PRISMA 2009 Checklist

1  
2  
3  
4  
5  
6  
7  
8  
9  
10  
11  
12  
13  
14  
15  
16  
17  
18  
19  
20  
21  
22  
23  
24  
25  
26  
27  
28  
29  
30  
31  
32  
33  
34  
35  
36  
37  
38  
39  
40  
41  
42  
43  
44  
45  
46  
47

doi:10.1371/journal.pmed1000097

For more information, visit: [www.prisma-statement.org](http://www.prisma-statement.org).

Page 2 of 2

For peer review only
